# Supplementary material for: Detecting differential protein abundance by combining peptide level P -values
Source: Royal Society of Chemistry journal article supplement (doi:10.1039/d0mo00045k), 2020-09-11
Supplement: d0mo00045k1.xlsx [file d0mo00045k1.xlsx]

## Sheet: CPTAC_B-A
Protein	MSqRob_shared	MSstats_shared	LFQ_shared	PECA_shared	eBayes_EBM_shared	Label
O00762ups|UBE2C_HUMAN_UPS	9.14623e-09	0.000380869	1.65179e-05	8.67506e-06	5.95717e-06	1
P00441ups|SODC_HUMAN_UPS	0.268834	0.0144524	0.000123991	4.14303e-09	8.60717e-08	1
P00709ups|LALBA_HUMAN_UPS	5.49489e-07	0.00133114	0.24674	0.000110919	0.000221658	1
P00918ups|CAH2_HUMAN_UPS	1.83132e-05	0.000401409	8.30102e-06	6.55365e-05	2.62082e-05	1
P01031ups|CO5_HUMAN_UPS	2.42349e-12	0.000937473	0.0157441	0.000125139	6.3357e-05	1
P01127ups|PDGFB_HUMAN_UPS	2.71144e-15	0.00133128	3.5902e-05	1.25095e-06	2.97687e-06	1
P01344ups|IGF2_HUMAN_UPS	0.0146396	0.018275	8.97775e-05	0.00834477	0.00550152	1
P02144ups|MYG_HUMAN_UPS	3.59565e-06	0.00371022	0.000107766	0.00013484	8.82127e-06	1
P02753ups|RETBP_HUMAN_UPS	0.0546818	0.0129526	0.0137096	0.00043038	0.000254422	1
P04040ups|CATA_HUMAN_UPS	3.2783e-07	0.000901304	2.39088e-05	2.35899e-05	0.000205815	1
P06732ups|KCRM_HUMAN_UPS	9.48212e-06	0.00252722	0.000185844	3.24787e-08	5.82577e-08	1
P08263ups|GSTA1_HUMAN_UPS	0.000236841	0.0172014	0.00564765	3.99827e-06	2.01855e-05	1
P10145ups|IL8_HUMAN_UPS	1.48207e-10	0.000755499	0.000239052	0.000311527	0.000119838	1
P10599ups|THIO_HUMAN_UPS	3.19181e-05	0.00168898	0.00126107	0.000166857	0.000104238	1
P10636-8ups|TAU_HUMAN_UPS	7.61569e-40	0.00021685	1.34026e-06	8.39193e-14	2.43876e-07	1
P12081ups|SYHC_HUMAN_UPS	0.240898	0.000151088	0.185188	2.53865e-06	8.00129e-06	1
P51965ups|UB2E1_HUMAN_UPS	4.02588e-10	0.0536132	7.96124e-05	0.000827967	0.000419103	1
P61769ups|B2MG_HUMAN_UPS	0.00291264	0.000342972	3.4496e-05	0.00620258	0.00249566	1
P62937ups|PPIA_HUMAN_UPS	0.452796	0.0243794	0.0227853	0.0197236	0.000875108	1
P63165ups|SUMO1_HUMAN_UPS	0.0095591	0.036154	0.0566876	0.016573	0.00635469	1
Q06830ups|PRDX1_HUMAN_UPS	3.43127e-11	0.000582561	0.00149292	6.48534e-09	4.19978e-06	1
sp|O13563|RPN13_YEAST	0.724646	0.674974	0.294963	0.936721	0.490326	0
sp|O14467|MBF1_YEAST	0.458445	0.13393	0.130943	0.999953	0.435869	0
sp|P00498|HIS1_YEAST	0.593974	0.000511337	0.0301902	0.996633	0.194389	0
sp|P00817|IPYR_YEAST	0.999982	0.0363827	0.549517	0.90319	0.755323	0
sp|P01120|RAS2_YEAST	0.999986	0.871999	0.736486	0.977051	0.678935	0
sp|P02309|H4_YEAST	0.964781	0.0374413	0.618729	0.922639	0.551978	0
sp|P02406|RL28_YEAST	1	0.550555	0.250358	0.983061	0.668429	0
sp|P02557|TBB_YEAST	0.787352	0.295401	0.331141	0.536713	0.400146	0
sp|P02829|HSP82_YEAST	1	0.638151	0.264523	0.832363	0.398491	0
sp|P04650|RL39_YEAST	1	0.185095	0.0685695	0.757164	0.368425	0
sp|P04802|SYDC_YEAST	0.999991	0.289388	0.174338	0.999999	0.571443	0
sp|P04806|HXKA_YEAST	0.309544	0.653855	0.132671	0.283262	0.0957625	0
sp|P05739|RL6B_YEAST	0.925507	0.999315	0.761415	0.97351	0.545673	0
sp|P06101|CDC37_YEAST	0.333845	0.693024	0.361293	0.965547	0.338208	0
sp|P06103|EIF3B_YEAST	0.261721	0.28769	0.153563	0.998778	0.614472	0
sp|P06208|LEU1_YEAST	0.858356	0.580983	0.54235	0.753522	0.163739	0
sp|P06780|RHO1_YEAST	0.956922	0.934958	0.270222	0.930668	0.402575	0
sp|P07170|KAD2_YEAST	0.99998	0.943833	0.264216	1	0.831229	0
sp|P07213|TOM70_YEAST	1	0.455623	0.550419	0.999683	0.268962	0
sp|P07246|ADH3_YEAST	0.307055	0.269583	0.169591	0.973746	0.326638	0
sp|P07267|CARP_YEAST	0.930009	0.994277	0.467333	0.999164	0.602448	0
sp|P07273|TFS2_YEAST	0.0156904	0.0635939	0.225761	0.147281	0.0649664	0
sp|P07274|PROF_YEAST	1	0.133258	0.0812928	0.296491	0.134918	0
sp|P07347|ARD1_YEAST	0.865873	0.488374	0.216828	0.778483	0.355139	0
sp|P07991|OAT_YEAST	0.465293	0.866607	0.709002	0.93993	0.010512	0
sp|P09064|IF2B_YEAST	0.90384	0.171668	0.56675	0.998868	0.169407	0
sp|P09232|PRTB_YEAST	1	0.925389	0.37974	0.990436	0.464046	0
sp|P10080|SSBP1_YEAST	0.615995	0.740867	0.153297	0.920478	0.592986	0
sp|P10614|CP51_YEAST	0.887661	0.639701	0.237486	0.982123	0.294014	0
sp|P10869|AK_YEAST	0.730851	0.340791	0.0392285	0.970367	0.16407	0
sp|P10964|RPA1_YEAST	0.144692	0.0299536	0.105167	0.999854	0.3997	0
sp|P11484|SSB1_YEAST	1	0.607553	0.171784	0.794375	0.381457	0
sp|P11745|RNA1_YEAST	0.999945	0.825124	0.774891	0.81273	0.458224	0
sp|P12385|ERF1_YEAST	0.716348	0.972959	0.467242	0.999823	0.0183928	0
sp|P12945|NAT1_YEAST	0.844806	0.542945	0.533569	0.760105	0.542969	0
sp|P13188|SYQ_YEAST	0.363226	0.299475	0.699869	1	0.724848	0
sp|P13663|DHAS_YEAST	0.406985	0.0974862	0.429998	0.999999	0.358924	0
sp|P15108|HSC82_YEAST	0.556736	0.286472	0.302666	0.992432	0.58851	0
sp|P15454|KGUA_YEAST	0.870518	0.417792	0.457753	0.999701	0.48157	0
sp|P15565|TRM1_YEAST	0.701013	0.618298	0.311658	0.870481	0.274913	0
sp|P15703|BGL2_YEAST	0.633653	0.333683	0.294169	0.999838	0.56312	0
sp|P15891|ABP1_YEAST	0.674051	0.731673	0.590024	0.999435	0.806595	0
sp|P16120|THRC_YEAST	0.338783	0.650273	0.272422	0.927893	0.378275	0
sp|P16140|VATB_YEAST	1	0.445909	0.153265	1	0.724042	0
sp|P16451|ODPX_YEAST	1	0.699367	0.00458456	0.91505	0.383114	0
sp|P16474|BIP_YEAST	0.42587	0.710925	0.219308	0.999998	0.493303	0
sp|P16603|NCPR_YEAST	0.388495	0.10445	0.0827041	0.64702	0.240262	0
sp|P16861|PFKA1_YEAST	0.897615	0.905484	0.44809	1	0.671821	0
sp|P17255|VATA_YEAST	0.944327	0.423269	0.44359	1	0.792199	0
sp|P17695|GLRX2_YEAST	1	0.0389376	0.0652065	0.608388	0.296071	0
sp|P17709|HXKG_YEAST	0.892189	0.406002	0.0874751	0.467167	0.330195	0
sp|P18759|SEC18_YEAST	0.395153	0.264985	0.551654	0.981618	0.551007	0
sp|P20051|PYRC_YEAST	0.948208	0.704156	0.419608	0.967147	0.380172	0
sp|P20447|DBP3_YEAST	0.854564	0.749616	0.123745	0.653826	0.228885	0
sp|P20449|DBP5_YEAST	0.692806	0.925368	0.16589	0.984419	0.36717	0
sp|P20606|SAR1_YEAST	1	0.567223	0.539699	0.995447	0.603488	0
sp|P21243|PSA1_YEAST	0.858748	0.625532	0.212007	0.873646	0.530741	0
sp|P21264|PUR6_YEAST	0.66402	0.452076	0.333604	0.332871	0.157929	0
sp|P21576|VPS1_YEAST	0.285114	0.777106	0.121003	0.999734	0.336361	0
sp|P21734|UBC1_YEAST	0.522358	0.308184	0.603374	0.894813	0.441939	0
sp|P21827|RCC1_YEAST	0.999998	0.254433	0.0796008	0.305784	0.153634	0
sp|P21954|IDHP_YEAST	0.879764	0.851355	0.691106	0.965241	0.570534	0
sp|P22138|RPA2_YEAST	1	0.450647	0.445739	0.985962	0.472238	0
sp|P22768|ASSY_YEAST	0.421354	0.0447718	0.0643344	0.839854	0.283206	0
sp|P22943|HSP12_YEAST	0.97368	0.665147	0.843079	0.791877	0.430276	0
sp|P23638|PSA3_YEAST	0.988642	0.288436	0.120358	0.272321	0.230608	0
sp|P23639|PSA2_YEAST	0.641102	0.0785937	0.0904722	0.852505	0.354495	0
sp|P24276|SSD1_YEAST	1	0.472007	0.198748	0.92768	0.503619	0
sp|P25045|LCB1_YEAST	1	0.11226	0.0562229	0.28476	0.0657742	0
sp|P25340|ERG4_YEAST	0.706617	0.641216	0.398722	0.692968	0.415791	0
sp|P25343|RV161_YEAST	0.673415	0.434771	0.461777	0.595654	0.238289	0
sp|P25349|YCP4_YEAST	0.953061	0.486464	0.139952	0.501909	0.234682	0
sp|P25382|NLE1_YEAST	0.66546	0.40429	0.0415756	0.37376	0.163574	0
sp|P25443|RS2_YEAST	1	0.923721	0.418582	0.999932	0.580796	0
sp|P25586|KRR1_YEAST	0.388774	0.180407	0.344448	0.967077	0.54042	0
sp|P25719|CYPC_YEAST	1	0.76559	0.480286	0.994721	0.508293	0
sp|P26637|SYLC_YEAST	0.683283	0.911892	0.226356	0.999999	0.789838	0
sp|P26784|RL16A_YEAST	0.784483	0.96286	0.266512	0.999988	0.615211	0
sp|P27476|NSR1_YEAST	0.526017	0.0998642	0.677485	0.999963	0.806061	0
sp|P27614|CBPS_YEAST	0.445131	0.631637	0.341551	0.350943	0.273262	0
sp|P27810|KTR1_YEAST	0.810445	0.988624	0.140006	0.933546	0.449221	0
sp|P28272|PYRD_YEAST	1	0.981252	0.397082	0.973234	0.20478	0
sp|P28319|CWP1_YEAST	0.680261	0.21227	0.154164	0.892931	0.501844	0
sp|P29547|EF1G1_YEAST	1	0.91387	0.627016	0.999987	0.303413	0
sp|P31373|CYS3_YEAST	0.999012	0.141607	0.30642	0.746197	0.252166	0
sp|P31412|VATC_YEAST	1	0.0621146	0.429858	0.954442	0.545626	0
sp|P32263|P5CR_YEAST	0.92769	0.752685	0.609133	0.996664	0.58892	0
sp|P32377|MVD1_YEAST	1	0.820669	0.288607	0.971747	0.596572	0
sp|P32379|PSA5_YEAST	0.353225	0.382658	0.293761	0.806558	0.27197	0
sp|P32386|YBT1_YEAST	0.341683	0.0937798	0.394029	0.66143	0.122709	0
sp|P32445|RIM1_YEAST	0.675955	0.535395	0.192476	0.69803	0.445405	0
sp|P32476|ERG1_YEAST	1	0.0511335	0.0949042	0.0305314	0.02568	0
sp|P32521|PAN1_YEAST	0.635898	0.314403	0.191274	0.716909	0.0105851	0
sp|P32558|SPT16_YEAST	1	0.0401122	0.246102	0.919651	0.119159	0
sp|P32614|FRDS_YEAST	0.348409	0.067543	0.0972527	0.677555	0.135607	0
sp|P32790|SLA1_YEAST	1	0.181989	0.999997	0.998549	0.42541	0
sp|P32911|SUI1_YEAST	0.912211	0.550951	0.310115	0.932728	0.465172	0
sp|P33297|PRS6A_YEAST	0.0462388	0.109716	0.0461579	0.234685	0.0790401	0
sp|P33299|PRS7_YEAST	0.999979	0.38309	0.125199	0.659668	0.332799	0
sp|P33401|PGM1_YEAST	0.681945	0.920352	0.481018	0.956482	0.504567	0
sp|P33442|RS3A1_YEAST	0.661789	0.929082	0.576653	0.775329	0.420667	0
sp|P33775|PMT1_YEAST	0.975484	0.339863	0.196124	0.81047	0.421783	0
sp|P34078|LTV1_YEAST	0.447488	0.220645	0.167214	0.403476	0.158789	0
sp|P34167|IF4B_YEAST	1	0.16383	0.32305	0.999136	0.145769	0
sp|P35719|MRP8_YEAST	0.874136	0.760845	0.138975	0.990764	0.418199	0
sp|P36008|EF1G2_YEAST	0.99984	0.589119	0.161494	0.999996	0.44507	0
sp|P36010|NDK_YEAST	0.302098	0.351534	0.0523799	0.987396	0.548928	0
sp|P36018|YPT52_YEAST	0.358565	0.100399	0.254721	0.324955	0.132333	0
sp|P36049|EBP2_YEAST	1	0.314725	0.780479	0.567285	0.605446	0
sp|P36105|RL14A_YEAST	0.94853	0.0424888	0.367634	0.377308	0.192003	0
sp|P36114|YKR18_YEAST	0.617047	0.132913	0.123808	0.321562	0.169751	0
sp|P36160|RPF2_YEAST	0.999266	0.0334514	0.423249	0.713641	0.234935	0
sp|P37838|NOP4_YEAST	0.851344	0.241035	0.0300908	0.533831	0.143939	0
sp|P38011|GBLP_YEAST	1	0.581138	0.413642	0.999803	0.748538	0
sp|P38013|AHP1_YEAST	0.500415	0.998474	0.256338	0.737502	0.460074	0
sp|P38061|RL32_YEAST	0.976617	0.277136	0.370659	1	0.425208	0
sp|P38116|ARL1_YEAST	0.269281	0.0492996	0.0394401	0.425476	0.208588	0
sp|P38203|LSM2_YEAST	1	0.167556	0.000877088	9.10749e-05	8.77063e-05	0
sp|P38248|ECM33_YEAST	0.999971	0.40337	0.537604	0.912674	0.62827	0
sp|P38249|EIF3A_YEAST	0.845019	0.949854	0.442687	0.999952	0.685371	0
sp|P38250|IST2_YEAST	0.771149	0.819372	0.486799	0.812869	0.323433	0
sp|P38328|ARPC1_YEAST	0.359575	0.216576	0.742018	0.43335	0.207029	0
sp|P38333|ENP1_YEAST	0.31833	0.081903	0.08838	0.400258	0.151887	0
sp|P38353|SSH1_YEAST	1	0.134408	0.702563	0.269767	0.283155	0
sp|P38624|PSB1_YEAST	1	0.580515	0.343205	0.565634	0.252207	0
sp|P38625|GUAA_YEAST	0.630421	0.175991	0.234349	1	0.382492	0
sp|P38626|NCB5R_YEAST	0.576161	0.555983	0.217486	0.305683	0.17572	0
sp|P38682|GLO3_YEAST	0.43793	0.153867	0.023172	0.541545	0.112533	0
sp|P38688|SRP72_YEAST	1	0.467407	0.301955	0.999155	0.490081	0
sp|P38701|RS20_YEAST	0.747324	0.685208	0.417281	0.994831	0.660803	0
sp|P38715|GRE3_YEAST	0.446097	0.357257	0.727652	0.593951	0.650972	0
sp|P38764|RPN1_YEAST	1	0.736163	0.241617	0.966802	0.395379	0
sp|P38777|FSH1_YEAST	0.682402	0.385971	0.142754	0.707047	0.356693	0
sp|P38817|GGA2_YEAST	0.943117	0.268074	0.236342	0.497405	0.342562	0
sp|P38879|NACA_YEAST	0.999998	0.629979	0.377877	0.999995	0.572661	0
sp|P38910|CH10_YEAST	1	0.767167	0.759897	0.967876	0.56674	0
sp|P38934|BFR1_YEAST	0.523605	0.896108	0.711399	0.999978	0.257295	0
sp|P39076|TCPB_YEAST	1	0.777927	0.437441	0.995359	0.575861	0
sp|P39077|TCPG_YEAST	0.972063	0.66259	0.140311	0.997261	0.339696	0
sp|P39730|IF2P_YEAST	0.465116	0.629782	0.210082	1	0.651892	0
sp|P39935|IF4F1_YEAST	0.695701	0.387765	0.317519	0.999938	0.559678	0
sp|P39958|GDI1_YEAST	0.999956	0.242772	0.0964809	0.693767	0.182602	0
sp|P39986|ATC6_YEAST	0.99956	0.17451	0.233605	0.98398	0.527507	0
sp|P39990|SNU13_YEAST	0.999993	0.333318	0.253835	0.975272	0.474609	0
sp|P40016|RPN3_YEAST	0.483193	0.75516	0.777473	0.821507	0.120637	0
sp|P40054|SERA_YEAST	0.84075	0.600093	0.277889	0.371954	0.186432	0
sp|P40093|YEY6_YEAST	0.40242	0.476048	0.0045333	0.769131	0.453234	0
sp|P40185|MMF1_YEAST	0.497909	0.0667003	0.354659	0.928042	0.429107	0
sp|P40215|NDH1_YEAST	0.742174	0.96657	0.439534	0.994982	0.362497	0
sp|P40413|TCPE_YEAST	0.706942	0.547262	0.0914741	0.590588	0.185903	0
sp|P40517|YRB2_YEAST	0.999993	0.383586	0.128626	0.604046	0.2931	0
sp|P40518|ARPC5_YEAST	0.693283	0.151135	0.124156	0.498204	0.255208	0
sp|P40581|GPX3_YEAST	0.999913	0.525746	0.0793471	0.454151	0.213996	0
sp|P40825|SYA_YEAST	0.830105	0.436972	0.2832	1	0.814591	0
sp|P40970|LCB2_YEAST	1	0.135416	0.0664706	0.242457	0.0777337	0
sp|P40991|NOP2_YEAST	0.978233	0.212301	0.570955	0.991556	0.260091	0
sp|P41807|VATH_YEAST	0.675323	0.539005	0.188022	0.886245	0.496262	0
sp|P41810|COPB_YEAST	0.662455	0.88186	0.22941	0.97136	0.549991	0
sp|P42838|LEM3_YEAST	0.56432	0.265565	0.102443	0.690223	0.234024	0
sp|P43561|FET5_YEAST	0.32925	0.677201	0.742994	0.972988	0.494838	0
sp|P46655|SYEC_YEAST	0.982627	0.807489	0.418125	1	0.598095	0
sp|P46989|ATG27_YEAST	0.803978	0.872673	0.0487804	0.655347	0.286889	0
sp|P47120|DOHH_YEAST	1	0.265373	0.336496	1	0.641307	0
sp|P47154|STE24_YEAST	0.954047	0.415986	0.496369	0.954558	0.421134	0
sp|P47912|LCF4_YEAST	0.971909	0.581592	0.606056	0.995327	0.643987	0
sp|P48570|HOSC_YEAST	0.280488	0.736672	0.308084	0.471576	0.223778	0
sp|P48837|NUP57_YEAST	0.999967	0.951572	0.376251	0.978522	0.42031	0
sp|P49367|LYS4_YEAST	0.741655	0.216275	0.0149869	0.167496	0.0554591	0
sp|P49435|APT1_YEAST	0.31948	0.529809	0.573528	0.891977	0.61821	0
sp|P50085|PHB2_YEAST	0.543769	0.257771	0.675061	0.900666	0.0484588	0
sp|P51601|GCH1_YEAST	1	0.5771	0.443622	0.461873	0.343436	0
sp|P53184|PNC1_YEAST	1	0.39709	0.38029	0.998491	0.501027	0
sp|P53221|RL26B_YEAST	0.560114	0.648177	0.286345	0.870302	0.433095	0
sp|P53295|RBG2_YEAST	0.77615	0.364589	0.37321	0.964684	0.481628	0
sp|P53598|SUCA_YEAST	0.654276	0.664674	0.180781	0.489868	0.319137	0
sp|P53633|PRA1_YEAST	1	0.468156	0.0302575	0.772025	0.399711	0
sp|P53691|PPID_YEAST	0.50321	0.874167	0.217972	0.99981	0.437068	0
sp|P53723|YN8B_YEAST	0.733108	0.3238	0.219129	0.830966	0.415508	0
sp|P53731|ARPC2_YEAST	0.981164	0.671941	0.338335	0.978076	0.541366	0
sp|P53849|GIS2_YEAST	1	0.734416	0.14832	0.409574	0.196296	0
sp|P53852|SYC_YEAST	0.930338	0.788354	0.354388	0.86433	0.40065	0
sp|P53860|PDR16_YEAST	0.651408	0.978863	0.172665	0.758271	0.362314	0
sp|P53883|NOP13_YEAST	1	0.522932	0.110465	0.941961	0.345803	0
sp|P53909|ADE_YEAST	1	0.739654	0.249445	0.995078	0.415005	0
sp|P54838|DAK1_YEAST	0.829348	0.1266	0.71375	0.880538	0.574533	0
sp|P61830|H3_YEAST	1	0.0150305	0.381676	0.818085	0.395633	0
sp|Q00055|GPD1_YEAST	0.48051	0.533279	0.138242	0.945663	0.488238	0
sp|Q00245|RHO3_YEAST	0.424504	0.319619	0.00804658	0.875596	0.26961	0
sp|Q01080|RPA49_YEAST	1	0.36179	0.121301	0.42611	0.33396	0
sp|Q01852|TIM44_YEAST	1	0.936391	0.139003	0.640558	0.278948	0
sp|Q02776|TIM50_YEAST	0.837656	0.32276	0.115621	0.54699	0.187733	0
sp|Q02931|UTP17_YEAST	0.590203	0.707355	0.249692	0.956924	0.291895	0
sp|Q03655|GAS3_YEAST	1	0.0505821	0.700883	0.900674	0.487758	0
sp|Q03940|RUVB1_YEAST	0.180423	0.12924	0.10233	0.393172	0.19416	0
sp|Q04013|YHM2_YEAST	0.119407	0.310969	0.150468	0.829924	0.425831	0
sp|Q04305|UTP15_YEAST	0.959445	0.686524	0.33217	0.860526	0.343364	0
sp|Q04491|SEC13_YEAST	0.409469	0.783647	0.174539	0.995519	0.206322	0
sp|Q05359|ERP1_YEAST	0.583009	0.731262	0.255789	0.825136	0.445597	0
sp|Q05775|EIF3J_YEAST	0.229442	0.0498857	0.0385617	0.481423	0.111523	0
sp|Q05933|ARPC3_YEAST	0.675271	0.946994	0.222183	0.62944	0.199871	0
sp|Q07623|NOP6_YEAST	0.351829	0.415757	0.0334654	0.891236	0.208091	0
sp|Q08193|GAS5_YEAST	0.676463	0.247866	0.249734	0.917538	0.466857	0
sp|Q08641|AB140_YEAST	0.859968	0.913083	0.610468	0.698427	0.397987	0
sp|Q08686|THTR_YEAST	0.702056	0.900646	0.169167	0.611389	0.267468	0
sp|Q08687|TMA16_YEAST	0.631213	0.450133	0.218233	0.612549	0.301337	0
sp|Q08954|YP199_YEAST	0.93875	0.300017	0.194198	0.944023	0.521065	0
sp|Q08962|NIP7_YEAST	1	0.188033	0.294269	0.220225	0.109357	0
sp|Q08971|YP225_YEAST	1	0.620111	0.443672	0.981771	0.490023	0
sp|Q12024|YTM1_YEAST	0.642836	0.0690501	0.0663108	0.385526	0.180047	0
sp|Q12109|SYWC_YEAST	0.797609	0.706602	0.35467	0.921404	0.3577	0
sp|Q12154|GET3_YEAST	0.409014	0.263912	0.023808	0.726239	0.219617	0
sp|Q12211|PUS1_YEAST	0.867605	0.651365	0.589135	0.721729	0.359286	0
sp|Q12230|LSP1_YEAST	1	0.315742	0.506154	0.806384	0.488465	0
sp|Q12250|RPN5_YEAST	0.143365	0.154698	0.0542526	0.189811	0.0808327	0
sp|Q12306|SMT3_YEAST	0.70704	0.682649	0.206636	0.938369	0.413133	0
sp|Q12335|PST2_YEAST	1	0.909599	0.42722	0.862499	0.342081	0
sp|Q12363|WTM1_YEAST	0.0998556	0.233214	0.129294	0.542006	0.27714	0
sp|Q12377|RPN6_YEAST	0.871009	0.568379	0.384046	0.999815	0.244969	0
sp|Q12464|RUVB2_YEAST	0.169344	0.191171	0.143048	0.873711	0.204047	0
sp|Q12480|ETFA_YEAST	0.602142	0.245465	0.360218	0.780384	0.369114	0
sp|Q12680|GLT1_YEAST	0.999992	0.9061	0.22029	0.912707	0.337826	0
sp|Q6Q547|NOP10_YEAST	0.232186	0.44386	0.103058	0.447425	0.22235	0

## Sheet: CPTAC_C-A
Protein	MSqRob_shared	MSstats_shared	LFQ_shared	PECA_shared	eBayes_EBM_shared	Label
O00762ups|UBE2C_HUMAN_UPS	2.39084e-18	5.27439e-05	3.80572e-06	1.38278e-08	9.48148e-07	1
P00441ups|SODC_HUMAN_UPS	0.00603803	0.000224776	1.50754e-05	2.45415e-14	6.98829e-09	1
P00709ups|LALBA_HUMAN_UPS	2.18274e-22	6.73903e-05	0.000359248	2.43787e-06	4.96053e-07	1
P00915ups|CAH1_HUMAN_UPS	0.0785589	0.0108275	0.471482	0.00135883	0.000226716	1
P00918ups|CAH2_HUMAN_UPS	5.29132e-17	1.37989e-05	9.53497e-08	9.31459e-12	1.52237e-09	1
P01031ups|CO5_HUMAN_UPS	4.32744e-22	0.000149098	0.000128979	2.23832e-09	1.28048e-08	1
P01127ups|PDGFB_HUMAN_UPS	4.7308e-40	0.000107709	4.73282e-06	4.09466e-19	1.93729e-11	1
P01344ups|IGF2_HUMAN_UPS	2.0969e-13	0.000793934	1.40902e-06	4.21535e-12	6.07824e-10	1
P01375ups|TNFA_HUMAN_UPS	5.53963e-11	0.000858386	1.82753e-06	2.15834e-07	8.69741e-07	1
P02144ups|MYG_HUMAN_UPS	8.10194e-15	0.000432932	5.90977e-07	5.43657e-14	9.70392e-09	1
P02753ups|RETBP_HUMAN_UPS	1.49216e-12	0.000226474	0.000193587	1.83627e-11	2.56429e-09	1
P04040ups|CATA_HUMAN_UPS	8.39457e-19	7.68926e-05	2.53204e-07	6.9275e-17	1.61308e-08	1
P06732ups|KCRM_HUMAN_UPS	3.97724e-26	9.00189e-05	3.38538e-07	4.76535e-26	2.33338e-12	1
P08263ups|GSTA1_HUMAN_UPS	1.01598e-16	0.000860094	0.000511709	1.92733e-15	3.5718e-09	1
P08758ups|ANXA5_HUMAN_UPS	0.999992	0.000950503	9.23343e-07	1.63131e-08	5.69065e-07	1
P10145ups|IL8_HUMAN_UPS	9.82133e-23	5.75013e-05	1.0937e-05	2.3009e-08	5.04233e-07	1
P10599ups|THIO_HUMAN_UPS	3.82721e-14	5.37512e-05	1.65482e-07	1.9186e-12	2.0303e-12	1
P10636-8ups|TAU_HUMAN_UPS	1.49891e-111	1.02579e-05	3.22264e-08	7.90434e-51	2.53634e-12	1
P12081ups|SYHC_HUMAN_UPS	0.000179046	4.84182e-06	0.000494416	2.7856e-27	1.97078e-11	1
P51965ups|UB2E1_HUMAN_UPS	2.82712e-31	0.00148614	5.44033e-09	4.93613e-11	2.34112e-08	1
P61769ups|B2MG_HUMAN_UPS	6.1954e-08	2.0001e-05	1.32481e-06	1.01818e-05	2.21245e-06	1
P62937ups|PPIA_HUMAN_UPS	5.91453e-05	0.00108946	5.02569e-05	3.57797e-09	1.10876e-06	1
P63165ups|SUMO1_HUMAN_UPS	4.2719e-10	0.00131899	0.00186592	8.45731e-09	1.03493e-06	1
Q06830ups|PRDX1_HUMAN_UPS	8.33879e-33	4.37396e-05	7.43996e-05	1.60115e-16	1.25381e-10	1
sp|O13547|CCW14_YEAST	0.945029	0.26838	0.606821	0.818338	0.184306	0
sp|O13563|RPN13_YEAST	0.730607	0.930337	0.536369	0.960813	0.485878	0
sp|O14467|MBF1_YEAST	0.555115	0.0755418	0.598207	0.835391	0.359322	0
sp|P00359|G3P3_YEAST	0.875969	0.0942704	0.506036	0.978393	0.532152	0
sp|P00360|G3P1_YEAST	1	0.695518	0.372698	0.982191	0.430656	0
sp|P00498|HIS1_YEAST	0.142301	3.2284e-05	0.0476834	0.30834	0.0466302	0
sp|P00549|KPYK1_YEAST	0.553082	0.754274	0.917424	0.999998	0.626432	0
sp|P00812|ARGI_YEAST	1	0.988715	0.289868	0.611949	0.372874	0
sp|P00817|IPYR_YEAST	0.999975	0.132304	0.308256	0.954805	0.473107	0
sp|P00890|CISY1_YEAST	0.315714	0.502226	0.554975	0.673201	0.193774	0
sp|P00899|TRPE_YEAST	0.674376	0.239819	0.248502	0.999898	0.312443	0
sp|P00924|ENO1_YEAST	1	0.921282	0.918827	0.99985	0.685718	0
sp|P00925|ENO2_YEAST	0.639336	0.62514	0.205448	0.994844	0.499466	0
sp|P00937|TRPG_YEAST	1	0.627399	0.130546	0.760353	0.375523	0
sp|P00950|PMG1_YEAST	0.772384	0.426253	0.640591	0.999992	0.523578	0
sp|P00958|SYMC_YEAST	0.74506	0.959924	0.860405	0.972009	0.35385	0
sp|P01120|RAS2_YEAST	0.999989	0.547167	0.745207	0.943152	0.472569	0
sp|P01123|YPT1_YEAST	1	0.893839	0.910434	0.797558	0.300942	0
sp|P02309|H4_YEAST	0.391092	0.197255	0.912065	0.798115	0.67313	0
sp|P02400|RLA4_YEAST	0.493969	0.866439	0.472983	0.985245	0.511836	0
sp|P02406|RL28_YEAST	1	0.449542	0.199136	0.947892	0.466724	0
sp|P02829|HSP82_YEAST	1	0.281545	0.149221	0.425629	0.247818	0
sp|P02992|EFTU_YEAST	0.63802	0.154511	0.412033	0.999655	0.499077	0
sp|P02994|EF1A_YEAST	0.159862	0.193925	0.792726	0.999845	0.403663	0
sp|P03965|CARB_YEAST	0.807931	0.509588	0.349336	0.565584	0.125292	0
sp|P04046|PUR1_YEAST	0.747032	0.536185	0.82876	0.976859	0.697175	0
sp|P04147|PABP_YEAST	0.738557	0.770024	0.748402	1	0.745151	0
sp|P04456|RL25_YEAST	0.884509	0.658131	0.44035	0.992418	0.687274	0
sp|P04801|SYTC_YEAST	0.935365	0.481429	0.570022	0.920965	0.423209	0
sp|P04802|SYDC_YEAST	0.999993	0.837166	0.50254	1	0.341189	0
sp|P04806|HXKA_YEAST	0.551777	0.963732	0.361681	0.952156	0.516981	0
sp|P04807|HXKB_YEAST	0.27767	0.0885594	0.0529024	0.445426	0.149132	0
sp|P05317|RLA0_YEAST	0.945326	0.117602	0.214239	0.986084	0.17572	0
sp|P05319|RLA2_YEAST	0.898821	0.56614	0.143441	0.712303	0.291735	0
sp|P05626|ATPF_YEAST	1	0.512228	0.77348	0.99886	0.530959	0
sp|P05694|METE_YEAST	0.629162	0.311804	0.530269	1	0.575141	0
sp|P05739|RL6B_YEAST	0.967092	0.886267	0.470416	0.808407	0.380356	0
sp|P05750|RS3_YEAST	0.657449	0.624967	0.773256	1	0.700199	0
sp|P05755|RS9B_YEAST	1	0.00117619	0.569989	0.439617	0.187142	0
sp|P05756|RS13_YEAST	0.689186	0.49855	0.64161	0.999451	0.672046	0
sp|P05759|RS31_YEAST	0.958515	0.492686	0.668897	0.92398	0.507332	0
sp|P06101|CDC37_YEAST	0.383781	0.189349	0.64926	0.0569488	0.0344976	0
sp|P06208|LEU1_YEAST	0.464982	0.255699	0.217714	0.984555	0.118708	0
sp|P06780|RHO1_YEAST	0.997079	0.708758	0.562167	0.999722	0.576627	0
sp|P06786|TOP2_YEAST	0.355358	0.890135	0.137612	0.9427	0.510527	0
sp|P07170|KAD2_YEAST	0.999985	0.923241	0.690374	0.999851	0.76013	0
sp|P07213|TOM70_YEAST	1	0.826219	0.700056	0.989677	0.614977	0
sp|P07245|C1TC_YEAST	0.816521	0.741559	0.59834	1	0.660214	0
sp|P07257|QCR2_YEAST	0.553398	0.93661	0.311925	0.607423	0.293354	0
sp|P07259|PYR1_YEAST	0.0776546	0.0284121	0.362912	1	0.604131	0
sp|P07260|IF4E_YEAST	1	0.474384	0.303436	0.827971	0.381996	0
sp|P07284|SYSC_YEAST	0.405536	0.332822	0.197934	0.999997	0.325524	0
sp|P07347|ARD1_YEAST	0.859022	0.729332	0.588864	0.589014	0.28948	0
sp|P07806|SYV_YEAST	0.316703	0.794058	0.352845	0.998742	0.345181	0
sp|P07991|OAT_YEAST	0.721175	0.252915	0.229818	0.255111	0.172684	0
sp|P08417|FUMH_YEAST	0.722467	0.497307	0.699763	0.999295	0.415016	0
sp|P09064|IF2B_YEAST	0.342605	0.196256	0.528385	0.982101	0.00996694	0
sp|P09440|C1TM_YEAST	0.990503	0.798645	0.328824	1	0.280154	0
sp|P09624|DLDH_YEAST	0.730866	0.815382	0.145843	0.548444	0.287646	0
sp|P09733|TBA1_YEAST	0.66241	0.886523	0.403049	0.914663	0.242262	0
sp|P10080|SSBP1_YEAST	0.835369	0.706376	0.432656	0.938425	0.145505	0
sp|P10081|IF4A_YEAST	0.560298	0.627149	0.115834	1	0.49792	0
sp|P10614|CP51_YEAST	0.875676	0.374016	0.292074	0.978367	0.12643	0
sp|P11154|PYC1_YEAST	0.354624	0.266748	0.395133	0.655496	0.335378	0
sp|P11484|SSB1_YEAST	1	0.611203	0.348212	0.761184	0.364344	0
sp|P11745|RNA1_YEAST	0.999868	0.00674732	0.621343	0.573819	0.187615	0
sp|P12385|ERF1_YEAST	0.437518	0.489774	0.701849	0.93018	0.03704	0
sp|P12612|TCPA_YEAST	0.469751	0.425289	0.166415	0.572388	0.175043	0
sp|P12695|ODP2_YEAST	1	0.547361	0.176688	0.999615	0.181198	0
sp|P12709|G6PI_YEAST	1	0.916208	0.84214	0.99981	0.501513	0
sp|P12945|NAT1_YEAST	0.653025	0.925837	0.542692	0.886157	0.382246	0
sp|P13298|PYRE_YEAST	1	0.744621	0.53254	0.982828	0.487999	0
sp|P13663|DHAS_YEAST	0.843968	0.505588	0.977307	0.999946	0.654444	0
sp|P14120|RL30_YEAST	0.246604	0.0492301	0.206084	0.981966	0.0965189	0
sp|P14126|RL3_YEAST	0.846339	0.745011	0.507454	1	0.583999	0
sp|P14540|ALF_YEAST	1	0.250502	0.328384	0.974681	0.347583	0
sp|P14832|CYPH_YEAST	1	0.286127	0.738537	0.997197	0.391281	0
sp|P14843|AROF_YEAST	0.677327	0.0338096	0.0303539	0.131687	0.0744871	0
sp|P15108|HSC82_YEAST	0.218782	0.309216	0.43847	0.995636	0.153532	0
sp|P15180|SYKC_YEAST	0.989268	0.682843	0.757333	1	0.49325	0
sp|P15303|SEC23_YEAST	0.121331	0.465522	0.261841	0.514759	0.240405	0
sp|P15454|KGUA_YEAST	0.61448	0.300398	0.556752	0.999864	0.490993	0
sp|P15624|SYFB_YEAST	0.826036	0.301831	0.539962	0.994543	0.43686	0
sp|P15646|FBRL_YEAST	1	0.771012	0.4848	0.997525	0.492142	0
sp|P15891|ABP1_YEAST	0.672892	0.625381	0.478883	0.968203	0.453534	0
sp|P15992|HSP26_YEAST	0.212724	0.127335	0.0747994	0.932908	0.574642	0
sp|P16120|THRC_YEAST	0.398721	0.645654	0.503684	0.999967	0.487787	0
sp|P16140|VATB_YEAST	1	0.604225	0.697605	0.996822	0.46592	0
sp|P16521|EF3A_YEAST	0.864212	0.717926	0.635191	1	0.770013	0
sp|P16550|APA1_YEAST	0.784881	0.42463	0.606199	0.699521	0.396654	0
sp|P16603|NCPR_YEAST	0.125919	0.129879	0.0872091	0.59166	0.27477	0
sp|P16861|PFKA1_YEAST	0.880816	0.664276	0.674474	1	0.412765	0
sp|P17255|VATA_YEAST	0.858539	0.574343	0.6162	0.999999	0.487713	0
sp|P17505|MDHM_YEAST	0.853486	0.249821	0.815459	0.999556	0.43659	0
sp|P17555|CAP_YEAST	1	0.0106727	0.0535915	0.290612	0.0923606	0
sp|P17695|GLRX2_YEAST	1	0.0677706	0.207337	0.52046	0.244408	0
sp|P17709|HXKG_YEAST	0.977069	0.883236	0.359578	0.823391	0.425263	0
sp|P18562|UPP_YEAST	0.902607	0.572422	0.384538	0.861064	0.369294	0
sp|P18759|SEC18_YEAST	0.334933	0.0572247	0.330846	0.729669	0.275659	0
sp|P19097|FAS2_YEAST	0.342667	0.599502	0.742934	1	0.382363	0
sp|P19414|ACON_YEAST	0.493666	0.542606	0.38704	0.992755	0.247999	0
sp|P19881|PNPP_YEAST	0.938652	0.342796	0.391014	0.999896	0.568047	0
sp|P19882|HSP60_YEAST	0.651122	0.334944	0.571215	0.999999	0.675255	0
sp|P20051|PYRC_YEAST	0.994469	0.953521	0.495404	0.943368	0.318808	0
sp|P20449|DBP5_YEAST	0.90173	0.744504	0.689437	0.999986	0.581384	0
sp|P20606|SAR1_YEAST	1	0.989996	0.819022	0.999443	0.65	0
sp|P20676|NUP1_YEAST	1	0.166878	0.379409	0.684297	0.3256	0
sp|P21147|ACO1_YEAST	0.584727	0.823835	0.422018	0.853041	0.257132	0
sp|P21243|PSA1_YEAST	0.819817	0.855188	0.447969	0.917451	0.470703	0
sp|P21264|PUR6_YEAST	0.466027	0.231763	0.434462	0.136879	0.0767047	0
sp|P21304|PWP1_YEAST	0.883316	0.911717	0.50224	0.946961	0.505298	0
sp|P21524|RIR1_YEAST	0.961866	0.644835	0.35063	0.709747	0.407166	0
sp|P21734|UBC1_YEAST	0.911797	0.993938	0.144091	0.460114	0.247714	0
sp|P21827|RCC1_YEAST	0.999983	0.0317113	0.0500475	0.0749298	0.0525969	0
sp|P21965|MCK1_YEAST	0.810503	0.745414	0.35397	0.694718	0.364949	0
sp|P22137|CLH_YEAST	0.906029	0.531973	0.692595	1	0.623548	0
sp|P22138|RPA2_YEAST	1	0.0725029	0.377912	0.469459	0.125422	0
sp|P22146|GAS1_YEAST	0.843259	0.500465	0.805398	0.997262	0.59568	0
sp|P22203|VATE_YEAST	1	0.216606	0.584959	0.999923	0.138131	0
sp|P22217|TRX1_YEAST	0.49225	0.252643	0.339511	0.813886	0.355949	0
sp|P22803|TRX2_YEAST	0.844968	0.673453	0.638886	0.99213	0.439608	0
sp|P22943|HSP12_YEAST	0.698177	0.141158	0.524996	0.349201	0.159006	0
sp|P23254|TKT1_YEAST	0.775917	0.508214	0.62326	0.999879	0.637442	0
sp|P23542|AATC_YEAST	0.486955	0.380894	0.244366	0.961002	0.388309	0
sp|P23585|HXT2_YEAST	0.817768	0.112818	0.184436	0.646653	0.18663	0
sp|P23638|PSA3_YEAST	0.997875	0.875734	0.536652	0.856875	0.388562	0
sp|P23639|PSA2_YEAST	0.73964	0.194748	0.274576	0.945594	0.457206	0
sp|P24280|SEC14_YEAST	0.700219	0.793311	0.903316	0.940957	0.660765	0
sp|P24783|DBP2_YEAST	1	0.511554	0.501202	0.975481	0.180729	0
sp|P25045|LCB1_YEAST	1	0.100529	0.493934	0.598578	0.304322	0
sp|P25293|NAP1_YEAST	0.985088	0.217068	0.58272	0.978563	0.289591	0
sp|P25294|SIS1_YEAST	0.121248	0.370042	0.164384	0.471022	0.166035	0
sp|P25296|CANB_YEAST	1	0.561712	0.284738	0.625728	0.306619	0
sp|P25340|ERG4_YEAST	0.457747	0.667603	0.700878	0.931884	0.480693	0
sp|P25342|CDC10_YEAST	1	0.863618	0.384577	0.818802	0.395331	0
sp|P25343|RV161_YEAST	0.975522	0.921828	0.791176	0.306179	0.294185	0
sp|P25379|STDH_YEAST	0.614329	0.147392	0.258906	0.894028	0.164469	0
sp|P25443|RS2_YEAST	1	0.712611	0.672013	0.999974	0.474214	0
sp|P25586|KRR1_YEAST	0.750995	0.508481	0.398165	0.519079	0.249162	0
sp|P25605|ILV6_YEAST	0.84753	0.712973	0.424305	0.919684	0.5946	0
sp|P25694|CDC48_YEAST	0.989442	0.631471	0.77703	0.999997	0.572579	0
sp|P25719|CYPC_YEAST	1	0.893743	0.60568	0.845054	0.280568	0
sp|P26321|RL5_YEAST	0.785975	0.780286	0.741225	1	0.655879	0
sp|P26637|SYLC_YEAST	0.33818	0.0853475	0.370004	0.930196	0.441361	0
sp|P27476|NSR1_YEAST	0.643024	0.449915	0.702055	0.999494	0.478638	0
sp|P27614|CBPS_YEAST	0.510999	0.979685	0.407434	0.639974	0.313241	0
sp|P27616|PUR7_YEAST	0.975144	0.645826	0.27887	0.348161	0.0865424	0
sp|P27692|SPT5_YEAST	0.403342	0.350795	0.292448	0.562725	0.361244	0
sp|P28000|RPAC2_YEAST	1	0.624769	0.5359	0.952152	0.477509	0
sp|P28007|GAR1_YEAST	0.743159	0.222589	0.251217	0.689094	0.324704	0
sp|P28272|PYRD_YEAST	1	0.344211	0.558364	0.994517	0.577634	0
sp|P28319|CWP1_YEAST	0.620982	0.125227	0.372555	0.606384	0.249944	0
sp|P28707|SBA1_YEAST	1	0.548021	0.644827	0.946065	0.335023	0
sp|P28834|IDH1_YEAST	0.758479	0.508946	0.553382	0.890125	0.369811	0
sp|P29453|RL8B_YEAST	0.876389	0.736736	0.576626	0.999973	0.470436	0
sp|P29509|TRXB1_YEAST	0.830546	0.552767	0.249216	0.89589	0.4622	0
sp|P29547|EF1G1_YEAST	1	0.79158	0.765784	0.989807	0.2327	0
sp|P30624|LCF1_YEAST	1	0.426017	0.872349	0.184583	0.141888	0
sp|P30656|PSB5_YEAST	0.710652	0.517003	0.140932	0.538963	0.0655354	0
sp|P31116|DHOM_YEAST	0.739593	0.741817	0.457819	0.988074	0.549847	0
sp|P31373|CYS3_YEAST	0.999632	0.720444	0.543374	0.962165	0.312399	0
sp|P31412|VATC_YEAST	1	0.189541	0.256629	0.353395	0.214052	0
sp|P32074|COPG_YEAST	0.960239	0.557528	0.681092	0.999922	0.404068	0
sp|P32263|P5CR_YEAST	0.685518	0.25422	0.47731	0.996739	0.660587	0
sp|P32264|PROB_YEAST	0.127371	0.529811	0.381322	0.39907	0.196822	0
sp|P32352|ERG2_YEAST	0.340407	0.193836	0.102632	0.419187	0.187284	0
sp|P32368|SAC1_YEAST	0.33288	0.68855	0.0252681	0.758324	0.148941	0
sp|P32377|MVD1_YEAST	1	0.159677	0.0775406	0.710465	0.351634	0
sp|P32379|PSA5_YEAST	0.486359	0.369002	0.254995	0.671553	0.258262	0
sp|P32381|ARP2_YEAST	0.680523	0.0838523	0.298891	0.0828583	0.0218395	0
sp|P32386|YBT1_YEAST	0.367188	0.104166	0.456962	0.396075	0.0379653	0
sp|P32471|EF1B_YEAST	1	0.492266	0.870131	0.979792	0.00218986	0
sp|P32473|ODPB_YEAST	1	0.01548	0.230929	0.486299	0.123118	0
sp|P32486|KRE6_YEAST	0.999965	0.459644	0.276116	0.459421	0.308933	0
sp|P32495|NHP2_YEAST	0.894915	0.400435	0.895278	0.990238	0.573853	0
sp|P32497|EIF3C_YEAST	0.882441	0.847702	0.909182	1	0.359685	0
sp|P32499|NUP2_YEAST	0.73332	0.913963	0.603513	0.807131	0.496256	0
sp|P32521|PAN1_YEAST	0.535355	0.205977	0.499662	0.998138	0.417642	0
sp|P32558|SPT16_YEAST	1	0.0772637	0.264167	0.0878343	0.078172	0
sp|P32588|PUB1_YEAST	0.772485	0.533652	0.549175	0.88836	0.334856	0
sp|P32589|HSP7F_YEAST	0.715896	0.456475	0.434188	1	0.187356	0
sp|P32602|SEC17_YEAST	1	0.139532	0.928521	0.998092	0.566788	0
sp|P32621|GDA1_YEAST	0.317094	0.426515	0.158837	0.82854	0.225404	0
sp|P32791|FRE1_YEAST	1	0.198403	0.100812	0.827462	0.567708	0
sp|P32861|UGPA1_YEAST	0.644073	0.359786	0.656799	0.991911	0.150004	0
sp|P32905|RSSA1_YEAST	0.556212	0.630596	0.434469	0.53809	0.264838	0
sp|P32911|SUI1_YEAST	0.542022	0.162388	0.287576	0.133803	0.0495301	0
sp|P32939|YPT7_YEAST	0.836652	0.815807	0.411354	0.992263	0.501829	0
sp|P33201|MRT4_YEAST	1	0.336071	0.188366	0.755702	0.364114	0
sp|P33297|PRS6A_YEAST	0.169452	0.175696	0.300763	0.720468	0.246578	0
sp|P33299|PRS7_YEAST	0.999987	0.292871	0.211225	0.78996	0.366169	0
sp|P33302|PDR5_YEAST	0.348359	0.259128	0.839338	0.999889	0.826099	0
sp|P33330|SERC_YEAST	0.617976	0.907357	0.534053	0.962172	0.658813	0
sp|P33331|NTF2_YEAST	1	0.902706	0.396675	0.943192	0.545646	0
sp|P33338|SLA2_YEAST	0.865911	0.359795	0.992138	0.990672	0.498229	0
sp|P33399|LHP1_YEAST	0.967432	0.909865	0.266052	0.9917	0.258981	0
sp|P33442|RS3A1_YEAST	0.596433	0.464593	0.554797	0.89953	0.385604	0
sp|P33767|OSTB_YEAST	1	0.759799	0.118987	0.754933	0.327893	0
sp|P33775|PMT1_YEAST	0.963767	0.584794	0.246986	0.682873	0.219057	0
sp|P33892|GCN1_YEAST	0.631723	0.782562	0.59164	0.997788	0.206237	0
sp|P34078|LTV1_YEAST	0.305589	0.0577333	0.1048	0.199317	0.0894171	0
sp|P34167|IF4B_YEAST	1	0.362257	0.499724	0.989948	0.217232	0
sp|P34216|EDE1_YEAST	0.699077	0.401077	0.1581	0.962639	0.26525	0
sp|P34227|PRX1_YEAST	0.965045	0.94508	0.443407	0.915784	0.473336	0
sp|P34730|BMH2_YEAST	0.89166	0.895883	0.583304	0.999994	0.573551	0
sp|P35197|GCS1_YEAST	0.99999	0.827134	0.538699	0.911811	0.527448	0
sp|P35691|TCTP_YEAST	0.774475	0.827907	0.594343	0.999753	0.437683	0
sp|P35719|MRP8_YEAST	0.922083	0.380464	0.229827	0.903279	0.261247	0
sp|P35732|DEF1_YEAST	0.98175	0.923854	0.401607	0.812061	0.286345	0
sp|P36008|EF1G2_YEAST	0.99794	0.704889	0.533913	0.987537	0.339758	0
sp|P36010|NDK_YEAST	0.635507	0.883293	0.593805	0.993542	0.521222	0
sp|P36015|YKT6_YEAST	0.999988	0.599973	0.511006	0.999982	0.542004	0
sp|P36018|YPT52_YEAST	0.0290054	0.15721	0.349916	0.918663	0.471322	0
sp|P36051|MCD4_YEAST	0.464455	0.724885	0.28751	0.999999	0.399966	0
sp|P36105|RL14A_YEAST	0.329171	0.000866044	0.622358	0.549639	0.296043	0
sp|P36114|YKR18_YEAST	0.201487	0.191616	0.243882	0.0494332	0.0620771	0
sp|P36160|RPF2_YEAST	0.999929	0.572391	0.634448	0.359109	0.303955	0
sp|P36421|SYYC_YEAST	0.934783	0.89492	0.484972	0.890291	0.601463	0
sp|P37898|AAP1_YEAST	0.236738	0.688808	0.0539085	0.842561	0.241719	0
sp|P38009|PUR92_YEAST	0.688269	0.153478	0.544175	0.703378	0.339537	0
sp|P38011|GBLP_YEAST	1	0.252254	0.435406	0.999682	0.472687	0
sp|P38013|AHP1_YEAST	0.591235	0.9514	0.609088	0.926319	0.545223	0
sp|P38061|RL32_YEAST	0.999726	0.451015	0.612126	1	0.51042	0
sp|P38075|PDX3_YEAST	1	0.148145	0.752889	0.72978	0.519931	0
sp|P38088|SYG_YEAST	0.548372	0.445577	0.387905	0.99996	0.376146	0
sp|P38116|ARL1_YEAST	0.740476	0.488574	0.691101	0.685286	0.333857	0
sp|P38203|LSM2_YEAST	1	0.0725387	0.0203546	0.307431	0.174157	0
sp|P38205|NCL1_YEAST	0.765516	0.706475	0.561964	0.785357	0.288654	0
sp|P38219|OLA1_YEAST	0.46054	0.274588	0.329783	0.9979	0.304551	0
sp|P38248|ECM33_YEAST	0.99999	0.493791	0.71209	0.89003	0.310328	0
sp|P38249|EIF3A_YEAST	0.392274	0.432725	0.478755	0.999988	0.399597	0
sp|P38250|IST2_YEAST	0.920787	0.786465	0.54403	0.820619	0.253347	0
sp|P38286|MKAR_YEAST	1	0.507041	0.897188	0.987058	0.333951	0
sp|P38328|ARPC1_YEAST	0.245407	0.113552	0.930756	0.150125	0.0859272	0
sp|P38353|SSH1_YEAST	1	0.525973	0.359243	0.544885	0.258467	0
sp|P38624|PSB1_YEAST	1	0.34781	0.649341	0.737973	0.362315	0
sp|P38625|GUAA_YEAST	0.972157	0.57555	0.54571	0.999857	0.52173	0
sp|P38626|NCB5R_YEAST	0.713942	0.544471	0.829313	0.679713	0.391709	0
sp|P38701|RS20_YEAST	0.759047	0.983466	0.678161	0.985277	0.558866	0
sp|P38707|SYNC_YEAST	0.598756	0.861358	0.452927	0.99997	0.462175	0
sp|P38708|YHI0_YEAST	0.682368	0.647866	0.384194	0.984999	0.424064	0
sp|P38715|GRE3_YEAST	0.397649	0.186017	0.865118	0.998945	0.54797	0
sp|P38788|SSZ1_YEAST	0.717214	0.885141	0.275335	0.999863	0.437408	0
sp|P38817|GGA2_YEAST	0.841766	0.603802	0.402485	0.574904	0.28898	0
sp|P38858|SOL3_YEAST	0.983129	0.454333	0.413151	0.867765	0.462005	0
sp|P38861|NMD3_YEAST	1	0.520227	0.135549	0.273853	0.136003	0
sp|P38879|NACA_YEAST	0.999868	0.0713029	0.244458	0.323903	0.16751	0
sp|P38891|BCA1_YEAST	0.58069	0.596969	0.162739	0.603508	0.427624	0
sp|P38910|CH10_YEAST	1	0.59016	0.596187	0.714073	0.185711	0
sp|P38911|FKBP3_YEAST	0.822675	0.817448	0.072226	0.869603	0.332634	0
sp|P38934|BFR1_YEAST	0.965282	0.742147	0.767874	0.996117	0.128567	0
sp|P38968|SEC31_YEAST	0.813194	0.161771	0.540901	0.424806	0.21563	0
sp|P38986|ASPG1_YEAST	0.659501	0.362422	0.557959	0.959899	0.474793	0
sp|P39015|STM1_YEAST	0.99997	0.526702	0.460046	0.999991	0.517659	0
sp|P39076|TCPB_YEAST	1	0.207845	0.685608	0.885264	0.334454	0
sp|P39522|ILV3_YEAST	0.405735	0.0481994	0.386062	0.868203	0.154911	0
sp|P39676|FHP_YEAST	0.994489	0.0232248	0.640636	0.983529	0.367282	0
sp|P39730|IF2P_YEAST	0.348643	0.838631	0.771816	0.968901	0.45875	0
sp|P39935|IF4F1_YEAST	0.314181	0.943743	0.60872	0.962447	0.735988	0
sp|P39940|RSP5_YEAST	0.999973	0.616793	0.137678	0.777726	0.294355	0
sp|P39954|SAHH_YEAST	0.646621	0.482811	0.444725	1	0.572402	0
sp|P39958|GDI1_YEAST	0.999994	0.888799	0.1681	0.731231	0.301772	0
sp|P39986|ATC6_YEAST	0.999685	0.10827	0.203189	0.884245	0.233737	0
sp|P39990|SNU13_YEAST	0.999997	0.591787	0.684176	0.580894	0.292135	0
sp|P40016|RPN3_YEAST	0.244529	0.245952	0.287048	0.917478	0.00108202	0
sp|P40032|TPA1_YEAST	0.920496	0.941501	0.252291	0.815501	0.319072	0
sp|P40037|HMF1_YEAST	0.99997	0.904326	0.186843	0.622957	0.290139	0
sp|P40047|ALDH5_YEAST	0.754492	0.751754	0.19455	0.607005	0.175204	0
sp|P40069|IMB4_YEAST	0.737959	0.293845	0.495847	0.982336	0.244187	0
sp|P40075|SCS2_YEAST	0.916426	0.336574	0.656733	0.995441	0.629453	0
sp|P40093|YEY6_YEAST	0.45551	0.211292	0.168224	0.855942	0.299913	0
sp|P40150|SSB2_YEAST	1	0.249515	0.485134	0.703365	0.334437	0
sp|P40185|MMF1_YEAST	0.329187	0.141042	0.290443	0.740485	0.320507	0
sp|P40215|NDH1_YEAST	0.501053	0.210026	0.64675	0.976011	0.402421	0
sp|P40302|PSA6_YEAST	0.540415	0.767177	0.147457	0.646423	0.286586	0
sp|P40319|ELO3_YEAST	0.70389	0.915205	0.529057	0.991471	0.575079	0
sp|P40327|PRS4_YEAST	0.982154	0.474739	0.684841	0.972049	0.611508	0
sp|P40413|TCPE_YEAST	0.583145	0.849962	0.170212	0.878096	0.424306	0
sp|P40509|COPE_YEAST	0.99988	0.325722	0.14526	0.463608	0.35308	0
sp|P40518|ARPC5_YEAST	0.769898	0.587503	0.515044	0.967672	0.495173	0
sp|P40825|SYA_YEAST	0.913766	0.588129	0.422969	1	0.289529	0
sp|P40961|PHB1_YEAST	0.979759	0.874134	0.473715	0.377807	0.244225	0
sp|P40970|LCB2_YEAST	1	0.351456	0.581413	0.660942	0.243812	0
sp|P40991|NOP2_YEAST	0.687603	0.482254	0.622725	0.998577	0.227757	0
sp|P41056|RL33B_YEAST	0.162834	0.253435	0.381936	0.582273	0.284903	0
sp|P41057|RS29A_YEAST	0.972073	0.102587	0.618455	0.939331	0.482322	0
sp|P41338|THIL_YEAST	0.653557	0.730178	0.465464	0.999998	0.49749	0
sp|P41807|VATH_YEAST	0.704213	0.573588	0.283981	0.290652	0.210759	0
sp|P41811|COPB2_YEAST	0.46881	0.201384	0.194606	0.606264	0.132444	0
sp|P41920|YRB1_YEAST	1	0.568313	0.651944	0.998809	0.590524	0
sp|P42838|LEM3_YEAST	0.213671	0.0556945	0.72884	0.981281	0.614819	0
sp|P43555|EMP47_YEAST	0.768075	0.7818	0.408353	0.641341	0.313574	0
sp|P43593|UBP6_YEAST	1	0.661943	0.188564	0.256835	0.131558	0
sp|P43616|DUG1_YEAST	1	0.0266698	0.303279	0.947447	0.51226	0
sp|P46655|SYEC_YEAST	0.156144	0.99255	0.819973	0.99928	0.453643	0
sp|P47089|DENR_YEAST	0.0855562	0.14062	0.141693	0.045959	0.0248932	0
sp|P47117|ARP3_YEAST	1	0.908306	0.173943	0.518274	0.26333	0
sp|P47122|GPN1_YEAST	1	0.538432	0.243254	0.837492	0.2287	0
sp|P47143|ADK_YEAST	1	0.503077	0.386327	0.999999	0.511283	0
sp|P47154|STE24_YEAST	0.73435	0.489499	0.308204	0.312091	0.0209674	0
sp|P47176|BCA2_YEAST	0.348646	0.0667816	0.0517476	0.562553	0.0815778	0
sp|P47912|LCF4_YEAST	0.583351	0.556681	0.667419	0.999984	0.587125	0
sp|P48164|RS7B_YEAST	0.555238	0.558958	0.592121	0.997914	0.554221	0
sp|P48606|TBCA_YEAST	0.901942	0.602896	0.600657	0.994421	0.486231	0
sp|P48813|GNP1_YEAST	1	0.803982	0.216402	0.357814	0.180422	0
sp|P48836|VATG_YEAST	0.223203	0.00737079	0.137342	0.596731	0.219702	0
sp|P49435|APT1_YEAST	0.898234	0.56022	0.566294	0.939661	0.358622	0
sp|P49573|CTR1_YEAST	0.250192	0.0884944	0.0995495	0.649305	0.0414824	0
sp|P50085|PHB2_YEAST	0.344553	0.125988	0.0186439	0.043019	0.00445502	0
sp|P50094|IMDH4_YEAST	0.902624	0.746754	0.348773	0.399041	0.224599	0
sp|P50095|IMDH3_YEAST	0.999989	0.566175	0.240195	0.587481	0.371905	0
sp|P51601|GCH1_YEAST	1	0.0316144	0.414236	0.185805	0.0168597	0
sp|P52553|PFD6_YEAST	0.730593	0.862731	0.223344	0.953893	0.40592	0
sp|P53011|SEH1_YEAST	0.806061	0.882768	0.624881	0.824472	0.360182	0
sp|P53090|ARO8_YEAST	0.322041	0.667114	0.387203	0.968349	0.439326	0
sp|P53163|MNP1_YEAST	0.273379	0.273139	0.692855	0.285322	0.152725	0
sp|P53184|PNC1_YEAST	1	0.415099	0.458181	0.965312	0.445005	0
sp|P53221|RL26B_YEAST	0.957678	0.942298	0.545916	0.662743	0.281116	0
sp|P53235|EIF2A_YEAST	0.708283	0.707393	0.668379	0.735027	0.391128	0
sp|P53261|PESC_YEAST	0.899364	0.659678	0.199413	0.999999	0.447419	0
sp|P53295|RBG2_YEAST	0.893863	0.2713	0.395423	0.61216	0.193134	0
sp|P53303|ZPR1_YEAST	0.999997	0.741944	0.438868	0.682631	0.286821	0
sp|P53312|SUCB_YEAST	0.832008	0.984749	0.558377	0.98409	0.556684	0
sp|P53633|PRA1_YEAST	1	0.916295	0.634891	0.639636	0.304616	0
sp|P53731|ARPC2_YEAST	0.77651	0.710444	0.581579	0.759134	0.313709	0
sp|P53849|GIS2_YEAST	1	0.472901	0.189093	0.98178	0.354265	0
sp|P53852|SYC_YEAST	0.63093	0.620624	0.225154	0.420567	0.210387	0
sp|P53860|PDR16_YEAST	0.515428	0.546573	0.248753	0.700068	0.329809	0
sp|P53909|ADE_YEAST	1	0.919917	0.583867	0.545833	0.256348	0
sp|P54838|DAK1_YEAST	0.959322	0.240012	0.566517	0.488585	0.204527	0
sp|P54839|HMCS_YEAST	0.520028	0.699232	0.345863	0.995691	0.497339	0
sp|P54885|PROA_YEAST	0.715601	0.562953	0.227334	0.999408	0.333714	0
sp|P60010|ACT_YEAST	0.676026	0.993626	0.426968	0.999915	0.704614	0
sp|P61830|H3_YEAST	1	0.0344619	0.438364	0.786916	0.379556	0
sp|Q00055|GPD1_YEAST	0.512993	0.76589	0.507869	0.841601	0.16303	0
sp|Q01080|RPA49_YEAST	1	0.11912	0.122102	0.261745	0.0851758	0
sp|Q01852|TIM44_YEAST	1	0.969753	0.152983	0.592087	0.179053	0
sp|Q01939|PRS8_YEAST	0.97223	0.845809	0.709673	0.794419	0.182421	0
sp|Q02753|RL21A_YEAST	0.415544	0.192245	0.476655	0.151332	0.0697004	0
sp|Q03048|COFI_YEAST	1	0.842425	0.563485	0.938977	0.461602	0
sp|Q03161|YMY9_YEAST	1	0.386196	0.522103	0.972581	0.369083	0
sp|Q03195|RLI1_YEAST	0.241803	0.145348	0.477987	0.198756	0.126567	0
sp|Q03640|TCB3_YEAST	1	0.454037	0.247408	0.895549	0.387526	0
sp|Q03862|ARX1_YEAST	1	0.546482	0.204813	0.976407	0.549573	0
sp|Q03940|RUVB1_YEAST	0.842624	0.636707	0.69893	0.914099	0.361653	0
sp|Q04013|YHM2_YEAST	0.201718	0.536436	0.263079	0.813825	0.414091	0
sp|Q04067|EIF3G_YEAST	1	0.100303	0.665133	0.986765	0.407475	0
sp|Q04305|UTP15_YEAST	0.858659	0.248533	0.156476	0.330068	0.129943	0
sp|Q04344|HNT1_YEAST	1	0.0467127	0.718614	0.999877	0.637042	0
sp|Q04439|MYO5_YEAST	0.902757	0.939874	0.520739	0.513334	0.253404	0
sp|Q04491|SEC13_YEAST	0.440816	0.983634	0.114533	0.868581	0.331155	0
sp|Q04636|POB3_YEAST	0.761856	0.721148	0.333257	0.935437	0.297113	0
sp|Q04660|ERB1_YEAST	0.556873	0.38959	0.21699	0.626195	0.306224	0
sp|Q04869|YM94_YEAST	0.995851	0.537764	0.430431	0.681734	0.338858	0
sp|Q04894|ADH6_YEAST	1	0.469027	0.598905	0.844193	0.411226	0
sp|Q05016|YM71_YEAST	0.160557	0.28258	0.312804	0.590311	0.265019	0
sp|Q05022|RRP5_YEAST	1	0.0369229	0.352246	0.990681	0.206669	0
sp|Q05359|ERP1_YEAST	0.464999	0.215191	0.213107	0.545729	0.270688	0
sp|Q05775|EIF3J_YEAST	0.507021	0.495495	0.2678	0.704549	0.288006	0
sp|Q05933|ARPC3_YEAST	0.826822	0.907371	0.325605	0.840484	0.355754	0
sp|Q06103|RPN7_YEAST	1	0.573888	0.25691	0.664551	0.378124	0
sp|Q06205|FKBP4_YEAST	0.894423	0.423791	0.665102	0.620065	0.331612	0
sp|Q06252|YL179_YEAST	0.783399	0.0294577	0.131869	0.835848	0.392979	0
sp|Q06440|CORO_YEAST	0.500769	0.544879	0.611025	0.999994	0.327716	0
sp|Q06489|MTNA_YEAST	0.999986	0.846144	0.299008	0.95079	0.371562	0
sp|Q06631|BFR2_YEAST	1	0.919597	0.749141	0.541273	0.130665	0
sp|Q07478|SUB2_YEAST	0.731339	0.379173	0.375875	0.65655	0.108903	0
sp|Q07541|YD121_YEAST	0.855531	0.576697	0.220753	0.561325	0.257132	0
sp|Q07623|NOP6_YEAST	0.700285	0.175221	0.0157861	0.0904611	0.0233401	0
sp|Q08193|GAS5_YEAST	0.898046	0.462845	0.121814	0.397895	0.187376	0
sp|Q08235|BRX1_YEAST	0.802853	0.657578	0.0317566	0.416929	0.199011	0
sp|Q08245|ZEO1_YEAST	0.245469	0.609051	0.655593	0.927097	0.246201	0
sp|Q08641|AB140_YEAST	0.332767	0.462764	0.268936	0.621116	0.160797	0
sp|Q08686|THTR_YEAST	0.24771	0.270464	0.151582	0.564534	0.277581	0
sp|Q08962|NIP7_YEAST	1	0.863586	0.622671	0.979743	0.372137	0
sp|Q12019|MDN1_YEAST	0.999383	0.772719	0.267007	0.578471	0.305015	0
sp|Q12074|SPEE_YEAST	0.662319	0.209086	0.860264	0.767047	0.329845	0
sp|Q12154|GET3_YEAST	0.92695	0.532293	0.595931	0.990931	0.582829	0
sp|Q12159|YRA1_YEAST	0.779232	0.475388	0.602476	1	0.65713	0
sp|Q12178|FCY1_YEAST	0.961035	0.259738	1	0.923707	0.390124	0
sp|Q12189|RPIA_YEAST	0.549528	0.666927	0.438235	0.565176	0.287463	0
sp|Q12211|PUS1_YEAST	0.537576	0.896054	0.224701	0.546559	0.281059	0
sp|Q12230|LSP1_YEAST	1	0.0778161	0.418305	0.697941	0.266072	0
sp|Q12285|MDY2_YEAST	1	0.684588	0.462647	0.846991	0.384532	0
sp|Q12305|RDL1_YEAST	0.83105	0.0362755	0.0741634	0.107	0.060315	0
sp|Q12306|SMT3_YEAST	0.342465	0.17791	0.166169	0.675129	0.282156	0
sp|Q12314|SFM1_YEAST	0.176896	0.0148777	0.86004	0.565058	0.632683	0
sp|Q12363|WTM1_YEAST	0.236817	0.563361	0.694229	0.999408	0.598403	0
sp|Q12377|RPN6_YEAST	0.709083	0.430094	0.23096	0.725782	0.258791	0
sp|Q12460|NOP56_YEAST	0.879907	0.539935	0.866934	0.998261	0.418374	0
sp|Q12680|GLT1_YEAST	0.999989	0.852776	0.205607	0.499532	0.27273	0
sp|Q12746|PGA3_YEAST	1	0.705316	0.561643	0.94436	0.519077	0
sp|Q3E772|LSO2_YEAST	0.96412	0.865297	0.10145	0.58252	0.221117	0
sp|Q6Q547|NOP10_YEAST	0.804907	0.917756	0.388156	0.736017	0.352508	0
sp|Q99257|MEX67_YEAST	0.774766	0.729531	0.476756	0.621211	0.240072	0
sp|Q99258|RIB3_YEAST	0.170984	0.471673	0.32279	0.593728	0.328664	0

## Sheet: CPTAC_C-B
Protein	MSqRob_shared	MSstats_shared	LFQ_shared	PECA_shared	eBayes_EBM_shared	Label
O00762ups|UBE2C_HUMAN_UPS	2.44465e-06	0.00195119	0.00102719	1.09163e-06	1.57657e-05	1
P00441ups|SODC_HUMAN_UPS	3.50999e-11	0.00104227	0.000218481	4.20812e-10	1.25033e-07	1
P00709ups|LALBA_HUMAN_UPS	7.83063e-14	0.000779136	9.47119e-05	2.02744e-07	8.59312e-06	1
P00915ups|CAH1_HUMAN_UPS	0.281041	0.0150196	0.637422	0.00286237	0.000580155	1
P00918ups|CAH2_HUMAN_UPS	1.17752e-13	0.000124346	9.33515e-05	1.37059e-08	2.25531e-07	1
P01031ups|CO5_HUMAN_UPS	3.48039e-09	0.000974513	4.5195e-06	2.15425e-07	3.80158e-06	1
P01127ups|PDGFB_HUMAN_UPS	1.43496e-24	0.00190569	0.00020981	4.30751e-13	7.07789e-07	1
P01344ups|IGF2_HUMAN_UPS	1.00825e-18	0.0019124	1.72584e-05	3.63058e-07	2.99058e-06	1
P01375ups|TNFA_HUMAN_UPS	3.38203e-07	0.00672697	0.0620519	2.40786e-05	1.48026e-05	1
P02144ups|MYG_HUMAN_UPS	3.3876e-12	0.00217968	0.000259381	3.72851e-13	1.75985e-07	1
P02753ups|RETBP_HUMAN_UPS	1.23462e-12	0.00112088	5.99773e-05	6.4095e-09	1.81878e-07	1
P02788ups|TRFL_HUMAN_UPS	1.63346e-06	0.129006	0.00699552	2.21928e-05	5.97347e-05	1
P04040ups|CATA_HUMAN_UPS	1.4409e-13	0.00148143	0.000237148	1.36518e-13	9.5187e-07	1
P05413ups|FABPH_HUMAN_UPS	1.71064e-09	0.0762649	9.35948e-05	1.39901e-09	2.16028e-07	1
P06732ups|KCRM_HUMAN_UPS	6.86345e-26	0.000767342	4.07407e-05	1.16981e-15	3.69554e-08	1
P08263ups|GSTA1_HUMAN_UPS	5.79395e-09	0.00732211	0.000166659	1.95782e-09	1.51509e-06	1
P08758ups|ANXA5_HUMAN_UPS	0.999964	0.00114199	5.78494e-06	1.436e-06	1.41748e-05	1
P09211ups|GSTP1_HUMAN_UPS	1.70154e-05	0.017484	6.69481e-05	0.00037675	0.000482187	1
P10145ups|IL8_HUMAN_UPS	4.11209e-14	0.000996775	2.98906e-05	3.42134e-07	4.82259e-06	1
P10599ups|THIO_HUMAN_UPS	8.90362e-10	0.000434628	2.08657e-05	1.52503e-06	1.74271e-06	1
P10636-8ups|TAU_HUMAN_UPS	4.71255e-62	0.000120469	5.82906e-07	2.19874e-32	1.31186e-08	1
P12081ups|SYHC_HUMAN_UPS	2.2584e-36	4.23376e-05	7.08154e-07	8.03775e-14	1.60023e-07	1
P51965ups|UB2E1_HUMAN_UPS	2.21511e-19	0.0072234	9.39291e-06	1.39852e-08	1.13689e-07	1
P61769ups|B2MG_HUMAN_UPS	0.00144701	0.00027853	3.30399e-06	8.70243e-05	2.23098e-05	1
P62937ups|PPIA_HUMAN_UPS	1.4742e-06	0.0026131	1.72216e-05	2.91881e-06	3.73761e-06	1
P63165ups|SUMO1_HUMAN_UPS	4.88607e-07	0.00279945	0.0012558	4.45697e-08	3.04567e-06	1
Q06830ups|PRDX1_HUMAN_UPS	1.45537e-20	0.000759196	6.52406e-06	9.40763e-10	4.26934e-07	1
sp|O13547|CCW14_YEAST	0.910524	0.0502822	0.880641	0.195895	0.0308689	0
sp|O13563|RPN13_YEAST	0.999852	0.73807	0.708781	0.974976	0.542167	0
sp|O14455|RL36B_YEAST	0.674187	0.334483	0.555329	0.656568	0.275411	0
sp|O14467|MBF1_YEAST	0.874391	0.637141	0.909854	0.999847	0.37837	0
sp|P00359|G3P3_YEAST	0.766065	0.986134	0.473179	0.995231	0.513263	0
sp|P00360|G3P1_YEAST	1	0.433806	0.236961	0.971049	0.231953	0
sp|P00498|HIS1_YEAST	0.340469	0.000476338	0.383492	0.0848952	0.103446	0
sp|P00549|KPYK1_YEAST	0.367716	0.089389	0.551084	0.999926	0.132247	0
sp|P00560|PGK_YEAST	0.333703	0.291126	0.930394	0.999782	0.218564	0
sp|P00812|ARGI_YEAST	1	0.936606	0.565857	0.978429	0.35454	0
sp|P00815|HIS2_YEAST	0.999973	0.378965	0.33601	0.51526	0.17268	0
sp|P00830|ATPB_YEAST	0.967135	0.521608	0.644471	0.961075	0.225054	0
sp|P00890|CISY1_YEAST	0.338975	0.200493	0.22745	0.128429	0.023698	0
sp|P00899|TRPE_YEAST	0.509948	0.848707	0.599027	0.975691	0.272773	0
sp|P00924|ENO1_YEAST	1	0.597672	0.97649	0.999857	0.237668	0
sp|P00925|ENO2_YEAST	0.588167	0.372381	0.231322	0.999998	0.172363	0
sp|P00927|THDH_YEAST	0.310787	0.0903866	0.373955	0.329234	0.11511	0
sp|P00931|TRP_YEAST	0.52971	0.842414	0.900576	0.990578	0.675366	0
sp|P00937|TRPG_YEAST	1	0.209538	0.0526101	0.2292	0.0984604	0
sp|P00942|TPIS_YEAST	0.305008	0.360313	0.504303	0.872194	0.226428	0
sp|P00950|PMG1_YEAST	0.448424	0.134129	0.590565	0.998823	0.0787777	0
sp|P00958|SYMC_YEAST	0.616664	0.110445	0.61856	0.970115	0.110923	0
sp|P01120|RAS2_YEAST	0.999975	0.652973	0.486407	0.999955	0.494215	0
sp|P01123|YPT1_YEAST	1	0.221703	0.249852	0.131537	0.046432	0
sp|P02400|RLA4_YEAST	0.376211	0.172305	0.365316	0.781238	0.179877	0
sp|P02406|RL28_YEAST	1	0.210901	0.4405	0.999279	0.472714	0
sp|P02829|HSP82_YEAST	1	0.502796	0.495924	0.805672	0.34339	0
sp|P02992|EFTU_YEAST	0.319856	0.153651	0.188777	0.587108	0.275149	0
sp|P02994|EF1A_YEAST	0.13033	0.048465	0.251276	0.986116	0.110556	0
sp|P03965|CARB_YEAST	0.859806	0.16896	0.0935969	0.695401	0.0505856	0
sp|P04046|PUR1_YEAST	0.657256	0.785782	0.947304	0.855483	0.698611	0
sp|P04147|PABP_YEAST	0.876061	0.0323074	0.718532	1	0.228789	0
sp|P04456|RL25_YEAST	0.82157	0.456127	0.764079	0.997989	0.702848	0
sp|P04801|SYTC_YEAST	0.511903	0.142272	0.826042	0.998921	0.239848	0
sp|P04802|SYDC_YEAST	0.999998	0.373484	0.760068	0.999996	0.350038	0
sp|P04807|HXKB_YEAST	0.460872	0.0138554	0.0696892	0.610381	0.0261006	0
sp|P04840|VDAC1_YEAST	1	0.919677	0.944481	1	0.393747	0
sp|P05317|RLA0_YEAST	0.960262	0.0973146	0.380358	0.821407	0.150029	0
sp|P05319|RLA2_YEAST	0.907649	0.573299	0.150255	0.786389	0.314491	0
sp|P05453|ERF3_YEAST	0.21386	0.18372	0.098747	0.630153	0.207486	0
sp|P05626|ATPF_YEAST	1	0.354028	0.375537	0.807838	0.423242	0
sp|P05694|METE_YEAST	0.524831	0.844758	0.725294	0.997907	0.273681	0
sp|P05739|RL6B_YEAST	0.959986	0.886942	0.258458	0.914981	0.503718	0
sp|P05740|RL17A_YEAST	0.964543	0.827715	0.426053	0.919031	0.455478	0
sp|P05750|RS3_YEAST	0.798213	0.305901	0.761519	0.999906	0.384632	0
sp|P05755|RS9B_YEAST	1	6.14253e-05	0.624286	0.143447	0.049545	0
sp|P05756|RS13_YEAST	0.664709	0.59943	0.731197	0.99815	0.436574	0
sp|P05759|RS31_YEAST	0.790114	0.662987	0.690811	0.994452	0.44124	0
sp|P06101|CDC37_YEAST	0.828416	0.115573	0.712029	0.0664601	0.0153081	0
sp|P06105|SC160_YEAST	0.930631	0.661906	0.770594	0.999999	0.569475	0
sp|P06168|ILV5_YEAST	0.770417	0.0588586	0.487929	0.500101	0.0639527	0
sp|P06208|LEU1_YEAST	0.569662	0.12653	0.224868	0.318315	0.288482	0
sp|P06634|DED1_YEAST	0.999912	0.574448	0.902872	1	0.452335	0
sp|P06786|TOP2_YEAST	0.742909	0.895091	0.0977539	0.438196	0.227662	0
sp|P07149|FAS1_YEAST	0.945697	0.302633	0.830498	1	0.258234	0
sp|P07170|KAD2_YEAST	0.999964	0.867708	0.866636	0.999728	0.761633	0
sp|P07257|QCR2_YEAST	0.798038	0.555108	0.552853	0.857927	0.2476	0
sp|P07259|PYR1_YEAST	0.0536961	0.00184144	0.424745	0.999581	0.215288	0
sp|P07260|IF4E_YEAST	1	0.930873	0.39108	0.5404	0.277595	0
sp|P07263|SYH_YEAST	0.550142	0.131638	0.501744	0.801571	0.102208	0
sp|P07278|KAPR_YEAST	0.931786	0.554275	0.622712	0.986879	0.3491	0
sp|P07283|PMM_YEAST	0.662319	0.677552	0.474459	0.977393	0.411871	0
sp|P07284|SYSC_YEAST	0.435906	0.0851223	0.425102	0.999912	0.119199	0
sp|P07347|ARD1_YEAST	0.993066	0.320359	0.829477	0.883551	0.39199	0
sp|P07702|LYS2_YEAST	1	0.936283	0.714851	0.934112	0.527151	0
sp|P07703|RPAC1_YEAST	0.840172	0.501489	0.979834	0.998048	0.543625	0
sp|P07806|SYV_YEAST	0.961201	0.986708	0.841791	1	0.301787	0
sp|P07991|OAT_YEAST	0.261541	0.312195	0.113855	0.645135	0.0499099	0
sp|P08417|FUMH_YEAST	0.615963	0.0359544	0.839476	0.985302	0.00841441	0
sp|P09064|IF2B_YEAST	0.387953	0.914973	0.45276	0.474158	0.184567	0
sp|P09440|C1TM_YEAST	0.887724	0.356549	0.17573	0.593581	0.150913	0
sp|P09624|DLDH_YEAST	0.721871	0.797039	0.565712	0.516931	0.254477	0
sp|P09733|TBA1_YEAST	0.197634	0.11573	0.492628	0.508358	0.0704623	0
sp|P09938|RIR2_YEAST	0.84747	0.807279	0.323124	0.984617	0.598577	0
sp|P10080|SSBP1_YEAST	0.76283	0.489992	0.782306	0.999965	0.461373	0
sp|P10081|IF4A_YEAST	0.237541	0.127774	0.00582226	0.979001	0.109869	0
sp|P10591|HSP71_YEAST	0.392759	0.0342917	0.355534	0.293526	0.154696	0
sp|P10614|CP51_YEAST	0.986338	0.647144	0.529042	0.956178	0.50041	0
sp|P10659|METK1_YEAST	1	0.741224	0.69342	0.863081	0.377695	0
sp|P10664|RL4A_YEAST	0.878817	0.593691	0.251204	0.970218	0.516947	0
sp|P11154|PYC1_YEAST	0.13043	0.0909877	0.197972	0.394102	0.205855	0
sp|P11412|G6PD_YEAST	0.175889	0.0376213	0.196705	0.524796	0.331181	0
sp|P11484|SSB1_YEAST	1	0.99561	0.637563	0.93241	0.460863	0
sp|P11745|RNA1_YEAST	0.999922	0.00796629	0.411786	0.837567	0.0943633	0
sp|P12385|ERF1_YEAST	0.668136	0.470752	0.701288	0.995529	0.642458	0
sp|P12612|TCPA_YEAST	0.186165	0.0318409	0.0778633	0.692272	0.0387695	0
sp|P12695|ODP2_YEAST	1	0.604225	0.431068	0.734133	0.286493	0
sp|P12709|G6PI_YEAST	1	0.211374	0.906071	1	0.324556	0
sp|P12945|NAT1_YEAST	0.7946	0.487875	0.517745	0.979587	0.335718	0
sp|P13298|PYRE_YEAST	1	0.827158	0.68577	0.972126	0.326759	0
sp|P14020|DPM1_YEAST	0.616003	0.109662	0.877182	0.572663	0.115443	0
sp|P14120|RL30_YEAST	0.0649717	0.00676992	0.0879264	0.130559	0.0379225	0
sp|P14126|RL3_YEAST	0.95381	0.810715	0.611314	0.992943	0.376608	0
sp|P14540|ALF_YEAST	1	0.103938	0.57313	0.999768	0.0839483	0
sp|P14742|GFA1_YEAST	1	0.87867	0.755514	0.999263	0.427315	0
sp|P14832|CYPH_YEAST	1	0.705102	0.730556	0.999959	0.0971942	0
sp|P14843|AROF_YEAST	0.329761	0.0129258	0.012986	0.0317659	0.0215023	0
sp|P14904|AMPL_YEAST	0.0909238	0.114408	0.915747	0.999962	0.524257	0
sp|P14906|SEC63_YEAST	0.448146	0.320417	0.642953	0.557572	0.329968	0
sp|P14907|NSP1_YEAST	0.789677	0.259051	0.139264	0.352965	0.175763	0
sp|P15108|HSC82_YEAST	0.528186	0.951192	0.624964	0.999984	0.244792	0
sp|P15180|SYKC_YEAST	0.160623	0.000486014	0.351182	0.590872	0.0173245	0
sp|P15303|SEC23_YEAST	0.0953616	0.290241	0.162376	0.243306	0.1351	0
sp|P15454|KGUA_YEAST	0.503677	0.104712	0.607315	0.722725	0.275134	0
sp|P15624|SYFB_YEAST	0.547227	0.364909	0.737772	0.988848	0.279053	0
sp|P15625|SYFA_YEAST	0.603762	0.0820248	0.158689	0.496608	0.150028	0
sp|P15646|FBRL_YEAST	1	0.416463	0.369187	0.839265	0.253502	0
sp|P15705|STI1_YEAST	0.901066	0.96281	0.724419	0.999806	0.396301	0
sp|P15891|ABP1_YEAST	0.392472	0.420967	0.393401	0.814239	0.128188	0
sp|P15992|HSP26_YEAST	0.0724177	0.155966	0.0266178	0.545766	0.313793	0
sp|P16140|VATB_YEAST	1	0.23234	0.924901	0.998649	0.432645	0
sp|P16387|ODPA_YEAST	0.14526	0.23966	0.651973	0.9206	0.791434	0
sp|P16521|EF3A_YEAST	0.853924	0.789164	0.761287	1	0.456263	0
sp|P16550|APA1_YEAST	0.814545	0.310679	0.881396	0.977207	0.0536521	0
sp|P16861|PFKA1_YEAST	0.775668	0.584329	0.723199	1	0.565891	0
sp|P16862|PFKA2_YEAST	0.999975	0.992656	0.73362	1	0.448293	0
sp|P17255|VATA_YEAST	0.913628	0.793191	0.649361	1	0.342755	0
sp|P17423|KHSE_YEAST	1	0.317825	0.145653	0.481174	0.229649	0
sp|P17505|MDHM_YEAST	0.794491	0.417147	0.925442	0.998782	0.261898	0
sp|P17555|CAP_YEAST	1	0.0110941	0.0241007	0.00858451	0.0124662	0
sp|P17695|GLRX2_YEAST	1	0.61796	0.736148	0.960053	0.519023	0
sp|P17709|HXKG_YEAST	0.914971	0.483523	0.895965	0.99582	0.52596	0
sp|P17967|PDI_YEAST	0.963104	0.629715	0.658075	0.804694	0.211496	0
sp|P18562|UPP_YEAST	0.901088	0.776126	0.582344	0.660178	0.21493	0
sp|P18759|SEC18_YEAST	0.919359	0.248102	0.317154	0.791296	0.332452	0
sp|P18899|DDR48_YEAST	0.72561	0.923752	0.80591	0.196889	0.0854822	0
sp|P19097|FAS2_YEAST	0.691454	0.536823	0.791814	1	0.266251	0
sp|P19414|ACON_YEAST	0.452868	0.0710066	0.361241	0.897119	0.16343	0
sp|P19524|MYO2_YEAST	0.873195	0.695953	0.942843	0.362977	0.197197	0
sp|P19881|PNPP_YEAST	0.397932	0.0460945	0.181901	0.101711	0.054313	0
sp|P19882|HSP60_YEAST	0.781208	0.290287	0.719269	0.999991	0.439656	0
sp|P20051|PYRC_YEAST	0.941465	0.746778	0.603494	0.947764	0.461094	0
sp|P20447|DBP3_YEAST	0.597572	0.672987	0.837285	0.416678	0.199143	0
sp|P20676|NUP1_YEAST	1	0.0866461	0.361103	0.560716	0.264396	0
sp|P21147|ACO1_YEAST	0.322979	0.212804	0.95794	0.619571	0.04091	0
sp|P21304|PWP1_YEAST	0.508433	0.742249	0.61312	0.835733	0.2784	0
sp|P21524|RIR1_YEAST	0.813862	0.0646647	0.435942	0.446023	0.242211	0
sp|P21827|RCC1_YEAST	0.999986	0.128858	0.307108	0.215554	0.0687687	0
sp|P21965|MCK1_YEAST	0.339179	0.068372	0.10244	0.132787	0.0813479	0
sp|P22137|CLH_YEAST	0.538226	0.508216	0.831318	0.999949	0.301133	0
sp|P22138|RPA2_YEAST	1	0.18743	0.394436	0.866384	0.269449	0
sp|P22146|GAS1_YEAST	0.978171	0.627623	0.651703	0.766921	0.342276	0
sp|P22203|VATE_YEAST	1	0.0540221	0.773003	0.998361	0.137399	0
sp|P22217|TRX1_YEAST	0.36645	0.168153	0.40745	0.577808	0.180073	0
sp|P22515|UBA1_YEAST	0.851744	0.859211	0.92052	0.989693	0.22993	0
sp|P22768|ASSY_YEAST	0.519942	0.0459119	0.948288	0.457455	0.221054	0
sp|P22803|TRX2_YEAST	0.705303	0.0450942	0.592389	0.495395	0.249287	0
sp|P22943|HSP12_YEAST	0.673336	0.244292	0.291775	0.457751	0.0989803	0
sp|P23254|TKT1_YEAST	0.519832	0.566818	0.790201	0.999225	0.425361	0
sp|P23542|AATC_YEAST	0.3575	0.112342	0.135078	0.629947	0.138888	0
sp|P23585|HXT2_YEAST	0.965874	0.179531	0.318643	0.646389	0.0992379	0
sp|P23641|MPCP_YEAST	0.985855	0.0670556	0.424754	0.458812	0.0490004	0
sp|P24000|RL24B_YEAST	0.864744	0.620907	0.92401	0.99575	0.59536	0
sp|P24280|SEC14_YEAST	0.835949	0.863932	0.843374	0.624331	0.315045	0
sp|P24783|DBP2_YEAST	1	0.416635	0.661082	0.630861	0.154594	0
sp|P25087|ERG6_YEAST	1	0.747055	0.770302	0.982941	0.207224	0
sp|P25293|NAP1_YEAST	0.512369	0.0365709	0.313525	0.473334	0.12388	0
sp|P25294|SIS1_YEAST	0.332721	0.559848	0.256208	0.477132	0.197406	0
sp|P25296|CANB_YEAST	1	0.526542	0.343829	0.52877	0.22951	0
sp|P25342|CDC10_YEAST	1	0.165863	0.338945	0.652511	0.316058	0
sp|P25379|STDH_YEAST	0.355527	0.0750853	0.076084	0.256777	0.0483155	0
sp|P25443|RS2_YEAST	1	0.644944	0.752756	0.999897	0.324238	0
sp|P25567|SRO9_YEAST	0.999999	0.139986	0.144286	0.78898	0.405157	0
sp|P25586|KRR1_YEAST	0.581764	0.421159	0.584497	0.766835	0.545536	0
sp|P25605|ILV6_YEAST	0.573896	0.580458	0.350782	0.537298	0.370939	0
sp|P25694|CDC48_YEAST	0.76517	0.109457	0.820912	0.998773	0.174162	0
sp|P25719|CYPC_YEAST	1	0.668476	0.61908	0.58219	0.359837	0
sp|P26321|RL5_YEAST	0.449627	0.192089	0.849461	0.99952	0.355994	0
sp|P26637|SYLC_YEAST	0.590323	0.0973017	0.687067	1	0.376068	0
sp|P26783|RS5_YEAST	0.920589	0.398619	0.746711	1	0.296668	0
sp|P26785|RL16B_YEAST	0.541595	0.0692666	0.614391	0.964248	0.102664	0
sp|P27476|NSR1_YEAST	0.858279	0.264537	0.520883	0.986203	0.325668	0
sp|P27616|PUR7_YEAST	0.627616	0.105711	0.32996	0.489146	0.00343674	0
sp|P27692|SPT5_YEAST	0.254878	0.187685	0.160764	0.215135	0.110812	0
sp|P28000|RPAC2_YEAST	1	0.687812	0.359052	0.477978	0.233784	0
sp|P28007|GAR1_YEAST	0.575529	0.254334	0.245415	0.412403	0.19741	0
sp|P28319|CWP1_YEAST	0.933166	0.675175	0.849787	0.808724	0.299042	0
sp|P28707|SBA1_YEAST	1	0.714531	0.793379	0.939318	0.397818	0
sp|P28777|AROC_YEAST	0.998134	0.739442	0.856964	0.998682	0.52145	0
sp|P28834|IDH1_YEAST	0.727203	0.215904	0.292541	0.650037	0.0612094	0
sp|P29311|BMH1_YEAST	0.881266	0.843296	0.639048	0.842054	0.252582	0
sp|P29453|RL8B_YEAST	0.807928	0.191214	0.523752	0.845855	0.255529	0
sp|P29509|TRXB1_YEAST	0.851038	0.585077	0.402028	0.96478	0.552267	0
sp|P29547|EF1G1_YEAST	1	0.875225	0.592663	0.958059	0.498267	0
sp|P29952|MPI_YEAST	0.970351	0.779916	0.806098	0.955824	0.559525	0
sp|P30624|LCF1_YEAST	1	0.0448224	0.70541	0.167043	0.0213195	0
sp|P30656|PSB5_YEAST	0.988029	0.650689	0.601402	0.25491	0.105558	0
sp|P31116|DHOM_YEAST	0.198277	0.496527	0.606384	0.642164	0.208883	0
sp|P31373|CYS3_YEAST	0.999373	0.222344	0.732967	0.999305	0.718149	0
sp|P31412|VATC_YEAST	1	0.014299	0.328431	0.86006	0.157289	0
sp|P31787|ACBP_YEAST	0.838007	0.826796	0.894437	0.242416	0.118861	0
sp|P32074|COPG_YEAST	0.994982	0.520693	0.636227	0.955167	0.212143	0
sp|P32264|PROB_YEAST	0.00589922	0.0597442	0.0259565	0.00877336	0.00658445	0
sp|P32324|EF2_YEAST	0.999944	0.269705	0.698833	1	0.480841	0
sp|P32352|ERG2_YEAST	0.307893	0.180187	0.166084	0.489131	0.221636	0
sp|P32368|SAC1_YEAST	0.969232	0.401949	0.353601	0.0859187	0.11483	0
sp|P32377|MVD1_YEAST	1	0.120628	0.310894	0.640014	0.267695	0
sp|P32379|PSA5_YEAST	0.80483	0.976252	0.506557	0.956202	0.539007	0
sp|P32381|ARP2_YEAST	0.473991	0.0645896	0.216692	0.466963	0.063057	0
sp|P32386|YBT1_YEAST	0.937697	0.92998	0.559943	0.99829	0.434572	0
sp|P32454|APE2_YEAST	0.629501	0.0600023	0.176433	0.687273	0.0976515	0
sp|P32457|CDC3_YEAST	0.395213	0.333202	0.833955	0.723219	0.277011	0
sp|P32471|EF1B_YEAST	1	0.416527	0.846465	0.997072	0.178527	0
sp|P32473|ODPB_YEAST	1	0.000435073	0.216609	0.265398	0.0422946	0
sp|P32481|IF2G_YEAST	0.575059	0.255153	0.568045	0.751827	0.251829	0
sp|P32486|KRE6_YEAST	0.999859	0.802257	0.258172	0.564147	0.240085	0
sp|P32495|NHP2_YEAST	0.896405	0.892989	0.143564	0.457192	0.179799	0
sp|P32497|EIF3C_YEAST	0.588059	0.0739655	0.51028	0.960465	0.160945	0
sp|P32499|NUP2_YEAST	0.74672	0.474233	0.674961	0.98348	0.298827	0
sp|P32527|ZUO1_YEAST	1	0.137372	0.669248	0.999585	0.161182	0
sp|P32558|SPT16_YEAST	1	0.562321	0.615183	0.910946	0.396306	0
sp|P32563|VPH1_YEAST	0.60529	0.0402777	0.675851	0.491866	0.113868	0
sp|P32582|CBS_YEAST	0.381006	0.43513	0.909243	1	0.508828	0
sp|P32588|PUB1_YEAST	0.898217	0.679189	0.703156	0.694258	0.303947	0
sp|P32589|HSP7F_YEAST	0.820773	0.020378	0.68352	0.999952	0.064067	0
sp|P32599|FIMB_YEAST	0.548628	0.692508	0.960253	0.987124	0.449795	0
sp|P32602|SEC17_YEAST	1	0.692426	0.938861	0.494217	0.349485	0
sp|P32621|GDA1_YEAST	0.522267	0.364069	0.1682	0.268144	0.110275	0
sp|P32623|CRH2_YEAST	0.567711	0.958166	0.427231	0.525103	0.20619	0
sp|P32628|RAD23_YEAST	1	0.563835	0.608947	0.0944008	0.134913	0
sp|P32861|UGPA1_YEAST	0.803008	0.715654	0.690401	0.722353	0.075047	0
sp|P32895|KPR1_YEAST	1	0.0599713	0.140781	0.144568	0.132995	0
sp|P32905|RSSA1_YEAST	0.513492	0.0438776	0.271045	0.318375	0.156831	0
sp|P32911|SUI1_YEAST	0.616288	0.348922	0.439575	0.204283	0.094787	0
sp|P32939|YPT7_YEAST	0.317721	0.100844	0.331668	0.529687	0.198471	0
sp|P33201|MRT4_YEAST	1	0.786172	0.0924697	0.581311	0.189619	0
sp|P33299|PRS7_YEAST	0.999992	0.828471	0.636507	0.958811	0.587394	0
sp|P33302|PDR5_YEAST	0.112406	0.289057	0.92166	0.998731	0.719025	0
sp|P33330|SERC_YEAST	0.219677	0.0811904	0.227013	0.504566	0.155817	0
sp|P33331|NTF2_YEAST	1	0.33736	0.245268	0.943523	0.312528	0
sp|P33399|LHP1_YEAST	0.569091	0.31249	0.736305	0.962494	0.206645	0
sp|P33442|RS3A1_YEAST	0.916444	0.41789	0.491885	0.94787	0.536637	0
sp|P33767|OSTB_YEAST	1	0.0535277	0.0918485	0.268749	0.177624	0
sp|P33775|PMT1_YEAST	0.93756	0.650325	0.899079	0.946032	0.567508	0
sp|P33892|GCN1_YEAST	0.77983	0.176534	0.378466	0.501269	0.2334	0
sp|P34078|LTV1_YEAST	0.778811	0.300765	0.382489	0.422173	0.200047	0
sp|P34216|EDE1_YEAST	0.0727008	0.342361	0.0340022	0.298236	0.0749997	0
sp|P34227|PRX1_YEAST	0.223592	0.486892	0.791841	0.999192	0.476137	0
sp|P34730|BMH2_YEAST	0.717985	0.386682	0.552476	0.974539	0.455913	0
sp|P35179|SC61G_YEAST	0.718787	0.844926	0.668743	0.970354	0.548474	0
sp|P35197|GCS1_YEAST	0.999984	0.92493	0.30575	0.402505	0.275723	0
sp|P35691|TCTP_YEAST	0.758794	0.832533	0.677049	0.999395	0.177773	0
sp|P35719|MRP8_YEAST	0.951604	0.545935	0.69921	0.959307	0.276556	0
sp|P35732|DEF1_YEAST	0.392552	0.747306	0.194252	0.240647	0.165673	0
sp|P36008|EF1G2_YEAST	0.997741	0.866318	0.859313	0.999975	0.438728	0
sp|P36010|NDK_YEAST	0.564342	0.420371	0.948133	0.998991	0.597822	0
sp|P36015|YKT6_YEAST	0.999987	0.517806	0.785942	0.965615	0.106902	0
sp|P36051|MCD4_YEAST	0.716937	0.950429	0.688943	0.952364	0.33798	0
sp|P36114|YKR18_YEAST	0.416876	0.769994	0.71851	0.926039	0.20195	0
sp|P36160|RPF2_YEAST	0.999316	0.0620724	0.797156	0.896114	0.484027	0
sp|P36421|SYYC_YEAST	0.69962	0.728957	0.734797	0.974181	0.592217	0
sp|P37263|YC16_YEAST	1	0.903898	0.591715	0.998565	0.513761	0
sp|P37291|GLYC_YEAST	0.898504	0.611608	0.839095	0.882086	0.464171	0
sp|P37292|GLYM_YEAST	0.999679	0.486663	0.866167	0.995733	0.427034	0
sp|P37302|APE3_YEAST	0.95511	0.158878	0.75127	0.652194	0.18804	0
sp|P37898|AAP1_YEAST	0.104233	0.202394	0.034953	0.621712	0.0338385	0
sp|P38009|PUR92_YEAST	0.465394	0.0384007	0.701942	0.109128	0.0362127	0
sp|P38011|GBLP_YEAST	1	0.124907	0.532783	0.766725	0.396685	0
sp|P38013|AHP1_YEAST	0.885476	0.952922	0.833018	0.989814	0.699735	0
sp|P38075|PDX3_YEAST	1	0.30095	0.565078	0.405203	0.312794	0
sp|P38088|SYG_YEAST	0.819316	0.289809	0.543248	0.999909	0.300052	0
sp|P38205|NCL1_YEAST	0.857042	0.685479	0.911206	0.993443	0.304734	0
sp|P38219|OLA1_YEAST	0.7065	0.187605	0.548198	0.999564	0.151403	0
sp|P38248|ECM33_YEAST	0.99996	0.864862	0.639549	0.964965	0.26985	0
sp|P38250|IST2_YEAST	0.693011	0.965622	0.553737	0.694538	0.297654	0
sp|P38286|MKAR_YEAST	1	0.205906	0.761502	0.346278	0.0937227	0
sp|P38431|IF5_YEAST	0.832672	0.99449	0.97197	0.974381	0.460547	0
sp|P38523|GRPE_YEAST	0.10716	0.121351	0.176433	0.223292	0.123037	0
sp|P38623|RCK2_YEAST	0.0804037	0.0247979	0.042266	0.28862	0.133552	0
sp|P38624|PSB1_YEAST	1	0.171593	0.780552	0.947696	0.490548	0
sp|P38625|GUAA_YEAST	0.650012	0.359986	0.749213	0.999983	0.727101	0
sp|P38627|URA8_YEAST	0.321796	0.165339	0.684541	0.102863	0.0484959	0
sp|P38689|KPR3_YEAST	0.943817	0.585519	0.117898	0.384715	0.226329	0
sp|P38701|RS20_YEAST	0.531704	0.670572	0.768352	0.998861	0.598352	0
sp|P38707|SYNC_YEAST	0.543156	0.140469	0.384068	0.929033	0.128946	0
sp|P38708|YHI0_YEAST	0.498166	0.220829	0.245499	0.266055	0.0838236	0
sp|P38777|FSH1_YEAST	0.590015	0.913713	0.734219	0.737507	0.364081	0
sp|P38788|SSZ1_YEAST	0.933329	0.975068	0.52269	1	0.382	0
sp|P38791|DHYS_YEAST	0.767282	0.15172	0.409774	0.284129	0.180106	0
sp|P38858|SOL3_YEAST	0.865566	0.876619	0.564926	0.355846	0.217711	0
sp|P38861|NMD3_YEAST	1	0.0757476	0.052914	0.0358253	0.0167319	0
sp|P38879|NACA_YEAST	0.999863	0.127576	0.335085	0.417569	0.238008	0
sp|P38891|BCA1_YEAST	0.236512	0.0007039	0.0318101	0.0478697	0.0674128	0
sp|P38910|CH10_YEAST	1	0.418263	0.379195	0.468954	0.255425	0
sp|P38911|FKBP3_YEAST	0.477282	0.0793451	0.00851426	0.154319	0.0250401	0
sp|P38912|IF1A_YEAST	0.84268	0.627348	0.749052	0.992581	0.495262	0
sp|P38934|BFR1_YEAST	0.48316	0.648672	0.576143	0.979528	0.228306	0
sp|P38968|SEC31_YEAST	0.899344	0.364962	0.777912	0.792626	0.135591	0
sp|P38972|PUR4_YEAST	0.282565	0.316272	0.946849	0.999904	0.446159	0
sp|P38986|ASPG1_YEAST	0.468629	0.897454	0.57343	0.735086	0.327977	0
sp|P39007|STT3_YEAST	1	0.962243	0.705247	0.851428	0.314787	0
sp|P39015|STM1_YEAST	0.999939	0.102847	0.348385	0.923522	0.183116	0
sp|P39076|TCPB_YEAST	1	0.296718	0.757162	0.949033	0.370273	0
sp|P39078|TCPD_YEAST	0.251822	0.538847	0.556444	0.538255	0.33699	0
sp|P39079|TCPZ_YEAST	0.92856	0.773944	0.585731	0.998908	0.363532	0
sp|P39109|YCFI_YEAST	0.542629	0.705843	0.512064	0.788739	0.40034	0
sp|P39517|DHH1_YEAST	0.542381	0.712082	0.794499	0.98913	0.531456	0
sp|P39522|ILV3_YEAST	0.755351	0.0636986	0.524484	0.521303	0.0369395	0
sp|P39676|FHP_YEAST	0.895659	0.0335895	0.436442	0.51695	0.181033	0
sp|P39727|ERV46_YEAST	0.60336	0.516024	0.379306	0.562459	0.277026	0
sp|P39730|IF2P_YEAST	0.83753	0.501238	0.917426	0.998965	0.518121	0
sp|P39929|SNF7_YEAST	0.318386	0.080491	0.174835	0.357834	0.185637	0
sp|P39940|RSP5_YEAST	0.999977	0.0766596	0.0276819	0.0350929	0.0201375	0
sp|P39954|SAHH_YEAST	0.796165	0.145202	0.759207	0.999982	0.408349	0
sp|P39986|ATC6_YEAST	0.999868	0.701077	0.493222	0.997083	0.310291	0
sp|P39990|SNU13_YEAST	0.999996	0.63218	0.850674	0.71556	0.316456	0
sp|P40016|RPN3_YEAST	0.0501644	0.165862	0.0282394	0.170304	0.0101262	0
sp|P40032|TPA1_YEAST	0.854045	0.55095	0.249487	0.516991	0.192864	0
sp|P40037|HMF1_YEAST	0.999964	0.382782	0.0322478	0.569329	0.15845	0
sp|P40047|ALDH5_YEAST	0.478859	0.239098	0.251173	0.515009	0.0609118	0
sp|P40069|IMB4_YEAST	0.699068	0.158621	0.201442	0.887759	0.110491	0
sp|P40075|SCS2_YEAST	0.777734	0.733294	0.666599	0.989778	0.464394	0
sp|P40093|YEY6_YEAST	0.911534	0.0855132	0.79702	0.863889	0.448548	0
sp|P40150|SSB2_YEAST	1	0.362995	0.605061	0.594719	0.277938	0
sp|P40185|MMF1_YEAST	0.773239	0.539667	0.433511	0.982106	0.367433	0
sp|P40202|CCS1_YEAST	1	0.41309	0.115544	0.384329	0.0925471	0
sp|P40217|EIF3I_YEAST	0.727061	0.790369	0.833227	0.999258	0.539167	0
sp|P40302|PSA6_YEAST	0.850425	0.92756	0.360466	0.513346	0.270153	0
sp|P40319|ELO3_YEAST	0.874494	0.929208	0.621251	0.948191	0.480404	0
sp|P40327|PRS4_YEAST	0.984338	0.877903	0.720436	0.127058	0.111507	0
sp|P40495|LYS12_YEAST	0.668316	0.734812	0.524751	0.84663	0.449678	0
sp|P40509|COPE_YEAST	0.99969	0.100971	0.26777	0.41936	0.193672	0
sp|P40531|GVP36_YEAST	0.212256	0.210907	0.273772	0.77307	0.151725	0
sp|P40693|RLP7_YEAST	0.688485	0.803587	0.118668	0.791445	0.413019	0
sp|P40825|SYA_YEAST	0.742782	0.797171	0.648303	1	0.415686	0
sp|P40893|REE1_YEAST	0.940217	0.106433	0.519818	0.553025	0.0687895	0
sp|P40961|PHB1_YEAST	0.604504	0.739517	0.689299	0.297148	0.200367	0
sp|P40991|NOP2_YEAST	0.699747	0.517513	0.519796	0.98623	0.463486	0
sp|P41056|RL33B_YEAST	0.0186814	0.0298452	0.733019	0.130464	0.0622978	0
sp|P41057|RS29A_YEAST	0.914196	0.444993	0.656745	0.935423	0.487021	0
sp|P41338|THIL_YEAST	0.845209	0.463373	0.640609	0.959321	0.280173	0
sp|P41805|RL10_YEAST	0.999674	0.185868	0.801139	0.999995	0.57242	0
sp|P41807|VATH_YEAST	0.966421	0.955853	0.699372	0.333711	0.253707	0
sp|P41811|COPB2_YEAST	0.576467	0.24806	0.44401	0.560105	0.191298	0
sp|P41819|DIM1_YEAST	0.877493	0.117378	0.501907	0.741432	0.438814	0
sp|P41911|GPD2_YEAST	1	0.765393	0.368857	0.983305	0.455915	0
sp|P41920|YRB1_YEAST	1	0.170639	0.459195	0.931594	0.379216	0
sp|P41940|MPG1_YEAST	0.847757	0.0479765	0.713744	0.551008	0.038472	0
sp|P43555|EMP47_YEAST	0.720303	0.208353	0.282093	0.402691	0.185718	0
sp|P43561|FET5_YEAST	0.119508	0.230097	0.0341044	0.226945	0.0949743	0
sp|P43593|UBP6_YEAST	1	0.70357	0.135695	0.242559	0.127803	0
sp|P43616|DUG1_YEAST	1	0.00826991	0.114222	0.466661	0.162652	0
sp|P45978|SCD6_YEAST	1	0.597018	0.898447	0.9989	0.594896	0
sp|P46655|SYEC_YEAST	0.154541	0.800357	0.859567	1	0.579784	0
sp|P46672|ARC1_YEAST	0.839111	0.970055	0.503196	0.988903	0.462529	0
sp|P47018|MTC1_YEAST	0.767018	0.459183	0.794944	0.947138	0.334865	0
sp|P47079|TCPQ_YEAST	0.985151	0.90121	0.462015	0.999982	0.446804	0
sp|P47089|DENR_YEAST	0.220251	0.138455	0.111297	0.22016	0.119788	0
sp|P47117|ARP3_YEAST	1	0.516337	0.34148	0.457203	0.206246	0
sp|P47120|DOHH_YEAST	1	0.148641	0.758737	0.679351	0.410674	0
sp|P47122|GPN1_YEAST	1	0.339897	0.162637	0.469877	0.205195	0
sp|P47143|ADK_YEAST	1	0.520449	0.816242	0.999866	0.539887	0
sp|P47154|STE24_YEAST	0.778132	0.17093	0.303813	0.491427	0.102434	0
sp|P47176|BCA2_YEAST	0.514362	0.052208	0.219451	0.422103	0.00142423	0
sp|P47912|LCF4_YEAST	0.616502	0.282984	0.609168	1	0.305967	0
sp|P48164|RS7B_YEAST	0.411773	0.0919725	0.416839	0.891852	0.248099	0
sp|P48589|RS12_YEAST	0.916212	0.671785	0.688259	0.992452	0.596536	0
sp|P48606|TBCA_YEAST	0.753887	0.913974	0.633822	0.294559	0.244989	0
sp|P48813|GNP1_YEAST	1	0.15105	0.0556708	0.222718	0.114221	0
sp|P48836|VATG_YEAST	0.686515	0.779328	0.693765	0.866101	0.409037	0
sp|P49090|ASNS2_YEAST	1	0.0795957	0.439936	0.579519	0.0659331	0
sp|P49166|RL37A_YEAST	0.778807	0.149163	0.789083	0.998425	0.565963	0
sp|P49167|RL38_YEAST	0.808887	0.225988	0.515039	0.943761	0.524956	0
sp|P49435|APT1_YEAST	0.382743	0.96062	0.499372	0.497634	0.24372	0
sp|P49573|CTR1_YEAST	0.634146	0.22545	0.535967	0.282413	0.133205	0
sp|P49626|RL4B_YEAST	0.753557	0.190679	0.7971	0.964341	0.53348	0
sp|P49723|RIR4_YEAST	0.930527	0.698827	0.897279	1	0.525769	0
sp|P50085|PHB2_YEAST	0.746892	0.574615	0.0139717	0.292573	0.0668728	0
sp|P50094|IMDH4_YEAST	0.855389	0.00577394	0.23202	0.103597	0.0232577	0
sp|P50095|IMDH3_YEAST	0.999982	0.37066	0.654458	0.721904	0.22011	0
sp|P51601|GCH1_YEAST	1	0.0578348	0.471238	0.428934	0.137311	0
sp|P52553|PFD6_YEAST	0.772775	0.446075	0.189414	0.866224	0.443874	0
sp|P53011|SEH1_YEAST	0.837764	0.713792	0.267415	0.632068	0.300077	0
sp|P53090|ARO8_YEAST	0.851004	0.847493	0.8586	0.998986	0.404814	0
sp|P53131|PRP43_YEAST	0.551485	0.800331	0.729808	0.999937	0.340961	0
sp|P53141|MLC1_YEAST	0.771467	0.901063	0.662423	0.956277	0.465853	0
sp|P53163|MNP1_YEAST	0.0989084	0.115073	0.0479754	0.101996	0.052644	0
sp|P53221|RL26B_YEAST	0.517596	0.699121	0.710582	0.751679	0.314103	0
sp|P53235|EIF2A_YEAST	0.326937	0.335401	0.30339	0.642035	0.182546	0
sp|P53261|PESC_YEAST	0.969128	0.196104	0.233645	0.604137	0.230212	0
sp|P53295|RBG2_YEAST	0.884535	0.812615	0.526448	0.880288	0.442037	0
sp|P53299|TIM13_YEAST	0.999714	0.169781	0.622223	0.123374	0.0547933	0
sp|P53303|ZPR1_YEAST	0.999991	0.388145	0.12297	0.616522	0.174751	0
sp|P53312|SUCB_YEAST	0.634132	0.831724	0.234095	0.664514	0.207665	0
sp|P53337|ERV29_YEAST	0.575398	0.133062	0.790135	0.657437	0.311326	0
sp|P53549|PRS10_YEAST	0.580878	0.0955746	0.878718	0.654983	0.159179	0
sp|P53622|COPA_YEAST	0.617743	0.721947	0.704361	0.694842	0.105185	0
sp|P53633|PRA1_YEAST	1	0.413074	0.98788	0.883841	0.408683	0
sp|P53731|ARPC2_YEAST	0.796009	0.956972	0.727814	0.585601	0.267767	0
sp|P53834|HCH1_YEAST	0.999967	0.709458	0.737062	0.98088	0.555971	0
sp|P53981|YNB0_YEAST	1	0.969368	0.283925	0.735613	0.276204	0
sp|P54115|ALDH6_YEAST	0.851678	0.691297	0.657768	0.997683	0.574694	0
sp|P54837|TMEDA_YEAST	1	0.295911	0.103004	0.225875	0.11378	0
sp|P54838|DAK1_YEAST	0.785083	0.0298355	0.367163	0.426642	0.188019	0
sp|P54839|HMCS_YEAST	0.76773	0.96669	0.317978	0.992593	0.216449	0
sp|P54885|PROA_YEAST	0.663355	0.192284	0.206189	0.788254	0.157237	0
sp|P60010|ACT_YEAST	0.975002	0.992976	0.648641	0.999993	0.590178	0
sp|P61830|H3_YEAST	1	0.403214	0.552222	0.985886	0.528151	0
sp|P80210|PURA_YEAST	0.607102	0.722397	0.826461	0.998157	0.227705	0
sp|Q00055|GPD1_YEAST	0.968963	0.7355	0.863022	0.911054	0.37557	0
sp|Q01080|RPA49_YEAST	1	0.0396955	0.485907	0.190408	0.0471828	0
sp|Q01532|BLH1_YEAST	0.453378	0.414654	0.36822	0.340843	0.128592	0
sp|Q01662|MAP1_YEAST	0.668728	0.251317	0.808219	0.810037	0.070022	0
sp|Q01852|TIM44_YEAST	1	0.966566	0.55458	0.91025	0.399077	0
sp|Q01855|RS15_YEAST	1	0.527528	0.786566	0.882249	0.426609	0
sp|Q01939|PRS8_YEAST	0.876884	0.261251	0.360666	0.604397	0.160385	0
sp|Q02486|ABF2_YEAST	0.106098	0.795014	0.372359	0.549543	0.49345	0
sp|Q02753|RL21A_YEAST	0.910693	0.450011	0.729321	0.205443	0.0974685	0
sp|Q02892|NOG1_YEAST	0.851428	0.181195	0.433414	0.334858	0.114093	0
sp|Q03048|COFI_YEAST	1	0.0202631	0.900263	0.270833	0.0933237	0
sp|Q03161|YMY9_YEAST	1	0.73457	0.70126	0.856957	0.258811	0
sp|Q03195|RLI1_YEAST	0.164403	0.0480275	0.357892	0.520384	0.0868732	0
sp|Q03532|HAS1_YEAST	0.9411	0.796138	0.309377	0.999402	0.478911	0
sp|Q03640|TCB3_YEAST	1	0.482247	0.932784	0.994451	0.100552	0
sp|Q03690|CLU_YEAST	0.670016	0.647459	0.860371	0.999636	0.597618	0
sp|Q03835|GLRX3_YEAST	0.774498	0.635054	0.645613	0.429955	0.154341	0
sp|Q03862|ARX1_YEAST	1	0.235186	0.365877	0.781846	0.389831	0
sp|Q04013|YHM2_YEAST	0.769182	0.654035	0.643915	0.988382	0.526952	0
sp|Q04067|EIF3G_YEAST	1	0.832584	0.833987	0.886257	0.294301	0
sp|Q04225|RRB1_YEAST	0.187757	0.455782	0.290465	0.485053	0.180307	0
sp|Q04305|UTP15_YEAST	0.895623	0.149057	0.258143	0.491161	0.201781	0
sp|Q04344|HNT1_YEAST	1	0.237025	0.911285	0.943822	0.520768	0
sp|Q04439|MYO5_YEAST	0.965328	0.518005	0.769943	0.17882	0.0967141	0
sp|Q04491|SEC13_YEAST	0.98453	0.768191	0.458997	0.723285	0.338674	0
sp|Q04493|PFD5_YEAST	1	0.266744	0.52053	0.720363	0.317246	0
sp|Q04636|POB3_YEAST	0.211371	0.231448	0.0955876	0.210766	0.0868425	0
sp|Q04660|ERB1_YEAST	0.241038	0.344242	0.128539	0.224958	0.104415	0
sp|Q04869|YM94_YEAST	0.994675	0.258979	0.196613	0.486022	0.240956	0
sp|Q04894|ADH6_YEAST	1	0.753183	0.438267	0.547683	0.244136	0
sp|Q05016|YM71_YEAST	0.0892875	0.0399652	0.166689	0.765308	0.110046	0
sp|Q05022|RRP5_YEAST	1	0.0122482	0.284429	0.391904	0.10557	0
sp|Q05359|ERP1_YEAST	0.860886	0.331974	0.446401	0.74792	0.341923	0
sp|Q05933|ARPC3_YEAST	0.840603	0.855155	0.605791	0.977787	0.536912	0
sp|Q06103|RPN7_YEAST	1	0.87717	0.388466	0.411459	0.027457	0
sp|Q06205|FKBP4_YEAST	0.990455	0.0331412	0.298279	0.154067	0.041166	0
sp|Q06218|DBP9_YEAST	0.63296	0.950924	0.678471	0.436407	0.224603	0
sp|Q06252|YL179_YEAST	0.894167	0.763423	0.252671	0.99946	0.354672	0
sp|Q06440|CORO_YEAST	0.425922	0.763376	0.352502	0.271442	0.105414	0
sp|Q06489|MTNA_YEAST	0.999986	0.517818	0.292861	0.0314256	0.0462346	0
sp|Q06505|IWS1_YEAST	0.377476	0.34753	0.924514	0.683307	0.606742	0
sp|Q06631|BFR2_YEAST	1	0.603284	0.916983	0.21127	0.173468	0
sp|Q07478|SUB2_YEAST	0.854222	0.472406	0.573767	0.994969	0.0759194	0
sp|Q07541|YD121_YEAST	0.675308	0.379853	0.309395	0.422074	0.167428	0
sp|Q07623|NOP6_YEAST	0.145541	0.0631482	0.216952	0.0157892	0.0117714	0
sp|Q08193|GAS5_YEAST	0.569211	0.0965978	0.182798	0.402466	0.209783	0
sp|Q08208|NOP12_YEAST	0.999991	0.62857	0.699485	0.625656	0.224887	0
sp|Q08220|GSHB_YEAST	0.231304	0.324241	0.381011	0.933566	0.343683	0
sp|Q08235|BRX1_YEAST	0.940415	0.530379	0.0757583	0.340171	0.0386009	0
sp|Q08245|ZEO1_YEAST	0.519412	0.208482	0.520782	0.851566	0.197983	0
sp|Q08641|AB140_YEAST	0.239524	0.525329	0.227225	0.619076	0.171011	0
sp|Q08972|NEW1_YEAST	0.492883	0.72521	0.835666	0.999999	0.338083	0
sp|Q12068|GRE2_YEAST	0.830205	0.664496	0.302194	0.999703	0.365693	0
sp|Q12074|SPEE_YEAST	0.428498	0.024283	0.434494	0.464772	0.077094	0
sp|Q12118|SGT2_YEAST	0.721439	0.408242	0.570105	0.995692	0.229001	0
sp|Q12122|HOSM_YEAST	0.798905	0.104516	0.178268	0.632139	0.203837	0
sp|Q12159|YRA1_YEAST	0.451941	0.776318	0.643488	0.687292	0.252202	0
sp|Q12189|RPIA_YEAST	0.273384	0.0836989	0.34212	0.0901931	0.0366319	0
sp|Q12207|NCE2_YEAST	0.114682	0.0456014	0.0972273	0.331328	0.138407	0
sp|Q12211|PUS1_YEAST	0.67579	0.564828	0.395156	0.881774	0.473947	0
sp|Q12230|LSP1_YEAST	1	0.292095	0.415757	0.998789	0.452992	0
sp|Q12265|KPR5_YEAST	0.536905	0.476455	0.630613	0.921546	0.0424999	0
sp|Q12285|MDY2_YEAST	1	0.192585	0.406424	0.423319	0.22434	0
sp|Q12305|RDL1_YEAST	0.901001	0.00511606	0.0975449	0.0752484	0.0404041	0
sp|Q12306|SMT3_YEAST	0.557062	0.298978	0.339348	0.648842	0.312022	0
sp|Q12314|SFM1_YEAST	0.148192	0.0228464	0.829128	0.920387	0.649783	0
sp|Q12363|WTM1_YEAST	0.0046143	0.111905	0.97287	0.43712	0.681249	0
sp|Q12377|RPN6_YEAST	0.83409	0.810543	0.364038	0.982445	0.436183	0
sp|Q12449|AHA1_YEAST	0.944711	0.822324	0.482577	0.593006	0.300871	0
sp|Q12460|NOP56_YEAST	0.750795	0.0542463	0.780985	0.95499	0.20206	0
sp|Q12522|IF6_YEAST	0.975433	0.479547	0.634459	0.918002	0.452928	0
sp|Q12680|GLT1_YEAST	0.999997	0.762518	0.48751	0.999259	0.549886	0
sp|Q12692|H2AZ_YEAST	0.999999	0.917761	0.509014	0.980759	0.486441	0
sp|Q12746|PGA3_YEAST	1	0.815883	0.556206	0.870496	0.397675	0
sp|Q12754|RRP12_YEAST	0.823776	0.556161	0.577007	0.685848	0.351353	0
sp|Q3E772|LSO2_YEAST	0.790025	0.967757	0.19819	0.862132	0.246319	0
sp|Q99257|MEX67_YEAST	0.313892	0.179385	0.189332	0.187904	0.106698	0
sp|Q99258|RIB3_YEAST	0.168553	0.267496	0.198708	0.588644	0.152507	0

## Sheet: GST_eBayes_EBM
Protein	p-value	q-value (BH)	q-value (BY)
sp|P00329|ADH1_MOUSE	5.51589e-10	1.28975e-07	8.53946e-07
sp|P30115|GSTA3_MOUSE	6.12707e-10	1.28975e-07	8.53946e-07
sp|P24472|GSTA4_MOUSE	1.02059e-08	1.13122e-06	7.48982e-06
sp|Q9D8N0|EF1G_MOUSE	1.31153e-08	1.13122e-06	7.48982e-06
sp|P19157|GSTP1_MOUSE	1.34349e-08	1.13122e-06	7.48982e-06
sp|Q80W21|GSTM7_MOUSE	1.7971e-08	1.26096e-06	8.34888e-06
sp|P10649|GSTM1_MOUSE	3.98604e-08	2.39732e-06	1.58727e-05
sp|P15626|GSTM2_MOUSE	1.59246e-07	8.38031e-06	5.54863e-05
sp|O35660|GSTM6_MOUSE	5.80027e-07	2.71324e-05	0.000179644
sp|Q91X34|BAAT_MOUSE	9.01241e-07	3.79422e-05	0.000251217
sp|O09174|AMACR_MOUSE	1.37437e-06	5.2601e-05	0.000348273
sp|O35945|AL1A7_MOUSE	2.83433e-06	9.88114e-05	0.000654234
sp|Q9DCS2|MTL26_MOUSE	3.05118e-06	9.88114e-05	0.000654234
sp|Q9CPU0|LGUL_MOUSE	3.64047e-06	0.000109474	0.000724831
sp|Q60737|CSK21_MOUSE	1.99019e-05	0.00055858	0.00369837
sp|Q64471|GSTT1_MOUSE	2.36756e-05	0.000622964	0.00412467
sp|Q91YI0|ARLY_MOUSE	2.70726e-05	0.000670446	0.00443905
sp|Q00623|APOA1_MOUSE	3.30618e-05	0.000773279	0.00511991
sp|P24549|AL1A1_MOUSE	6.59912e-05	0.00140391	0.00929533
sp|P12710|FABPL_MOUSE	6.6694e-05	0.00140391	0.00929533
tr|Q8R5I6|Q8R5I6_MOUSE	8.05304e-05	0.00161444	0.0106893
sp|Q921C5|BICD2_MOUSE	0.000112753	0.00215769	0.0142861
sp|Q8BH00|AL8A1_MOUSE	0.000154057	0.00281991	0.0186707
sp|P31786|ACBP_MOUSE	0.000187248	0.00328464	0.0217477
sp|Q80XD1|CHIO_MOUSE	0.000246191	0.00414585	0.0274499
sp|P49429|HPPD_MOUSE	0.000301964	0.00488949	0.0323735
sp|Q9QXS1|PLEC_MOUSE	0.000381918	0.00581095	0.0384745
sp|P48774|GSTM5_MOUSE	0.000386476	0.00581095	0.0384745
sp|P35492|HUTH_MOUSE	0.000413175	0.00599816	0.039714
sp|Q9WVL0|MAAI_MOUSE	0.000461613	0.00643735	0.0426219
sp|Q61176|ARGI1_MOUSE	0.000474009	0.00643735	0.0426219
sp|Q8QZS1|HIBCH_MOUSE	0.000536064	0.0070526	0.0466955
sp|P08226|APOE_MOUSE	0.000678225	0.00865251	0.0572886
tr|K7N747|K7N747_MOUSE	0.000722928	0.00888082	0.0588002
sp|P48758|CBR1_MOUSE	0.00073831	0.00888082	0.0588002
sp|P09103|PDIA1_MOUSE	0.000828255	0.0093176	0.0616921
sp|Q8BMS1|ECHA_MOUSE	0.000842193	0.0093176	0.0616921
sp|Q78PY7|SND1_MOUSE	0.000851912	0.0093176	0.0616921
sp|Q99L20|GSTT3_MOUSE	0.00086315	0.0093176	0.0616921
sp|P70694|DHB5_MOUSE	0.00123357	0.0129834	0.0859633
sp|Q91XD4|FTCD_MOUSE	0.00139052	0.0142783	0.094537
sp|P56480|ATPB_MOUSE	0.00143886	0.0144228	0.0954941
sp|Q60692|PSB6_MOUSE	0.00147791	0.0144698	0.0958051
sp|P07724|ALBU_MOUSE	0.00154673	0.0147994	0.0979872
sp|Q64442|DHSO_MOUSE	0.00164093	0.0153518	0.101645
sp|P40142|TKT_MOUSE	0.00169788	0.0155254	0.102794
sp|P19639|GSTM3_MOUSE	0.00173324	0.0155254	0.102794
sp|Q9DCM2|GSTK1_MOUSE	0.00184492	0.0159477	0.10559
sp|Q8VCX1|AK1D1_MOUSE	0.00185615	0.0159477	0.10559
sp|P11725|OTC_MOUSE	0.00229014	0.019283	0.127673
sp|P17182|ENOA_MOUSE	0.00235701	0.0194569	0.128825
sp|Q8K183|PDXK_MOUSE	0.00259704	0.0210261	0.139214
sp|P07901|HS90A_MOUSE	0.00294954	0.0231249	0.153111
sp|Q9DBA8|HUTI_MOUSE	0.00304753	0.0231249	0.153111
sp|Q9WUM4|COR1C_MOUSE	0.00311039	0.0231249	0.153111
sp|P28271|ACOC_MOUSE	0.0031236	0.0231249	0.153111
sp|Q91YR1|TWF1_MOUSE	0.00313093	0.0231249	0.153111
sp|P11499|HS90B_MOUSE	0.00330861	0.0233475	0.154585
sp|Q9D0S9|HINT2_MOUSE	0.00332627	0.0233475	0.154585
sp|Q61598|GDIB_MOUSE	0.00332744	0.0233475	0.154585
sp|Q8BH95|ECHM_MOUSE	0.00353324	0.0243733	0.161377
sp|Q99KB8|GLO2_MOUSE	0.00362178	0.0243733	0.161377
sp|Q99J08|S14L2_MOUSE	0.00364732	0.0243733	0.161377
sp|P52196|THTR_MOUSE	0.0038197	0.024794	0.164162
sp|Q9JMD3|STA10_MOUSE	0.00388683	0.024794	0.164162
sp|P63017|HSP7C_MOUSE	0.00391339	0.024794	0.164162
sp|P47738|ALDH2_MOUSE	0.00394583	0.024794	0.164162
sp|P50544|ACADV_MOUSE	0.00440761	0.0272883	0.180677
sp|P62259|1433E_MOUSE	0.00474482	0.028804	0.190712
sp|P80313|TCPH_MOUSE	0.00481059	0.028804	0.190712
sp|Q60866|PTER_MOUSE	0.00485768	0.028804	0.190712
sp|A3KMP2|TTC38_MOUSE	0.00505117	0.0295353	0.195554
REV__sp|Q9Z140|CPNE6_MOUSE	0.00535484	0.030882	0.204471
sp|Q68FD5|CLH1_MOUSE	0.00543409	0.0309155	0.204693
sp|P13707|GPDA_MOUSE	0.00556956	0.0312638	0.206999
sp|P46471|PRS7_MOUSE	0.00573048	0.0317439	0.210177
sp|Q8VC12|HUTU_MOUSE	0.00592743	0.0321602	0.212934
sp|Q99LX0|PARK7_MOUSE	0.00595842	0.0321602	0.212934
sp|Q99KR3|LACB2_MOUSE	0.0061423	0.032733	0.216726
sp|Q9DBT9|M2GD_MOUSE	0.00649142	0.0341611	0.226182
sp|P70349|HINT1_MOUSE	0.00666425	0.0342696	0.2269
sp|P34914|HYES_MOUSE	0.00673382	0.0342696	0.2269
sp|Q8K354|CBR3_MOUSE	0.00675625	0.0342696	0.2269
sp|O08709|PRDX6_MOUSE	0.00685867	0.034375	0.227598
sp|P06151|LDHA_MOUSE	0.00698421	0.0345924	0.229037
sp|Q9QXF8|GNMT_MOUSE	0.00718905	0.0351929	0.233013
sp|Q8VC30|TKFC_MOUSE	0.00771917	0.0367763	0.243497
sp|Q91ZJ5|UGPA_MOUSE	0.0077744	0.0367763	0.243497
sp|P14152|MDHC_MOUSE	0.00777455	0.0367763	0.243497
sp|Q9QXD6|F16P1_MOUSE	0.00835503	0.0387946	0.256861
sp|Q71RI9|KAT3_MOUSE	0.00838554	0.0387946	0.256861
sp|Q9R0H0|ACOX1_MOUSE	0.00885956	0.0402065	0.266209
sp|P00920|CAH2_MOUSE	0.00892357	0.0402065	0.266209
sp|Q9WVJ2|PSD13_MOUSE	0.00897723	0.0402065	0.266209
sp|O08749|DLDH_MOUSE	0.0095446	0.0422977	0.280054
sp|P57776|EF1D_MOUSE	0.00989129	0.0433449	0.286988
tr|G3X9Y6|G3X9Y6_MOUSE	0.0100649	0.0433449	0.286988
sp|P26638|SYSC_MOUSE	0.0101595	0.0433449	0.286988
sp|P17751|TPIS_MOUSE	0.010406	0.0433449	0.286988
CON__Streptavidin	0.0104272	0.0433449	0.286988
sp|Q9CQ62|DECR_MOUSE	0.0104719	0.0433449	0.286988
sp|P50247|SAHH_MOUSE	0.0105693	0.0433449	0.286988
sp|Q60759|GCDH_MOUSE	0.0106126	0.0433449	0.286988
sp|Q99JY9|ARP3_MOUSE	0.0107075	0.0433449	0.286988
sp|P99029|PRDX5_MOUSE	0.0110209	0.0438652	0.290433
sp|P32020|NLTP_MOUSE	0.0110444	0.0438652	0.290433
sp|P55264|ADK_MOUSE	0.0112141	0.0439386	0.290919
sp|Q9D0F9|PGM1_MOUSE	0.0113587	0.0439386	0.290919
sp|P16331|PH4H_MOUSE	0.0115443	0.0439386	0.290919
sp|Q8K157|GALM_MOUSE	0.0116709	0.0439386	0.290919
sp|Q9JM62|REEP6_MOUSE	0.0116833	0.0439386	0.290919
sp|P10518|HEM2_MOUSE	0.0117707	0.0439386	0.290919
sp|Q9CXF0|KYNU_MOUSE	0.0117935	0.0439386	0.290919
sp|P28474|ADHX_MOUSE	0.0119081	0.0439763	0.291169
sp|O88844|IDHC_MOUSE	0.0121898	0.044343	0.293597
sp|Q99MZ7|PECR_MOUSE	0.0124216	0.044343	0.293597
sp|Q64105|SPRE_MOUSE	0.0125186	0.044343	0.293597
sp|Q91VA0|ACSM1_MOUSE	0.012572	0.044343	0.293597
sp|P00375|DYR_MOUSE	0.0127246	0.044343	0.293597
REV__sp|Q925D8|TS1R3_MOUSE	0.0127352	0.044343	0.293597
sp|Q9EQF5|DPYS_MOUSE	0.0127447	0.044343	0.293597
sp|P51855|GSHB_MOUSE	0.0131714	0.0454523	0.300941
sp|Q01853|TERA_MOUSE	0.0137465	0.0459301	0.304105
sp|Q9D0R2|SYTC_MOUSE	0.0138001	0.0459301	0.304105
sp|Q9JHI5|IVD_MOUSE	0.0138286	0.0459301	0.304105
sp|Q91V64|ISOC1_MOUSE	0.0138982	0.0459301	0.304105
sp|Q8BP47|SYNC_MOUSE	0.0139276	0.0459301	0.304105
sp|Q8VCN5|CGL_MOUSE	0.0139645	0.0459301	0.304105
sp|P35505|FAAA_MOUSE	0.0143474	0.0468237	0.310021
sp|Q9DBF1|AL7A1_MOUSE	0.0145123	0.0469975	0.311172
sp|P70168|IMB1_MOUSE	0.0150453	0.0483515	0.320137
sp|P60766|CDC42_MOUSE	0.0154732	0.0489763	0.324274
sp|Q91X83|METK1_MOUSE	0.0155793	0.0489763	0.324274
sp|P14824|ANXA6_MOUSE	0.0155886	0.0489763	0.324274
sp|Q8VCR2|DHB13_MOUSE	0.0157525	0.0491244	0.325254
sp|Q8BVI4|DHPR_MOUSE	0.0159639	0.0492468	0.326065
sp|Q3U1J4|DDB1_MOUSE	0.0160257	0.0492468	0.326065
sp|Q91X91|NADC_MOUSE	0.0171944	0.0524553	0.347308
sp|P62192|PRS4_MOUSE	0.0177426	0.0537384	0.355804
sp|Q9CPY7|AMPL_MOUSE	0.0190696	0.0573449	0.379683
tr|Q91WT7|Q91WT7_MOUSE	0.0194099	0.0579544	0.383718
sp|Q9EQH3|VPS35_MOUSE	0.019911	0.0590318	0.390852
sp|Q9QUM9|PSA6_MOUSE	0.0201292	0.0592616	0.392373
sp|P09411|PGK1_MOUSE	0.0205914	0.0602012	0.398595
sp|Q9R1P0|PSA4_MOUSE	0.0207999	0.0603914	0.399854
sp|Q8R0Y6|AL1L1_MOUSE	0.0210637	0.0607384	0.402151
sp|Q9QYB1|CLIC4_MOUSE	0.0212116	0.0607488	0.40222
sp|P06745|G6PI_MOUSE	0.021625	0.0613109	0.405942
sp|Q61425|HCDH_MOUSE	0.0216991	0.0613109	0.405942
sp|Q9ET01|PYGL_MOUSE	0.02189	0.0613742	0.406361
sp|P05201|AATC_MOUSE	0.0220131	0.0613742	0.406361
sp|Q9QXD1|ACOX2_MOUSE	0.0225359	0.0624185	0.413275
sp|O09173|HGD_MOUSE	0.0227519	0.0626049	0.414509
sp|Q8C196|CPSM_MOUSE	0.0234962	0.0641336	0.424631
sp|Q91Y97|ALDOB_MOUSE	0.0236121	0.0641336	0.424631
sp|Q9DCG6|PBLD1_MOUSE	0.0240136	0.064806	0.429083
sp|Q9D2G2|ODO2_MOUSE	0.024349	0.0652925	0.432304
sp|Q99LB7|SARDH_MOUSE	0.0249786	0.0665568	0.440675
sp|Q91Z53|GRHPR_MOUSE	0.025439	0.0669921	0.443557
sp|Q9JII6|AK1A1_MOUSE	0.0254602	0.0669921	0.443557
sp|P50431|GLYC_MOUSE	0.0261734	0.068043	0.450515
sp|Q9EPQ7|STAR5_MOUSE	0.0261828	0.068043	0.450515
sp|O70435|PSA3_MOUSE	0.0264478	0.0683098	0.452282
CON__P02769	0.0271227	0.069626	0.460996
sp|P54869|HMCS2_MOUSE	0.0280172	0.0712451	0.471716
sp|P61089|UBE2N_MOUSE	0.0281046	0.0712451	0.471716
sp|Q93092|TALDO_MOUSE	0.0282611	0.0712451	0.471716
tr|F6RWR5|F6RWR5_MOUSE	0.0292862	0.0733897	0.485916
sp|Q9WTP6|KAD2_MOUSE	0.0302861	0.0749468	0.496225
sp|P42932|TCPQ_MOUSE	0.03031	0.0749468	0.496225
sp|P99026|PSB4_MOUSE	0.0304849	0.0749468	0.496225
sp|Q91XE4|ACY3_MOUSE	0.0306196	0.0749468	0.496225
sp|Q3UQ44|IQGA2_MOUSE	0.0311402	0.0752964	0.49854
sp|P58252|EF2_MOUSE	0.0311949	0.0752964	0.49854
sp|P35700|PRDX1_MOUSE	0.031299	0.0752964	0.49854
sp|Q02053|UBA1_MOUSE	0.0318117	0.0760951	0.503829
sp|P61750|ARF4_MOUSE	0.032483	0.0772618	0.511553
sp|P47754|CAZA2_MOUSE	0.0330076	0.0780687	0.516895
sp|Q99K51|PLST_MOUSE	0.0334489	0.0780893	0.517032
sp|P08113|ENPL_MOUSE	0.0335529	0.0780893	0.517032
sp|Q9D1A2|CNDP2_MOUSE	0.0337104	0.0780893	0.517032
sp|Q9D6Y9|GLGB_MOUSE	0.0339724	0.0780893	0.517032
sp|Q9D826|SOX_MOUSE	0.0340606	0.0780893	0.517032
sp|Q61792|LASP1_MOUSE	0.034163	0.0780893	0.517032
sp|P61982|1433G_MOUSE	0.0343148	0.0780893	0.517032
sp|O08601|MTP_MOUSE	0.0348114	0.0787936	0.521695
sp|Q9Z1Q5|CLIC1_MOUSE	0.0352766	0.0794195	0.525839
sp|Q9Z2I9|SUCB1_MOUSE	0.0355365	0.0795791	0.526896
sp|P10126|EF1A1_MOUSE	0.0357353	0.0796009	0.52704
sp|P17742|PPIA_MOUSE	0.0364874	0.0808483	0.5353
sp|Q3UZZ6|ST1D1_MOUSE	0.0370057	0.0815675	0.540062
sp|P06801|MAOX_MOUSE	0.037336	0.0818669	0.542044
sp|P26443|DHE3_MOUSE	0.0380429	0.0826071	0.546944
sp|Q99L47|F10A1_MOUSE	0.0382555	0.0826071	0.546944
sp|Q61316|HSP74_MOUSE	0.0382622	0.0826071	0.546944
sp|Q9DB29|IAH1_MOUSE	0.0387481	0.0827496	0.547888
sp|P16332|MUTA_MOUSE	0.0388315	0.0827496	0.547888
sp|Q9DBB8|DHDH_MOUSE	0.0389178	0.0827496	0.547888
tr|Q9JLI0|Q9JLI0_MOUSE	0.0391415	0.0828069	0.548267
sp|Q07076|ANXA7_MOUSE	0.0397317	0.0831897	0.550802
sp|Q61171|PRDX2_MOUSE	0.0398637	0.0831897	0.550802
sp|Q922D8|C1TC_MOUSE	0.0399153	0.0831897	0.550802
sp|Q8VCR7|ABHEB_MOUSE	0.0409219	0.0848675	0.561911
tr|A8DUK4|A8DUK4_MOUSE	0.0413416	0.0853177	0.564891
sp|Q9D6Y7|MSRA_MOUSE	0.0417648	0.0857706	0.56789
sp|P47791|GSHR_MOUSE	0.0420675	0.0859729	0.56923
sp|Q9JLJ2|AL9A1_MOUSE	0.0423988	0.0862314	0.570941
sp|Q9QZ85|IIGP1_MOUSE	0.0426778	0.0863816	0.571936
sp|Q3UEG6|AGT2_MOUSE	0.0438482	0.0879472	0.582302
sp|Q61133|GSTT2_MOUSE	0.0438692	0.0879472	0.582302
sp|O35490|BHMT1_MOUSE	0.0441773	0.0881453	0.583613
sp|P42125|ECI1_MOUSE	0.0445698	0.0882011	0.583983
sp|Q91WU0|CES1F_MOUSE	0.044818	0.0882011	0.583983
sp|Q8VCT3|AMPB_MOUSE	0.0448338	0.0882011	0.583983
sp|Q78JT3|3HAO_MOUSE	0.0453336	0.088604	0.58665
sp|Q80W22|THNS2_MOUSE	0.0456246	0.088604	0.58665
sp|Q8BWT1|THIM_MOUSE	0.04567	0.088604	0.58665
sp|Q9JI75|NQO2_MOUSE	0.0459575	0.0886898	0.587219
sp|P61922|GABT_MOUSE	0.0461356	0.0886898	0.587219
sp|P05202|AATM_MOUSE	0.0465845	0.0889168	0.588721
sp|Q60936|COQ8A_MOUSE	0.046676	0.0889168	0.588721
sp|Q91ZA3|PCCA_MOUSE	0.0476596	0.0903815	0.598419
sp|Q9QYG0|NDRG2_MOUSE	0.048683	0.0916668	0.606929
sp|Q8QZR3|EST2A_MOUSE	0.0487728	0.0916668	0.606929
sp|Q9EQ20|MMSA_MOUSE	0.0490814	0.0918367	0.608054
sp|Q9QUR6|PPCE_MOUSE	0.0494786	0.0921703	0.610263
sp|P07309|TTHY_MOUSE	0.0507786	0.0941754	0.623538
sp|P25688|URIC_MOUSE	0.0527965	0.0974884	0.645474
sp|Q9CZN7|GLYM_MOUSE	0.0539254	0.0988571	0.654536
sp|P24270|CATA_MOUSE	0.0540074	0.0988571	0.654536
sp|P68510|1433F_MOUSE	0.0552711	0.10017	0.663232
sp|Q8BG32|PSD11_MOUSE	0.0553993	0.10017	0.663232
sp|Q8CHR6|DPYD_MOUSE	0.0554387	0.10017	0.663232
sp|P48036|ANXA5_MOUSE	0.0567425	0.102088	0.675928
sp|P52760|RIDA_MOUSE	0.0571511	0.102386	0.677898
sp|Q8BWP5|TTPA_MOUSE	0.0579855	0.10344	0.684881
sp|P42225|STAT1_MOUSE	0.0594219	0.105155	0.696237
sp|P16015|CAH3_MOUSE	0.0594464	0.105155	0.696237
sp|P59999|ARPC4_MOUSE	0.0614645	0.10827	0.716861
sp|P22599|A1AT2_MOUSE	0.0640781	0.111987	0.741467
sp|O35215|DOPD_MOUSE	0.0641063	0.111987	0.741467
sp|Q91WT9|CBS_MOUSE	0.0663286	0.114561	0.758513
sp|P51660|DHB4_MOUSE	0.0663632	0.114561	0.758513
sp|Q8R1G2|CMBL_MOUSE	0.0663964	0.114561	0.758513
sp|Q571F8|GLSL_MOUSE	0.0680375	0.116914	0.774088
sp|P41216|ACSL1_MOUSE	0.0688575	0.117841	0.780233
CON__P01966	0.06945	0.118374	0.783761
sp|P60710|ACTB_MOUSE	0.0719211	0.12207	0.808231
sp|Q9DCD0|6PGD_MOUSE	0.0721983	0.12207	0.808231
sp|Q99PT1|GDIR1_MOUSE	0.0725772	0.12222	0.809223
sp|P10639|THIO_MOUSE	0.0732864	0.122923	0.813875
sp|O08807|PRDX4_MOUSE	0.0738099	0.123309	0.816436
sp|P47757|CAPZB_MOUSE	0.0741476	0.123384	0.81693
sp|P38647|GRP75_MOUSE	0.0746092	0.123663	0.818779
sp|P18760|COF1_MOUSE	0.076293	0.125926	0.833764
sp|Q64516|GLPK_MOUSE	0.0765729	0.125926	0.833764
sp|P51174|ACADL_MOUSE	0.0788927	0.129131	0.85498
sp|Q9Z1Q9|SYVC_MOUSE	0.0793353	0.129131	0.85498
sp|Q8BWU8|AT2L1_MOUSE	0.0794415	0.129131	0.85498
sp|Q91WK2|EIF3H_MOUSE	0.0804598	0.130283	0.862609
sp|Q8CGK3|LONM_MOUSE	0.0817312	0.130326	0.862894
sp|P45952|ACADM_MOUSE	0.0817928	0.130326	0.862894
sp|E9Q557|DESP_MOUSE	0.0819298	0.130326	0.862894
sp|P63028|TCTP_MOUSE	0.0820023	0.130326	0.862894
sp|P01942|HBA_MOUSE	0.0821193	0.130326	0.862894
sp|P63101|1433Z_MOUSE	0.0825626	0.130326	0.862894
sp|O55060|TPMT_MOUSE	0.0826534	0.130326	0.862894
sp|Q91YP0|L2HDH_MOUSE	0.0841313	0.131822	0.872798
sp|P08228|SODC_MOUSE	0.0842283	0.131822	0.872798
sp|P34884|MIF_MOUSE	0.0851591	0.13233	0.876162
sp|Q9DBP5|KCY_MOUSE	0.0851963	0.13233	0.876162
sp|Q9CWJ9|PUR9_MOUSE	0.0854959	0.13233	0.876162
sp|Q9CRB3|HIUH_MOUSE	0.0868349	0.13391	0.886624
CON__P07477	0.0925631	0.142223	0.941663
REV__sp|Q9JIC3|DCR1A_MOUSE	0.0930518	0.142454	0.943192
sp|P84084|ARF5_MOUSE	0.0939026	0.143235	0.948367
sp|O55125|NIPS1_MOUSE	0.0968604	0.147214	0.974708
sp|P27773|PDIA3_MOUSE	0.0986474	0.14939	0.989119
sp|Q91X52|DCXR_MOUSE	0.0991521	0.149617	0.990617
sp|Q8CHT0|AL4A1_MOUSE	0.0997735	0.14965	0.990836
sp|O70456|1433S_MOUSE	0.099885	0.14965	0.990836
sp|Q8BFZ3|ACTBL_MOUSE	0.100543	0.150101	0.993826
sp|Q9CZL5|PHS2_MOUSE	0.101118	0.150426	0.995974
sp|Q61233|PLSL_MOUSE	0.101773	0.150693	0.997745
sp|Q9CQV8|1433B_MOUSE	0.102013	0.150693	0.997745
sp|Q9Z2V4|PCKGC_MOUSE	0.103357	0.151649	1
sp|P80314|TCPB_MOUSE	0.10338	0.151649	1
sp|A2ADY9|DDI2_MOUSE	0.105824	0.154694	1
tr|Q792Z1|Q792Z1_MOUSE	0.106579	0.155259	1
sp|Q924Y0|BODG_MOUSE	0.107881	0.156614	1
sp|P27005|S10A8_MOUSE	0.109235	0.157558	1
sp|Q8CG76|ARK72_MOUSE	0.109283	0.157558	1
sp|Q61081|CDC37_MOUSE	0.109654	0.157558	1
sp|Q8R0F9|S14L4_MOUSE	0.112443	0.16096	1
sp|Q9QXE0|HACL1_MOUSE	0.112787	0.16096	1
sp|P19096|FAS_MOUSE	0.114805	0.163288	1
sp|Q9Z2I8|SUCB2_MOUSE	0.117357	0.166355	1
sp|Q91V92|ACLY_MOUSE	0.118346	0.167194	1
sp|O70251|EF1B_MOUSE	0.119004	0.167561	1
sp|Q921H8|THIKA_MOUSE	0.122408	0.171779	1
sp|P63037|DNJA1_MOUSE	0.125476	0.175499	1
sp|P53657|KPYR_MOUSE	0.126412	0.176224	1
sp|P45377|ALD2_MOUSE	0.129694	0.179589	1
sp|P16460|ASSY_MOUSE	0.129861	0.179589	1
sp|P09671|SODM_MOUSE	0.130106	0.179589	1
sp|Q9DC50|OCTC_MOUSE	0.13177	0.181035	1
sp|P17563|SBP1_MOUSE	0.132014	0.181035	1
sp|Q05920|PYC_MOUSE	0.132631	0.181291	1
sp|P57780|ACTN4_MOUSE	0.133713	0.182178	1
sp|Q99K67|AASS_MOUSE	0.135287	0.183728	1
sp|Q99KI0|ACON_MOUSE	0.136121	0.184267	1
sp|P52825|CPT2_MOUSE	0.137616	0.185693	1
sp|Q9JMH6|TRXR1_MOUSE	0.140385	0.18828	1
sp|P54071|IDHP_MOUSE	0.14065	0.18828	1
tr|Q8BGL3|Q8BGL3_MOUSE	0.140874	0.18828	1
sp|P07356|ANXA2_MOUSE	0.142729	0.190155	1
sp|Q63880|EST3A_MOUSE	0.143451	0.190514	1
sp|Q64374|RGN_MOUSE	0.145793	0.192413	1
sp|P70266|F261_MOUSE	0.145841	0.192413	1
CON__Q5D862	0.146252	0.192413	1
sp|P62774|MTPN_MOUSE	0.147708	0.193723	1
sp|Q91V76|CK054_MOUSE	0.149637	0.195644	1
sp|Q9DBM2|ECHP_MOUSE	0.153245	0.199741	1
sp|Q9DBE0|CSAD_MOUSE	0.155798	0.202441	1
sp|G3X982|AOXC_MOUSE	0.157554	0.204094	1
sp|P68254|1433T_MOUSE	0.159043	0.20539	1
sp|Q5SW19|CLU_MOUSE	0.161362	0.207747	1
sp|Q62426|CYTB_MOUSE	0.162107	0.207957	1
sp|Q922R8|PDIA6_MOUSE	0.162513	0.207957	1
sp|Q9CZS1|AL1B1_MOUSE	0.163292	0.208321	1
sp|Q03145|EPHA2_MOUSE	0.165293	0.210237	1
sp|Q9DBC0|SELO_MOUSE	0.166705	0.211283	1
sp|Q8QZT1|THIL_MOUSE	0.167119	0.211283	1
sp|P15105|GLNA_MOUSE	0.168033	0.211803	1
sp|P23492|PNPH_MOUSE	0.168988	0.212194	1
sp|O35423|SPYA_MOUSE	0.169352	0.212194	1
sp|Q02257|PLAK_MOUSE	0.172756	0.215817	1
sp|P22315|HEMH_MOUSE	0.175309	0.218359	1
sp|P70296|PEBP1_MOUSE	0.176656	0.218571	1
sp|O55029|COPB2_MOUSE	0.176865	0.218571	1
sp|P97328|KHK_MOUSE	0.177037	0.218571	1
sp|P97807|FUMH_MOUSE	0.179383	0.220819	1
sp|Q9D6R2|IDH3A_MOUSE	0.185079	0.227167	1
CON__P04264	0.186178	0.227851	1
sp|Q61838|PZP_MOUSE	0.188844	0.230444	1
sp|P60335|PCBP1_MOUSE	0.194901	0.236606	1
sp|Q8VBT2|SDHL_MOUSE	0.195017	0.236606	1
sp|P01027|CO3_MOUSE	0.197647	0.239107	1
sp|O55137|ACOT1_MOUSE	0.198744	0.239746	1
sp|O70475|UGDH_MOUSE	0.200806	0.241541	1
sp|P20029|BIP_MOUSE	0.206808	0.248051	1
sp|P63038|CH60_MOUSE	0.208922	0.249347	1
sp|Q5XJY5|COPD_MOUSE	0.209073	0.249347	1
sp|Q9CZU6|CISY_MOUSE	0.212627	0.252869	1
sp|Q60854|SPB6_MOUSE	0.217721	0.258198	1
sp|Q99PL5|RRBP1_MOUSE	0.231816	0.273632	1
sp|Q8VCT4|CES1D_MOUSE	0.232035	0.273632	1
sp|Q8CGC7|SYEP_MOUSE	0.236077	0.27704	1
CON__P20930	0.236662	0.27704	1
sp|P50543|S10AB_MOUSE	0.236899	0.27704	1
sp|P80316|TCPE_MOUSE	0.242086	0.282258	1
sp|Q9Z0S1|BPNT1_MOUSE	0.242702	0.282258	1
sp|Q91VI7|RINI_MOUSE	0.244889	0.283181	1
sp|Q9ET30|TM9S3_MOUSE	0.244976	0.283181	1
sp|Q99JY0|ECHB_MOUSE	0.245513	0.283181	1
sp|Q8BGT5|ALAT2_MOUSE	0.24957	0.287073	1
sp|Q9JM76|ARPC3_MOUSE	0.251136	0.288088	1
sp|Q7TMK9|HNRPQ_MOUSE	0.259307	0.296652	1
sp|P70195|PSB7_MOUSE	0.262505	0.29873	1
sp|O88342|WDR1_MOUSE	0.262542	0.29873	1
REV__sp|Q71LX4|TLN2_MOUSE	0.264341	0.299967	1
sp|P08249|MDHM_MOUSE	0.267531	0.30277	1
sp|Q91X44|GCKR_MOUSE	0.276006	0.311524	1
sp|Q9QYR9|ACOT2_MOUSE	0.278244	0.313211	1
CON__P13645	0.280527	0.314938	1
CON__Q6KB66-1	0.282297	0.316083	1
sp|P99024|TBB5_MOUSE	0.293024	0.327223	1
CON__P13647	0.299941	0.334062	1
sp|Q9WUU7|CATZ_MOUSE	0.306712	0.340701	1
sp|A2AJL3|FGGY_MOUSE	0.312891	0.34665	1
sp|O55135|IF6_MOUSE	0.315499	0.348622	1
sp|Q8BMA6|SRP68_MOUSE	0.316637	0.348964	1
sp|Q07417|ACADS_MOUSE	0.319444	0.350698	1
sp|P63158|HMGB1_MOUSE	0.319876	0.350698	1
sp|P30416|FKBP4_MOUSE	0.321925	0.352027	1
sp|Q9CQN1|TRAP1_MOUSE	0.328876	0.358631	1
sp|P40936|INMT_MOUSE	0.329667	0.358631	1
sp|O88533|DDC_MOUSE	0.331479	0.359672	1
sp|P07759|SPA3K_MOUSE	0.33763	0.365404	1
sp|P80317|TCPZ_MOUSE	0.34076	0.367846	1
sp|Q8CDN6|TXNL1_MOUSE	0.349302	0.376102	1
sp|P68368|TBA4A_MOUSE	0.353227	0.379358	1
sp|P21981|TGM2_MOUSE	0.360216	0.38588	1
sp|Q923D2|BLVRB_MOUSE	0.366409	0.391518	1
sp|Q9JHW2|NIT2_MOUSE	0.370594	0.394987	1
CON__Q86YZ3	0.373358	0.396929	1
sp|Q60864|STIP1_MOUSE	0.376463	0.399222	1
sp|P62141|PP1B_MOUSE	0.381916	0.403986	1
sp|P38060|HMGCL_MOUSE	0.389118	0.410573	1
sp|Q8K010|OPLA_MOUSE	0.391068	0.411599	1
sp|P52792|HXK4_MOUSE	0.393847	0.41349	1
sp|P11352|GPX1_MOUSE	0.407805	0.427079	1
CON__P02533	0.42869	0.447837	1
CON__P00761	0.432389	0.450584	1
sp|Q9CQE1|NPS3B_MOUSE	0.435568	0.452775	1
sp|P04117|FABP4_MOUSE	0.437535	0.4537	1
sp|Q8BT60|CPNE3_MOUSE	0.440729	0.455889	1
sp|Q03249|GALT_MOUSE	0.44598	0.460191	1
sp|Q6ZWX6|IF2A_MOUSE	0.45266	0.465941	1
sp|P26883|FKB1A_MOUSE	0.46355	0.475987	1
sp|P11983|TCPA_MOUSE	0.467876	0.47926	1
sp|Q8VCH0|THIKB_MOUSE	0.473731	0.484079	1
sp|Q9JK84|PAR6G_MOUSE	0.478938	0.488215	1
sp|E9Q4Z2|ACACB_MOUSE	0.49329	0.501631	1
sp|Q63836|SBP2_MOUSE	0.494872	0.502026	1
sp|Q9JK38|GNA1_MOUSE	0.497718	0.5037	1
sp|O88569|ROA2_MOUSE	0.547983	0.553239	1
sp|Q9CYR6|AGM1_MOUSE	0.555594	0.559582	1
sp|P60843|IF4A1_MOUSE	0.566024	0.568726	1
sp|Q920E5|FPPS_MOUSE	0.577574	0.578949	1
sp|P26516|PSMD7_MOUSE	0.612896	0.612896	1

## Sheet: GST_eBayes_LFQ
Protein	p-value	q-value (BH)	q-value (BY)
sp|P30115|GSTA3_MOUSE	2.55347e-06	0.000311523	0.00189295
sp|Q80W21|GSTM7_MOUSE	1.41965e-06	0.000311523	0.00189295
sp|Q9D8N0|EF1G_MOUSE	6.33176e-06	0.000514983	0.00312926
sp|P00329|ADH1_MOUSE	4.30483e-05	0.00210076	0.0127651
sp|P24472|GSTA4_MOUSE	4.17084e-05	0.00210076	0.0127651
sp|P10649|GSTM1_MOUSE	7.66516e-05	0.00233787	0.0142059
sp|P19157|GSTP1_MOUSE	5.9986e-05	0.00233787	0.0142059
sp|Q9CPU0|LGUL_MOUSE	7.20046e-05	0.00233787	0.0142059
sp|P15626|GSTM2_MOUSE	0.000106153	0.00287793	0.0174875
sp|O09174|AMACR_MOUSE	0.000131672	0.0032128	0.0195224
sp|O35660|GSTM6_MOUSE	0.000172817	0.00383339	0.0232934
sp|Q91X34|BAAT_MOUSE	0.000253006	0.00514446	0.03126
sp|P24549|AL1A1_MOUSE	0.0005643	0.0105915	0.0643584
sp|P0DP28|CALM3_MOUSE;sp|P0DP27|CALM2_MOUSE;sp|P0DP26|CALM1_MOUSE	0.000900202	0.0156892	0.0953346
sp|P31786|ACBP_MOUSE	0.00126411	0.0205629	0.124949
sp|P12710|FABPL_MOUSE	0.00238863	0.0364266	0.221344
sp|Q64471|GSTT1_MOUSE	0.00253977	0.0364531	0.221505
sp|O35945|AL1A7_MOUSE	0.00352496	0.0430945	0.261861
tr|A0A0A6YW67|A0A0A6YW67_MOUSE;sp|P62984|RL40_MOUSE;sp|P62983|RS27A_MOUSE;sp|P0CG49|UBB_MOUSE;sp|P0CG50|UBC_MOUSE	0.00353233	0.0430945	0.261861
sp|Q8BH00|AL8A1_MOUSE	0.00349853	0.0430945	0.261861
tr|Q14AA6|Q14AA6_MOUSE;sp|P62827|RAN_MOUSE	0.00730453	0.0810139	0.492276
sp|Q99L20|GSTT3_MOUSE	0.0071594	0.0810139	0.492276
sp|P56480|ATPB_MOUSE	0.00972784	0.0988997	0.600957
sp|Q9DBJ1|PGAM1_MOUSE;sp|O70250|PGAM2_MOUSE	0.00940376	0.0988997	0.600957
sp|Q60692|PSB6_MOUSE	0.0140832	0.137452	0.835216
sp|Q00623|APOA1_MOUSE	0.0179302	0.168268	1
sp|P48758|CBR1_MOUSE	0.0197061	0.178084	1
sp|P62259|1433E_MOUSE	0.0206925	0.18032	1
sp|Q9WVL0|MAAI_MOUSE	0.0215443	0.181269	1
sp|Q9DCM2|GSTK1_MOUSE	0.0229432	0.186605	1
sp|P19639|GSTM3_MOUSE	0.0298399	0.234869	1
sp|P49429|HPPD_MOUSE	0.0315407	0.240498	1
tr|Q9JLI0|Q9JLI0_MOUSE	0.0357447	0.264294	1
sp|O08709|PRDX6_MOUSE	0.0443657	0.318389	1
sp|Q9QXF8|GNMT_MOUSE	0.056095	0.391063	1
sp|P99029|PRDX5_MOUSE	0.0627445	0.425268	1
sp|Q60866|PTER_MOUSE	0.067221	0.443295	1
sp|Q64442|DHSO_MOUSE	0.0715934	0.459705	1
sp|P09103|PDIA1_MOUSE	0.0828145	0.518121	1
sp|Q91YI0|ARLY_MOUSE	0.0861384	0.525444	1
sp|Q8QZS1|HIBCH_MOUSE	0.0883904	0.526031	1
sp|P07724|ALBU_MOUSE	0.101555	0.576596	1
sp|Q64105|SPRE_MOUSE	0.101613	0.576596	1
sp|Q9CXF0|KYNU_MOUSE	0.105663	0.585951	1
sp|Q99KB8|GLO2_MOUSE	0.109513	0.593805	1
sp|Q61176|ARGI1_MOUSE	0.128589	0.682079	1
sp|P28271|ACOC_MOUSE	0.137743	0.715092	1
sp|Q99KR3|LACB2_MOUSE	0.14319	0.727882	1
sp|Q9R0H0|ACOX1_MOUSE	0.155787	0.775753	1
sp|P13745|GSTA1_MOUSE	0.16087	0.783438	1
sp|Q8VC12|HUTU_MOUSE	0.163751	0.783438	1
sp|Q9EQF5|DPYS_MOUSE	0.179722	0.843309	1
sp|P06151|LDHA_MOUSE	0.193344	0.890114	1
sp|P47738|ALDH2_MOUSE	0.217778	0.932243	1
sp|P48036|ANXA5_MOUSE	0.212678	0.932243	1
sp|P70694|DHB5_MOUSE	0.216364	0.932243	1
sp|Q9QXD6|F16P1_MOUSE	0.208654	0.932243	1
sp|P32020|NLTP_MOUSE	0.236908	0.996649	1
sp|E9Q4Z2|ACACB_MOUSE	0.800013	0.999871	1
sp|E9Q557|DESP_MOUSE	0.258696	0.999871	1
sp|G3X982|AOXC_MOUSE	0.639448	0.999871	1
sp|O08529|CAN2_MOUSE	0.99321	0.999871	1
sp|O08749|DLDH_MOUSE	0.485969	0.999871	1
sp|O09173|HGD_MOUSE	0.839945	0.999871	1
sp|O35215|DOPD_MOUSE	0.790665	0.999871	1
sp|O35490|BHMT1_MOUSE	0.623127	0.999871	1
sp|O70475|UGDH_MOUSE	0.548932	0.999871	1
sp|O88844|IDHC_MOUSE	0.490913	0.999871	1
sp|P01942|HBA_MOUSE	0.382865	0.999871	1
sp|P05201|AATC_MOUSE	0.447941	0.999871	1
sp|P05202|AATM_MOUSE	0.645952	0.999871	1
sp|P68373|TBA1C_MOUSE;sp|P68369|TBA1A_MOUSE;sp|P05213|TBA1B_MOUSE;sp|P05214|TBA3_MOUSE	0.718987	0.999871	1
sp|P06801|MAOX_MOUSE	0.278429	0.999871	1
sp|P07901|HS90A_MOUSE	0.256182	0.999871	1
sp|P08113|ENPL_MOUSE	0.632588	0.999871	1
sp|P08249|MDHM_MOUSE	0.604007	0.999871	1
sp|P09411|PGK1_MOUSE	0.647164	0.999871	1
sp|P10126|EF1A1_MOUSE;sp|P62631|EF1A2_MOUSE	0.767721	0.999871	1
sp|P10518|HEM2_MOUSE	0.981492	0.999871	1
sp|P10639|THIO_MOUSE	0.40964	0.999871	1
sp|P11352|GPX1_MOUSE	0.986546	0.999871	1
sp|P11499|HS90B_MOUSE	0.347144	0.999871	1
sp|P11725|OTC_MOUSE	0.344789	0.999871	1
sp|P11983|TCPA_MOUSE	0.990065	0.999871	1
sp|P13707|GPDA_MOUSE	0.441221	0.999871	1
sp|P14152|MDHC_MOUSE	0.30923	0.999871	1
sp|P15532|NDKA_MOUSE;sp|Q01768|NDKB_MOUSE;tr|E9PZF0|E9PZF0_MOUSE	0.454389	0.999871	1
sp|P16015|CAH3_MOUSE	0.315619	0.999871	1
sp|P16331|PH4H_MOUSE	0.538491	0.999871	1
sp|P16460|ASSY_MOUSE	0.698699	0.999871	1
sp|P16858|G3P_MOUSE;tr|A0A1D5RLD8|A0A1D5RLD8_MOUSE;tr|S4R1W1|S4R1W1_MOUSE	0.946313	0.999871	1
sp|P17182|ENOA_MOUSE	0.4287	0.999871	1
sp|P17742|PPIA_MOUSE	0.591901	0.999871	1
sp|P17751|TPIS_MOUSE	0.76082	0.999871	1
sp|P18760|COF1_MOUSE	0.758985	0.999871	1
sp|P19096|FAS_MOUSE	0.60915	0.999871	1
sp|P20029|BIP_MOUSE	0.650608	0.999871	1
sp|P21981|TGM2_MOUSE	0.904898	0.999871	1
sp|P24270|CATA_MOUSE	0.657267	0.999871	1
sp|P25688|URIC_MOUSE	0.705661	0.999871	1
sp|P26041|MOES_MOUSE;sp|P26043|RADI_MOUSE;sp|P26040|EZRI_MOUSE	0.518455	0.999871	1
sp|P26443|DHE3_MOUSE	0.515279	0.999871	1
sp|P28474|ADHX_MOUSE	0.899631	0.999871	1
sp|P34914|HYES_MOUSE	0.400358	0.999871	1
sp|P35505|FAAA_MOUSE	0.63718	0.999871	1
sp|P35700|PRDX1_MOUSE	0.498123	0.999871	1
sp|P38647|GRP75_MOUSE	0.49587	0.999871	1
sp|P40142|TKT_MOUSE	0.26757	0.999871	1
sp|P40936|INMT_MOUSE	0.697872	0.999871	1
sp|P42125|ECI1_MOUSE	0.292964	0.999871	1
sp|P45952|ACADM_MOUSE	0.74185	0.999871	1
sp|P47199|QOR_MOUSE	0.984299	0.999871	1
sp|P50247|SAHH_MOUSE	0.615061	0.999871	1
sp|P50431|GLYC_MOUSE	0.518843	0.999871	1
sp|P50544|ACADV_MOUSE	0.830997	0.999871	1
sp|P51174|ACADL_MOUSE	0.492649	0.999871	1
sp|P52196|THTR_MOUSE	0.265651	0.999871	1
sp|P52760|RIDA_MOUSE	0.662286	0.999871	1
sp|P53657|KPYR_MOUSE	0.518358	0.999871	1
sp|P54869|HMCS2_MOUSE	0.647168	0.999871	1
sp|P55264|ADK_MOUSE	0.423985	0.999871	1
sp|P58252|EF2_MOUSE	0.560042	0.999871	1
sp|P60710|ACTB_MOUSE;sp|P63260|ACTG_MOUSE	0.790919	0.999871	1
sp|P60843|IF4A1_MOUSE	0.761499	0.999871	1
sp|P61458|PHS_MOUSE	0.934111	0.999871	1
sp|P61982|1433G_MOUSE	0.592284	0.999871	1
sp|P63017|HSP7C_MOUSE	0.252609	0.999871	1
sp|P63038|CH60_MOUSE	0.798911	0.999871	1
sp|P63101|1433Z_MOUSE	0.429552	0.999871	1
sp|P63242|IF5A1_MOUSE	0.936716	0.999871	1
sp|P68368|TBA4A_MOUSE	0.899522	0.999871	1
sp|P68372|TBB4B_MOUSE	0.788986	0.999871	1
sp|P70296|PEBP1_MOUSE	0.918432	0.999871	1
sp|P80317|TCPZ_MOUSE	0.842804	0.999871	1
sp|P97328|KHK_MOUSE	0.949461	0.999871	1
sp|P97364|SPS2_MOUSE	0.890158	0.999871	1
sp|P97807|FUMH_MOUSE	0.560382	0.999871	1
sp|Q01853|TERA_MOUSE	0.658979	0.999871	1
sp|Q02053|UBA1_MOUSE	0.703931	0.999871	1
sp|Q03265|ATPA_MOUSE	0.908184	0.999871	1
sp|Q05920|PYC_MOUSE	0.98583	0.999871	1
sp|Q07417|ACADS_MOUSE	0.903366	0.999871	1
sp|Q3TNA1|XYLB_MOUSE	0.644811	0.999871	1
sp|Q5SWU9|ACACA_MOUSE	0.986976	0.999871	1
sp|Q61171|PRDX2_MOUSE	0.812899	0.999871	1
sp|Q61425|HCDH_MOUSE	0.829847	0.999871	1
sp|Q61598|GDIB_MOUSE	0.3527	0.999871	1
sp|Q63836|SBP2_MOUSE	0.569278	0.999871	1
sp|Q64374|RGN_MOUSE	0.802486	0.999871	1
sp|Q68FD5|CLH1_MOUSE	0.926809	0.999871	1
sp|Q71RI9|KAT3_MOUSE	0.416616	0.999871	1
sp|Q78JT3|3HAO_MOUSE	0.429809	0.999871	1
sp|Q8BGQ7|SYAC_MOUSE	0.989644	0.999871	1
sp|Q8BT60|CPNE3_MOUSE	0.982333	0.999871	1
sp|Q8BVI4|DHPR_MOUSE	0.3586	0.999871	1
sp|Q8BWT1|THIM_MOUSE	0.762112	0.999871	1
sp|Q8C196|CPSM_MOUSE	0.6322	0.999871	1
sp|Q8CG76|ARK72_MOUSE	0.905504	0.999871	1
sp|Q8CHT0|AL4A1_MOUSE	0.832006	0.999871	1
sp|Q8QZR5|ALAT1_MOUSE	0.589257	0.999871	1
sp|Q8QZT1|THIL_MOUSE	0.621309	0.999871	1
sp|Q8R0Y6|AL1L1_MOUSE	0.662672	0.999871	1
sp|Q8VBT2|SDHL_MOUSE	0.665347	0.999871	1
sp|Q8VC30|TKFC_MOUSE	0.530809	0.999871	1
sp|Q8VCH0|THIKB_MOUSE	0.547674	0.999871	1
sp|Q8VCN5|CGL_MOUSE	0.333862	0.999871	1
sp|Q8VCR7|ABHEB_MOUSE	0.336846	0.999871	1
sp|Q91V92|ACLY_MOUSE	0.602573	0.999871	1
sp|Q91VA0|ACSM1_MOUSE	0.7001	0.999871	1
sp|Q91WT9|CBS_MOUSE	0.720772	0.999871	1
sp|Q91X83|METK1_MOUSE	0.672995	0.999871	1
sp|Q91X91|NADC_MOUSE	0.686565	0.999871	1
sp|Q91XD4|FTCD_MOUSE	0.329408	0.999871	1
sp|Q91Y97|ALDOB_MOUSE	0.83624	0.999871	1
sp|Q91Z53|GRHPR_MOUSE	0.685183	0.999871	1
sp|Q91ZA3|PCCA_MOUSE	0.984926	0.999871	1
sp|Q91ZJ5|UGPA_MOUSE	0.557602	0.999871	1
sp|Q922D8|C1TC_MOUSE	0.840242	0.999871	1
sp|Q923D2|BLVRB_MOUSE	0.958809	0.999871	1
sp|Q99J08|S14L2_MOUSE	0.413746	0.999871	1
sp|Q99KI0|ACON_MOUSE	0.734082	0.999871	1
sp|Q99LB7|SARDH_MOUSE	0.53927	0.999871	1
sp|Q99LC5|ETFA_MOUSE	0.955352	0.999871	1
sp|Q99MN9|PCCB_MOUSE	0.989694	0.999871	1
sp|Q99MR8|MCCA_MOUSE	0.992887	0.999871	1
sp|Q9CPY7|AMPL_MOUSE	0.745976	0.999871	1
sp|Q9CQ62|DECR_MOUSE	0.356132	0.999871	1
sp|Q9CYR6|AGM1_MOUSE	0.997598	0.999871	1
sp|Q9CZN7|GLYM_MOUSE	0.538347	0.999871	1
sp|Q9CZU6|CISY_MOUSE	0.496604	0.999871	1
sp|Q9D0F9|PGM1_MOUSE	0.496871	0.999871	1
sp|Q9D6Y7|MSRA_MOUSE	0.60189	0.999871	1
sp|Q9D6Y9|GLGB_MOUSE	0.76531	0.999871	1
sp|Q9D819|IPYR_MOUSE	0.91401	0.999871	1
sp|Q9DB29|IAH1_MOUSE	0.272215	0.999871	1
sp|Q9DBA8|HUTI_MOUSE	0.921285	0.999871	1
sp|Q9DBE0|CSAD_MOUSE	0.971554	0.999871	1
sp|Q9DBF1|AL7A1_MOUSE	0.360156	0.999871	1
sp|Q9DBT9|M2GD_MOUSE	0.390358	0.999871	1
sp|Q9DCD0|6PGD_MOUSE	0.559233	0.999871	1
sp|Q9DCG6|PBLD1_MOUSE	0.441108	0.999871	1
sp|Q9DCS2|MTL26_MOUSE	0.817752	0.999871	1
sp|Q9DCW4|ETFB_MOUSE;tr|A0A0N4SVE0|A0A0N4SVE0_MOUSE	0.879241	0.999871	1
sp|Q9EQ20|MMSA_MOUSE	0.870365	0.999871	1
sp|Q9EQH3|VPS35_MOUSE	0.999871	0.999871	1
sp|Q9ET01|PYGL_MOUSE	0.255392	0.999871	1
sp|Q9JHI5|IVD_MOUSE	0.370402	0.999871	1
sp|Q9JII6|AK1A1_MOUSE	0.360837	0.999871	1
sp|Q9JLJ2|AL9A1_MOUSE	0.721449	0.999871	1
sp|Q9JMD3|STA10_MOUSE	0.319695	0.999871	1
sp|Q9JMH6|TRXR1_MOUSE	0.645078	0.999871	1
sp|Q9QXE0|HACL1_MOUSE	0.655532	0.999871	1
sp|Q9QYG0|NDRG2_MOUSE	0.794153	0.999871	1
sp|Q9QZ85|IIGP1_MOUSE	0.543305	0.999871	1
sp|Q9R0P3|ESTD_MOUSE	0.940508	0.999871	1
sp|Q9WTP6|KAD2_MOUSE	0.647638	0.999871	1
sp|Q9Z2I8|SUCB2_MOUSE	0.914194	0.999871	1
sp|Q9Z2I9|SUCB1_MOUSE	0.672764	0.999871	1
sp|Q9Z2V4|PCKGC_MOUSE	0.581295	0.999871	1
tr|A8DUK4|A8DUK4_MOUSE;sp|P02088|HBB1_MOUSE	0.940203	0.999871	1
tr|E9Q035|E9Q035_MOUSE;sp|Q921I1|TRFE_MOUSE	0.931226	0.999871	1
tr|G3X9Y6|G3X9Y6_MOUSE	0.433814	0.999871	1
tr|Q80X81|Q80X81_MOUSE	0.458204	0.999871	1
tr|Q91WT7|Q91WT7_MOUSE	0.367067	0.999871	1
sp|O70251|EF1B_MOUSE	0.619229	0.999871	1
sp|P05064|ALDOA_MOUSE;tr|A6ZI47|A6ZI47_MOUSE;tr|A6ZI46|A6ZI46_MOUSE	0.989462	0.999871	1
sp|P27773|PDIA3_MOUSE	0.981364	0.999871	1
sp|P57780|ACTN4_MOUSE	0.921093	0.999871	1
sp|P61161|ARP2_MOUSE	0.973225	0.999871	1
sp|Q3ULD5|MCCB_MOUSE	0.950466	0.999871	1
sp|Q62348|TSN_MOUSE	0.990423	0.999871	1
sp|Q64516|GLPK_MOUSE	0.931305	0.999871	1
sp|Q64727|VINC_MOUSE	0.961114	0.999871	1
sp|Q8BFR5|EFTU_MOUSE	0.997114	0.999871	1
sp|Q8R0F9|S14L4_MOUSE	0.854991	0.999871	1
sp|Q91X44|GCKR_MOUSE	0.751801	0.999871	1
sp|Q91XE0|GLYAT_MOUSE	0.987785	0.999871	1
sp|Q922B2|SYDC_MOUSE	0.994132	0.999871	1
sp|Q922E4|PCY2_MOUSE	0.869249	0.999871	1
sp|Q99K67|AASS_MOUSE	0.699322	0.999871	1
sp|Q99PL5|RRBP1_MOUSE	0.901943	0.999871	1
sp|Q9WUM5|SUCA_MOUSE	0.907713	0.999871	1
sp|Q9Z0S1|BPNT1_MOUSE	0.97496	0.999871	1
sp|Q9Z1Q9|SYVC_MOUSE	0.713884	0.999871	1

## Sheet: GST_PECA
Protein	p-value	q-value (BH)	q-value (BY)
sp|P30115|GSTA3_MOUSE	1.27014e-32	5.34727e-30	3.54045e-29
sp|P10649|GSTM1_MOUSE	1.88197e-30	3.96156e-28	2.62296e-27
sp|Q9D8N0|EF1G_MOUSE	3.19024e-26	4.47697e-24	2.96422e-23
sp|P24472|GSTA4_MOUSE	1.95011e-23	2.05249e-21	1.35896e-20
sp|P00329|ADH1_MOUSE	2.79459e-21	2.35304e-19	1.55796e-18
sp|Q80W21|GSTM7_MOUSE	2.00317e-16	1.40556e-14	9.30626e-14
sp|P15626|GSTM2_MOUSE	2.6574e-16	1.59824e-14	1.0582e-13
sp|P12710|FABPL_MOUSE	1.15974e-13	6.10311e-12	4.04089e-11
sp|Q9CPU0|LGUL_MOUSE	3.31822e-11	1.55219e-09	1.02771e-08
sp|O35945|AL1A7_MOUSE	6.50373e-11	2.48915e-09	1.64808e-08
sp|P24549|AL1A1_MOUSE	6.44548e-11	2.48915e-09	1.64808e-08
sp|O09174|AMACR_MOUSE	7.88202e-11	2.76528e-09	1.8309e-08
sp|O35660|GSTM6_MOUSE	1.79009e-10	5.79713e-09	3.8383e-08
sp|Q91X34|BAAT_MOUSE	3.5784e-10	1.07608e-08	7.12474e-08
sp|Q64471|GSTT1_MOUSE	7.74884e-10	2.17484e-08	1.43997e-07
sp|Q00623|APOA1_MOUSE	1.63179e-09	4.29364e-08	2.84284e-07
sp|P07724|ALBU_MOUSE	3.44622e-09	8.2154e-08	5.43944e-07
sp|P09103|PDIA1_MOUSE	3.51252e-09	8.2154e-08	5.43944e-07
sp|Q9DCS2|MTL26_MOUSE	4.55362e-09	1.00899e-07	6.68054e-07
sp|P49429|HPPD_MOUSE	5.85358e-09	1.1735e-07	7.76981e-07
sp|Q91YI0|ARLY_MOUSE	5.69205e-09	1.1735e-07	7.76981e-07
sp|P11725|OTC_MOUSE	8.55e-09	1.63616e-07	1.08331e-06
sp|P19157|GSTP1_MOUSE	1.82099e-08	3.20231e-07	2.12026e-06
sp|Q8BH00|AL8A1_MOUSE	1.82554e-08	3.20231e-07	2.12026e-06
sp|Q9WVL0|MAAI_MOUSE	3.54733e-08	5.97371e-07	3.95521e-06
sp|Q64442|DHSO_MOUSE	2.14541e-06	3.47392e-05	0.000230009
sp|P47738|ALDH2_MOUSE	2.84652e-06	4.43847e-05	0.000293873
sp|P70694|DHB5_MOUSE	3.97164e-06	5.97164e-05	0.000395385
sp|P19639|GSTM3_MOUSE	5.5092e-06	7.85502e-05	0.000520083
sp|P48758|CBR1_MOUSE	5.5974e-06	7.85502e-05	0.000520083
sp|Q9DCM2|GSTK1_MOUSE	5.95229e-06	8.08359e-05	0.000535217
sp|Q61176|ARGI1_MOUSE	1.19429e-05	0.000157123	0.00104032
sp|Q60737|CSK21_MOUSE	3.17919e-05	0.000405588	0.00268541
sp|P32020|NLTP_MOUSE	3.94926e-05	0.000489011	0.00323776
sp|P63017|HSP7C_MOUSE	4.46876e-05	0.000522596	0.00346013
sp|Q9QXD6|F16P1_MOUSE	4.40756e-05	0.000522596	0.00346013
sp|Q8C196|CPSM_MOUSE	4.75935e-05	0.000541537	0.00358554
sp|P31786|ACBP_MOUSE	7.2952e-05	0.000808232	0.00535133
sp|P56480|ATPB_MOUSE	7.56522e-05	0.000816655	0.0054071
sp|P06151|LDHA_MOUSE	8.98802e-05	0.000945989	0.00626343
sp|Q99J08|S14L2_MOUSE	9.63006e-05	0.000988843	0.00654717
sp|P11499|HS90B_MOUSE	0.000106579	0.00104349	0.00690896
tr|Q8R5I6|Q8R5I6_MOUSE	0.000106474	0.00104349	0.00690896
sp|Q9DBA8|HUTI_MOUSE	0.000133292	0.00127537	0.00844425
sp|Q8QZS1|HIBCH_MOUSE	0.000159813	0.00149514	0.00989937
sp|P62259|1433E_MOUSE	0.000164345	0.00150411	0.00995878
sp|Q8VC12|HUTU_MOUSE	0.000176996	0.00158543	0.0104972
sp|Q91ZJ5|UGPA_MOUSE	0.000206218	0.0018087	0.0119755
sp|Q60692|PSB6_MOUSE	0.000243534	0.0020924	0.0138539
sp|Q80XD1|CHIO_MOUSE	0.000254087	0.00213941	0.0141651
sp|Q921C5|BICD2_MOUSE	0.00028692	0.0023685	0.0156819
sp|P35492|HUTH_MOUSE	0.0003313	0.00258291	0.0171016
sp|P50544|ACADV_MOUSE	0.000327056	0.00258291	0.0171016
sp|Q68FD5|CLH1_MOUSE	0.000321154	0.00258291	0.0171016
sp|Q8VC30|TKFC_MOUSE	0.000342467	0.00262143	0.0173566
sp|P48774|GSTM5_MOUSE	0.000368128	0.00276753	0.0183239
sp|P17182|ENOA_MOUSE	0.000427138	0.00315483	0.0208882
sp|Q9D0F9|PGM1_MOUSE	0.000456708	0.00331507	0.0219492
sp|Q78PY7|SND1_MOUSE	0.000657922	0.00469467	0.0310836
sp|P50247|SAHH_MOUSE	0.000681479	0.00478171	0.0316599
tr|K7N747|K7N747_MOUSE	0.000727467	0.00502072	0.0332424
sp|P08226|APOE_MOUSE	0.000759007	0.0051539	0.0341241
sp|Q01853|TERA_MOUSE	0.000809123	0.005407	0.0357999
sp|P28271|ACOC_MOUSE	0.000917165	0.00603323	0.0399462
sp|P05201|AATC_MOUSE	0.000957247	0.00603886	0.0399835
sp|P40142|TKT_MOUSE	0.000961053	0.00603886	0.0399835
sp|Q8BMS1|ECHA_MOUSE	0.000942208	0.00603886	0.0399835
sp|O09173|HGD_MOUSE	0.00100392	0.00619299	0.041004
sp|Q99L20|GSTT3_MOUSE	0.00102051	0.00619299	0.041004
sp|Q9QXS1|PLEC_MOUSE	0.00102971	0.00619299	0.041004
sp|Q60866|PTER_MOUSE	0.00118457	0.00692645	0.0458603
sp|Q91XD4|FTCD_MOUSE	0.00118257	0.00692645	0.0458603
sp|Q61598|GDIB_MOUSE	0.00129069	0.00744355	0.049284
sp|P14152|MDHC_MOUSE	0.00131328	0.00747147	0.0494689
sp|Q9DBT9|M2GD_MOUSE	0.0017633	0.00976775	0.0646727
sp|Q9EQF5|DPYS_MOUSE	0.00174933	0.00976775	0.0646727
sp|P54869|HMCS2_MOUSE	0.00189743	0.0103743	0.0686883
sp|Q8K183|PDXK_MOUSE	0.00193242	0.0104301	0.069058
sp|P16331|PH4H_MOUSE	0.00196191	0.0104553	0.0692247
sp|Q8VCX1|AK1D1_MOUSE	0.00233672	0.012297	0.081419
sp|P52196|THTR_MOUSE	0.0023867	0.012405	0.0821336
sp|P07901|HS90A_MOUSE	0.00250997	0.0128866	0.0853224
sp|Q9JMD3|STA10_MOUSE	0.00275184	0.0139581	0.0924174
sp|P58252|EF2_MOUSE	0.0028732	0.0144002	0.0953444
sp|Q9QUM9|PSA6_MOUSE	0.00300531	0.0148851	0.0985551
sp|Q9JII6|AK1A1_MOUSE	0.00309786	0.0151651	0.100409
sp|Q9R0H0|ACOX1_MOUSE	0.00328572	0.0158998	0.105273
sp|Q71RI9|KAT3_MOUSE	0.00355248	0.0169954	0.112527
sp|P13707|GPDA_MOUSE	0.00379621	0.0179239	0.118675
sp|Q99KR3|LACB2_MOUSE	0.00383171	0.0179239	0.118675
sp|P99029|PRDX5_MOUSE	0.00400595	0.0183316	0.121374
sp|Q99KB8|GLO2_MOUSE	0.00397794	0.0183316	0.121374
sp|Q61425|HCDH_MOUSE	0.00421018	0.019059	0.12619
sp|Q60759|GCDH_MOUSE	0.00427002	0.0191243	0.126622
sp|Q91YR1|TWF1_MOUSE	0.00472251	0.0209282	0.138566
sp|Q91X83|METK1_MOUSE	0.00508936	0.0220889	0.146251
sp|Q9ET01|PYGL_MOUSE	0.00505059	0.0220889	0.146251
sp|Q9WUM4|COR1C_MOUSE	0.00528275	0.0226942	0.150259
sp|Q9D0S9|HINT2_MOUSE	0.0055329	0.0235288	0.155785
sp|P55264|ADK_MOUSE	0.0064537	0.0271701	0.179894
sp|A3KMP2|TTC38_MOUSE	0.00666358	0.0277759	0.183905
sp|P28474|ADHX_MOUSE	0.00774601	0.0319713	0.211683
sp|Q93092|TALDO_MOUSE	0.00790312	0.0323031	0.21388
sp|O08709|PRDX6_MOUSE	0.00811264	0.0328406	0.217439
sp|Q9CQ62|DECR_MOUSE	0.00863406	0.0340888	0.225703
sp|Q9JLJ2|AL9A1_MOUSE	0.00863971	0.0340888	0.225703
sp|Q9QYG0|NDRG2_MOUSE	0.00866389	0.0340888	0.225703
sp|P10518|HEM2_MOUSE	0.00905662	0.0352939	0.233682
sp|Q99JY9|ARP3_MOUSE	0.00913786	0.0352939	0.233682
sp|P80313|TCPH_MOUSE	0.0100848	0.0385973	0.255554
sp|P34914|HYES_MOUSE	0.0106531	0.0393936	0.260826
sp|Q9CXF0|KYNU_MOUSE	0.0106671	0.0393936	0.260826
sp|Q9JHI5|IVD_MOUSE	0.0103925	0.0393936	0.260826
sp|Q9WVJ2|PSD13_MOUSE	0.0105059	0.0393936	0.260826
sp|O88844|IDHC_MOUSE	0.0108428	0.039694	0.262816
sp|P00920|CAH2_MOUSE	0.0110549	0.039786	0.263425
sp|P46471|PRS7_MOUSE	0.0111514	0.039786	0.263425
sp|P51855|GSHB_MOUSE	0.0111211	0.039786	0.263425
CON__Streptavidin	0.0114209	0.0400683	0.265293
sp|P26638|SYSC_MOUSE	0.0113651	0.0400683	0.265293
sp|P57776|EF1D_MOUSE	0.012553	0.0436763	0.289182
sp|Q9DBF1|AL7A1_MOUSE	0.0127199	0.043894	0.290624
sp|Q8BVI4|DHPR_MOUSE	0.0129646	0.044017	0.291438
sp|Q8K354|CBR3_MOUSE	0.012964	0.044017	0.291438
sp|Q91X91|NADC_MOUSE	0.014056	0.0473406	0.313444
sp|P70168|IMB1_MOUSE	0.0146583	0.0489773	0.324281
sp|Q8VCR7|ABHEB_MOUSE	0.0153917	0.0510227	0.337823
REV__sp|Q9Z140|CPNE6_MOUSE	0.0160224	0.0521837	0.34551
sp|Q99LB7|SARDH_MOUSE	0.0159757	0.0521837	0.34551
sp|Q99LX0|PARK7_MOUSE	0.0161137	0.0521837	0.34551
sp|Q8K157|GALM_MOUSE	0.0175605	0.056435	0.373658
sp|Q9Z2I9|SUCB1_MOUSE	0.0184016	0.0586899	0.388588
sp|Q9D0R2|SYTC_MOUSE	0.0190988	0.0604556	0.400279
sp|P48036|ANXA5_MOUSE	0.0193117	0.0606733	0.40172
sp|Q3U1J4|DDB1_MOUSE	0.0198978	0.0615954	0.407825
sp|Q99MZ7|PECR_MOUSE	0.019766	0.0615954	0.407825
sp|P63101|1433Z_MOUSE	0.0201928	0.0620524	0.410851
sp|P00375|DYR_MOUSE	0.0212956	0.0644995	0.427053
sp|P70349|HINT1_MOUSE	0.0211834	0.0644995	0.427053
sp|Q91V64|ISOC1_MOUSE	0.0220869	0.0664183	0.439758
sp|Q8BP47|SYNC_MOUSE	0.0233101	0.0695996	0.460822
sp|Q9DCG6|PBLD1_MOUSE	0.0244992	0.0721272	0.477556
sp|Q9JM62|REEP6_MOUSE	0.0244293	0.0721272	0.477556
sp|P62192|PRS4_MOUSE	0.0248266	0.0725833	0.480577
REV__sp|Q925D8|TS1R3_MOUSE	0.0250911	0.0728506	0.482346
sp|P35505|FAAA_MOUSE	0.0255248	0.0736022	0.487323
sp|Q9CZN7|GLYM_MOUSE	0.0263113	0.0753541	0.498922
sp|P07309|TTHY_MOUSE	0.0275594	0.0778691	0.515574
sp|Q9CPY7|AMPL_MOUSE	0.0275123	0.0778691	0.515574
sp|Q8VCN5|CGL_MOUSE	0.0281411	0.0789828	0.522948
sp|Q8VCR2|DHB13_MOUSE	0.0284204	0.0792383	0.52464
sp|Q8R0Y6|AL1L1_MOUSE	0.0291035	0.0806091	0.533716
sp|P42125|ECI1_MOUSE	0.0293682	0.0808106	0.53505
sp|P05202|AATM_MOUSE	0.0301861	0.0821711	0.544058
sp|P60766|CDC42_MOUSE	0.030253	0.0821711	0.544058
sp|Q64105|SPRE_MOUSE	0.0306004	0.082582	0.546778
sp|Q78JT3|3HAO_MOUSE	0.031023	0.0831892	0.550798
sp|Q91Z53|GRHPR_MOUSE	0.0314636	0.0838365	0.555084
sp|P14824|ANXA6_MOUSE	0.0321332	0.0850821	0.563332
sp|Q8CHT0|AL4A1_MOUSE	0.033945	0.0893178	0.591377
sp|Q9D6Y9|GLGB_MOUSE	0.0364729	0.0953731	0.631469
sp|P61982|1433G_MOUSE	0.0369386	0.0959946	0.635584
sp|Q9EPQ7|STAR5_MOUSE	0.0377585	0.0969288	0.641769
sp|Q9R1P0|PSA4_MOUSE	0.0375947	0.0969288	0.641769
sp|Q9QYB1|CLIC4_MOUSE	0.0380082	0.0969785	0.642098
sp|Q91XE4|ACY3_MOUSE	0.0392503	0.0989485	0.655141
sp|Q9D6Y7|MSRA_MOUSE	0.0390903	0.0989485	0.655141
sp|P17742|PPIA_MOUSE	0.0414208	0.103798	0.687253
sp|P17751|TPIS_MOUSE	0.0418975	0.104372	0.691049
sp|P06745|G6PI_MOUSE	0.0436271	0.106785	0.707027
sp|Q9D2G2|ODO2_MOUSE	0.0435534	0.106785	0.707027
sp|Q9EQH3|VPS35_MOUSE	0.0435773	0.106785	0.707027
sp|Q9D1A2|CNDP2_MOUSE	0.0462498	0.112272	0.743356
tr|G3X9Y6|G3X9Y6_MOUSE	0.0464021	0.112272	0.743356
sp|Q9QXD1|ACOX2_MOUSE	0.0472579	0.113689	0.752739
sp|Q8BWT1|THIM_MOUSE	0.0508187	0.120874	0.800311
sp|Q91V92|ACLY_MOUSE	0.0508033	0.120874	0.800311
sp|Q99K51|PLST_MOUSE	0.0515868	0.122011	0.807842
sp|Q9D826|SOX_MOUSE	0.0538259	0.126596	0.838198
sp|Q9Z1Q5|CLIC1_MOUSE	0.0544807	0.127424	0.843681
tr|F6RWR5|F6RWR5_MOUSE	0.0549474	0.127806	0.846207
sp|P47754|CAZA2_MOUSE	0.0554562	0.128281	0.849351
sp|Q99L47|F10A1_MOUSE	0.0568964	0.130893	0.866645
sp|P99026|PSB4_MOUSE	0.0573276	0.131168	0.868469
sp|P61089|UBE2N_MOUSE	0.0578355	0.131615	0.871426
CON__P02769	0.0591911	0.131849	0.872977
sp|E9Q557|DESP_MOUSE	0.058364	0.131849	0.872977
sp|O08601|MTP_MOUSE	0.0591413	0.131849	0.872977
sp|P42932|TCPQ_MOUSE	0.0591036	0.131849	0.872977
sp|Q9QZ85|IIGP1_MOUSE	0.0609526	0.135058	0.894225
sp|Q9DB29|IAH1_MOUSE	0.0641149	0.140138	0.927859
sp|Q9Z1Q9|SYVC_MOUSE	0.0637337	0.140138	0.927859
tr|Q9JLI0|Q9JLI0_MOUSE	0.0642438	0.140138	0.927859
sp|P09411|PGK1_MOUSE	0.066096	0.143435	0.94969
sp|O70435|PSA3_MOUSE	0.0668484	0.1439	0.952766
sp|Q3UQ44|IQGA2_MOUSE	0.0669937	0.1439	0.952766
sp|P10126|EF1A1_MOUSE	0.0699086	0.148644	0.984178
sp|Q8VCT3|AMPB_MOUSE	0.0696222	0.148644	0.984178
sp|Q61792|LASP1_MOUSE	0.0708231	0.149832	0.992042
sp|P61750|ARF4_MOUSE	0.0752534	0.157832	1
sp|Q07076|ANXA7_MOUSE	0.0753543	0.157832	1
sp|Q9JI75|NQO2_MOUSE	0.0759603	0.158313	1
sp|P27773|PDIA3_MOUSE	0.0776573	0.159278	1
sp|P51660|DHB4_MOUSE	0.0781847	0.159278	1
sp|Q3UEG6|AGT2_MOUSE	0.0768414	0.159278	1
sp|Q61133|GSTT2_MOUSE	0.0783147	0.159278	1
sp|Q9WTP6|KAD2_MOUSE	0.0774121	0.159278	1
sp|P47791|GSHR_MOUSE	0.0800166	0.161182	1
sp|Q60936|COQ8A_MOUSE	0.0798715	0.161182	1
sp|Q9DBB8|DHDH_MOUSE	0.0814055	0.163199	1
sp|P50431|GLYC_MOUSE	0.0827349	0.165078	1
sp|P35700|PRDX1_MOUSE	0.0858287	0.169643	1
sp|Q61316|HSP74_MOUSE	0.0855434	0.169643	1
sp|Q91WU0|CES1F_MOUSE	0.0894331	0.175941	1
sp|O35215|DOPD_MOUSE	0.0905609	0.17651	1
sp|P24270|CATA_MOUSE	0.0901828	0.17651	1
sp|Q80W22|THNS2_MOUSE	0.0943019	0.182954	1
sp|Q8BG32|PSD11_MOUSE	0.0959706	0.185338	1
sp|Q8QZR3|EST2A_MOUSE	0.0972446	0.18694	1
sp|Q99PT1|GDIR1_MOUSE	0.0990924	0.189627	1
sp|Q8CHR6|DPYD_MOUSE	0.0996575	0.189845	1
sp|P08113|ENPL_MOUSE	0.101582	0.192641	1
sp|Q91WT9|CBS_MOUSE	0.104148	0.196621	1
sp|Q9DCD0|6PGD_MOUSE	0.105148	0.197623	1
sp|P22599|A1AT2_MOUSE	0.10766	0.201444	1
sp|O35490|BHMT1_MOUSE	0.109742	0.203514	1
sp|P42225|STAT1_MOUSE	0.110557	0.203514	1
sp|P59999|ARPC4_MOUSE	0.109854	0.203514	1
sp|Q8BWP5|TTPA_MOUSE	0.111184	0.203514	1
sp|Q922D8|C1TC_MOUSE	0.11077	0.203514	1
sp|Q3UZZ6|ST1D1_MOUSE	0.115911	0.210339	1
sp|Q8R1G2|CMBL_MOUSE	0.115447	0.210339	1
sp|P47757|CAPZB_MOUSE	0.118644	0.21402	1
sp|Q571F8|GLSL_MOUSE	0.118957	0.21402	1
tr|Q91WT7|Q91WT7_MOUSE	0.125656	0.225111	1
sp|P01942|HBA_MOUSE	0.126933	0.226435	1
sp|P61922|GABT_MOUSE	0.129436	0.229926	1
sp|P41216|ACSL1_MOUSE	0.134052	0.236821	1
sp|Q9EQ20|MMSA_MOUSE	0.134442	0.236821	1
sp|P52760|RIDA_MOUSE	0.13728	0.240811	1
sp|P34884|MIF_MOUSE	0.141925	0.246902	1
sp|Q8BWU8|AT2L1_MOUSE	0.141585	0.246902	1
sp|Q9DBP5|KCY_MOUSE	0.142575	0.247013	1
sp|P60710|ACTB_MOUSE	0.144125	0.248675	1
sp|P68510|1433F_MOUSE	0.147942	0.254219	1
sp|O08749|DLDH_MOUSE	0.151471	0.258414	1
sp|Q9CRB3|HIUH_MOUSE	0.151611	0.258414	1
sp|O55060|TPMT_MOUSE	0.15387	0.260347	1
sp|Q99K67|AASS_MOUSE	0.153982	0.260347	1
sp|Q91VA0|ACSM1_MOUSE	0.155309	0.261541	1
sp|Q91YP0|L2HDH_MOUSE	0.160102	0.268537	1
sp|Q9QUR6|PPCE_MOUSE	0.161454	0.26973	1
sp|Q91WK2|EIF3H_MOUSE	0.163121	0.271438	1
sp|P08228|SODC_MOUSE	0.165932	0.275009	1
sp|P10639|THIO_MOUSE	0.166573	0.275009	1
sp|P16332|MUTA_MOUSE	0.171168	0.281492	1
sp|P84084|ARF5_MOUSE	0.172879	0.283199	1
sp|Q8CGK3|LONM_MOUSE	0.175947	0.287107	1
sp|P06801|MAOX_MOUSE	0.17843	0.290034	1
sp|P51174|ACADL_MOUSE	0.17914	0.290068	1
sp|Q91X52|DCXR_MOUSE	0.18028	0.290797	1
sp|P45952|ACADM_MOUSE	0.182603	0.29342	1
sp|Q9CZL5|PHS2_MOUSE	0.18622	0.298094	1
REV__sp|Q9JIC3|DCR1A_MOUSE	0.188018	0.299832	1
sp|P80314|TCPB_MOUSE	0.189323	0.300774	1
sp|O08807|PRDX4_MOUSE	0.191542	0.302373	1
sp|O55125|NIPS1_MOUSE	0.192485	0.302373	1
sp|Q924Y0|BODG_MOUSE	0.192078	0.302373	1
sp|A2ADY9|DDI2_MOUSE	0.194626	0.3046	1
sp|Q61233|PLSL_MOUSE	0.198545	0.308441	1
sp|Q9CWJ9|PUR9_MOUSE	0.197828	0.308441	1
sp|Q61081|CDC37_MOUSE	0.201377	0.31169	1
sp|O70456|1433S_MOUSE	0.20275	0.312665	1
sp|Q9CQV8|1433B_MOUSE	0.203845	0.313207	1
tr|Q792Z1|Q792Z1_MOUSE	0.206424	0.316016	1
sp|P26443|DHE3_MOUSE	0.207297	0.316204	1
CON__P01966	0.210296	0.319006	1
sp|Q9DBM2|ECHP_MOUSE	0.21065	0.319006	1
sp|P97807|FUMH_MOUSE	0.216499	0.326689	1
sp|Q8BFZ3|ACTBL_MOUSE	0.219082	0.327573	1
sp|Q99KI0|ACON_MOUSE	0.219419	0.327573	1
sp|Q9CZS1|AL1B1_MOUSE	0.217965	0.327573	1
sp|P27005|S10A8_MOUSE	0.221042	0.328829	1
CON__P07477	0.233005	0.345406	1
sp|P52825|CPT2_MOUSE	0.236684	0.347599	1
sp|Q921H8|THIKA_MOUSE	0.235385	0.347599	1
sp|Q9QXE0|HACL1_MOUSE	0.236962	0.347599	1
sp|P45377|ALD2_MOUSE	0.238205	0.348209	1
sp|P09671|SODM_MOUSE	0.247723	0.356427	1
sp|P63037|DNJA1_MOUSE	0.24806	0.356427	1
sp|Q8R0F9|S14L4_MOUSE	0.246869	0.356427	1
sp|Q9DC50|OCTC_MOUSE	0.247322	0.356427	1
sp|Q9Z2V4|PCKGC_MOUSE	0.246192	0.356427	1
sp|P53657|KPYR_MOUSE	0.255379	0.363225	1
sp|Q02053|UBA1_MOUSE	0.254337	0.363225	1
sp|Q61171|PRDX2_MOUSE	0.254639	0.363225	1
sp|P07356|ANXA2_MOUSE	0.261761	0.370415	1
sp|Q02257|PLAK_MOUSE	0.262194	0.370415	1
sp|Q9D6R2|IDH3A_MOUSE	0.264665	0.372656	1
sp|P62774|MTPN_MOUSE	0.26562	0.372754	1
tr|A8DUK4|A8DUK4_MOUSE	0.267113	0.373603	1
sp|P17563|SBP1_MOUSE	0.269275	0.37455	1
sp|Q9JMH6|TRXR1_MOUSE	0.269569	0.37455	1
sp|P57780|ACTN4_MOUSE	0.271338	0.375767	1
sp|P54071|IDHP_MOUSE	0.274003	0.378214	1
sp|P70266|F261_MOUSE	0.276624	0.380585	1
sp|P38647|GRP75_MOUSE	0.287536	0.394309	1
sp|Q64516|GLPK_MOUSE	0.288949	0.39496	1
sp|Q5SW19|CLU_MOUSE	0.290917	0.396363	1
sp|Q91Y97|ALDOB_MOUSE	0.297304	0.403758	1
sp|Q63880|EST3A_MOUSE	0.307347	0.414925	1
sp|Q9DBC0|SELO_MOUSE	0.307498	0.414925	1
sp|Q922R8|PDIA6_MOUSE	0.308989	0.415604	1
sp|Q62426|CYTB_MOUSE	0.318351	0.426834	1
sp|P22315|HEMH_MOUSE	0.329842	0.439441	1
sp|Q91V76|CK054_MOUSE	0.329807	0.439441	1
sp|Q8BGT5|ALAT2_MOUSE	0.338286	0.44927	1
sp|Q03145|EPHA2_MOUSE	0.341456	0.452053	1
sp|Q61838|PZP_MOUSE	0.345997	0.456629	1
sp|O70251|EF1B_MOUSE	0.348589	0.458613	1
sp|P63028|TCTP_MOUSE	0.356795	0.467946	1
sp|P01027|CO3_MOUSE	0.362652	0.474151	1
CON__Q5D862	0.380163	0.495506	1
sp|O55137|ACOT1_MOUSE	0.388906	0.505338	1
sp|P16015|CAH3_MOUSE	0.402783	0.520454	1
sp|Q5XJY5|COPD_MOUSE	0.403012	0.520454	1
sp|P68254|1433T_MOUSE	0.405194	0.521672	1
sp|P70296|PEBP1_MOUSE	0.412282	0.529179	1
sp|Q8CG76|ARK72_MOUSE	0.417124	0.533767	1
sp|P60335|PCBP1_MOUSE	0.444299	0.566818	1
sp|O70475|UGDH_MOUSE	0.456502	0.580626	1
sp|Q99JY0|ECHB_MOUSE	0.458763	0.581745	1
sp|P16460|ASSY_MOUSE	0.468643	0.592489	1
sp|Q8VCT4|CES1D_MOUSE	0.476027	0.600023	1
sp|P50543|S10AB_MOUSE	0.481172	0.602897	1
sp|Q8QZT1|THIL_MOUSE	0.481077	0.602897	1
sp|Q91VI7|RINI_MOUSE	0.48403	0.604679	1
sp|P23492|PNPH_MOUSE	0.490279	0.610673	1
sp|G3X982|AOXC_MOUSE	0.494962	0.614687	1
CON__P20930	0.499545	0.614937	1
sp|P18760|COF1_MOUSE	0.498765	0.614937	1
sp|P97328|KHK_MOUSE	0.499459	0.614937	1
sp|P70195|PSB7_MOUSE	0.50176	0.615863	1
sp|O88342|WDR1_MOUSE	0.507285	0.620835	1
sp|Q9DBE0|CSAD_MOUSE	0.510826	0.621554	1
sp|Q9ET30|TM9S3_MOUSE	0.510574	0.621554	1
CON__P04264	0.5201	0.631015	1
sp|P80316|TCPE_MOUSE	0.538059	0.650928	1
sp|Q7TMK9|HNRPQ_MOUSE	0.540953	0.652553	1
sp|O35423|SPYA_MOUSE	0.550642	0.661898	1
sp|Q9QYR9|ACOT2_MOUSE	0.551844	0.661898	1
sp|Q9Z2I8|SUCB2_MOUSE	0.553673	0.662206	1
sp|Q9CZU6|CISY_MOUSE	0.556316	0.663482	1
sp|P15105|GLNA_MOUSE	0.56042	0.666352	1
sp|Q9JM76|ARPC3_MOUSE	0.561888	0.666352	1
REV__sp|Q71LX4|TLN2_MOUSE	0.576572	0.681845	1
sp|P99024|TBB5_MOUSE	0.579142	0.682965	1
CON__Q6KB66-1	0.589021	0.692676	1
sp|Q9WUU7|CATZ_MOUSE	0.594437	0.697098	1
sp|A2AJL3|FGGY_MOUSE	0.600504	0.702257	1
sp|Q8BMA6|SRP68_MOUSE	0.607709	0.708713	1
sp|O55135|IF6_MOUSE	0.612456	0.711156	1
sp|Q91X44|GCKR_MOUSE	0.613182	0.711156	1
sp|P30416|FKBP4_MOUSE	0.616913	0.713517	1
sp|P08249|MDHM_MOUSE	0.639269	0.735334	1
sp|Q64374|RGN_MOUSE	0.638929	0.735334	1
CON__P13647	0.649346	0.744336	1
sp|P19096|FAS_MOUSE	0.652399	0.744336	1
sp|Q9CQN1|TRAP1_MOUSE	0.65221	0.744336	1
sp|P63158|HMGB1_MOUSE	0.673009	0.765776	1
sp|Q9QXF8|GNMT_MOUSE	0.676186	0.767317	1
sp|P40936|INMT_MOUSE	0.690592	0.781557	1
sp|O55029|COPB2_MOUSE	0.692449	0.781558	1
sp|P07759|SPA3K_MOUSE	0.698067	0.785792	1
sp|P63038|CH60_MOUSE	0.703706	0.787926	1
sp|Q923D2|BLVRB_MOUSE	0.70349	0.787926	1
sp|Q9Z0S1|BPNT1_MOUSE	0.705835	0.788214	1
sp|Q8CDN6|TXNL1_MOUSE	0.708709	0.789329	1
sp|P20029|BIP_MOUSE	0.723054	0.803182	1
sp|P62141|PP1B_MOUSE	0.732981	0.809934	1
sp|Q9JHW2|NIT2_MOUSE	0.731549	0.809934	1
sp|Q60864|STIP1_MOUSE	0.741363	0.817052	1
sp|Q99PL5|RRBP1_MOUSE	0.762084	0.837695	1
sp|O88533|DDC_MOUSE	0.764682	0.838363	1
sp|P68368|TBA4A_MOUSE	0.768106	0.839929	1
sp|Q8BH95|ECHM_MOUSE	0.770302	0.840148	1
sp|P38060|HMGCL_MOUSE	0.779215	0.847674	1
sp|P11983|TCPA_MOUSE	0.797158	0.864957	1
sp|P52792|HXK4_MOUSE	0.822518	0.89018	1
sp|Q07417|ACADS_MOUSE	0.825021	0.890599	1
sp|Q8VBT2|SDHL_MOUSE	0.835969	0.90011	1
sp|Q03249|GALT_MOUSE	0.845204	0.907732	1
CON__P02533	0.862395	0.923838	1
sp|Q8BT60|CPNE3_MOUSE	0.875627	0.935632	1
sp|P04117|FABP4_MOUSE	0.884298	0.942505	1
sp|P25688|URIC_MOUSE	0.899968	0.953246	1
sp|Q6ZWX6|IF2A_MOUSE	0.90273	0.953246	1
sp|Q9CQE1|NPS3B_MOUSE	0.903433	0.953246	1
tr|Q8BGL3|Q8BGL3_MOUSE	0.898864	0.953246	1
sp|P26883|FKB1A_MOUSE	0.916126	0.959497	1
sp|Q60854|SPB6_MOUSE	0.916194	0.959497	1
sp|Q8K010|OPLA_MOUSE	0.912404	0.959497	1
sp|P26516|PSMD7_MOUSE	0.938104	0.980005	1
sp|Q8VCH0|THIKB_MOUSE	0.945069	0.984837	1
CON__P00761	0.999584	1	1
CON__P13645	0.965356	1	1
CON__Q86YZ3	0.999996	1	1
sp|E9Q4Z2|ACACB_MOUSE	0.999996	1	1
sp|O88569|ROA2_MOUSE	0.980504	1	1
sp|P11352|GPX1_MOUSE	0.992066	1	1
sp|P21981|TGM2_MOUSE	0.999883	1	1
sp|P60843|IF4A1_MOUSE	0.991701	1	1
sp|P80317|TCPZ_MOUSE	0.988791	1	1
sp|Q05920|PYC_MOUSE	1	1	1
sp|Q63836|SBP2_MOUSE	0.980881	1	1
sp|Q8CGC7|SYEP_MOUSE	0.999592	1	1
sp|Q91ZA3|PCCA_MOUSE	1	1	1
sp|Q920E5|FPPS_MOUSE	0.993949	1	1
sp|Q9CYR6|AGM1_MOUSE	0.997344	1	1
sp|Q9JK38|GNA1_MOUSE	0.984266	1	1
sp|Q9JK84|PAR6G_MOUSE	0.96606	1	1

## Sheet: GST_MSstats
Protein	p-value	q-value (BH)	q-value (BY)
sp|P30115|GSTA3_MOUSE	0.000417319	0.148983	0.961887
sp|Q60759|GCDH_MOUSE	0.00131309	0.177496	1
sp|Q9JK84|PAR6G_MOUSE	0.00149156	0.177496	1
sp|P00329|ADH1_MOUSE	0.00345229	0.211929	1
sp|P48758|CBR1_MOUSE;tr|A0A1B0GRG8|A0A1B0GRG8_MOUSE	0.00273074	0.211929	1
sp|Q64471|GSTT1_MOUSE	0.00356184	0.211929	1
sp|P09103|PDIA1_MOUSE	0.0124139	0.232409	1
sp|P10649|GSTM1_MOUSE	0.00540634	0.232409	1
sp|P12710|FABPL_MOUSE	0.00985925	0.232409	1
sp|P19157|GSTP1_MOUSE;sp|P46425|GSTP2_MOUSE	0.00899966	0.232409	1
sp|P24549|AL1A1_MOUSE	0.0130201	0.232409	1
sp|P31786|ACBP_MOUSE	0.0119333	0.232409	1
sp|P70349|HINT1_MOUSE	0.00716367	0.232409	1
sp|Q05920|PYC_MOUSE	0.0105851	0.232409	1
sp|Q5SWU9|ACACA_MOUSE	0.00751603	0.232409	1
sp|Q63880|EST3A_MOUSE	0.00942198	0.232409	1
sp|Q64442|DHSO_MOUSE	0.00968518	0.232409	1
sp|Q8BH00|AL8A1_MOUSE	0.0119137	0.232409	1
sp|Q8QZS1|HIBCH_MOUSE	0.00820142	0.232409	1
sp|Q9D8N0|EF1G_MOUSE	0.00457452	0.232409	1
sp|P11352|GPX1_MOUSE	0.0171522	0.235512	1
sp|P11499|HS90B_MOUSE;REV__sp|Q8BL66|EEA1_MOUSE	0.0160948	0.235512	1
sp|Q9CZY3|UB2V1_MOUSE	0.0150585	0.235512	1
sp|Q9DCM2|GSTK1_MOUSE	0.0165802	0.235512	1
sp|Q9QXG4|ACSA_MOUSE	0.01578	0.235512	1
tr|E9Q035|E9Q035_MOUSE;sp|Q921I1|TRFE_MOUSE;CON__Q2HJF0;sp|P47758|SRPRB_MOUSE;CON__Q29443;CON__Q0IIK2	0.0148733	0.235512	1
sp|Q8BT60|CPNE3_MOUSE	0.0213711	0.238422	1
sp|Q91V76|CK054_MOUSE	0.0211155	0.238422	1
sp|Q91ZA3|PCCA_MOUSE	0.0204084	0.238422	1
sp|Q99MR8|MCCA_MOUSE	0.0209486	0.238422	1
sp|Q9CPU0|LGUL_MOUSE	0.0194395	0.238422	1
sp|Q9DBJ1|PGAM1_MOUSE;sp|O70250|PGAM2_MOUSE	0.0180369	0.238422	1
sp|P15626|GSTM2_MOUSE;tr|F6Y363|F6Y363_MOUSE	0.0244076	0.25628	1
sp|Q61133|GSTT2_MOUSE	0.0242536	0.25628	1
sp|P38060|HMGCL_MOUSE;sp|Q8JZS7|HMGC2_MOUSE	0.0259701	0.264371	1
sp|Q922M7|ASHWN_MOUSE	0.0266593	0.264371	1
sp|P49429|HPPD_MOUSE	0.0280351	0.264483	1
sp|Q99MN9|PCCB_MOUSE	0.0281522	0.264483	1
sp|P24472|GSTA4_MOUSE	0.030176	0.276227	1
sp|O08529|CAN2_MOUSE	0.0347276	0.284148	1
sp|P70296|PEBP1_MOUSE	0.0328469	0.284148	1
sp|Q3TNA1|XYLB_MOUSE	0.0350211	0.284148	1
sp|Q99L20|GSTT3_MOUSE	0.0346329	0.284148	1
sp|Q9D819|IPYR_MOUSE	0.0320121	0.284148	1
sp|O35945|AL1A7_MOUSE	0.0403107	0.29927	1
sp|Q07417|ACADS_MOUSE	0.0399795	0.29927	1
sp|Q91ZJ5|UGPA_MOUSE	0.040989	0.29927	1
sp|Q923D2|BLVRB_MOUSE	0.0394625	0.29927	1
sp|Q9DCQ2|ASPD_MOUSE	0.0410763	0.29927	1
sp|P60335|PCBP1_MOUSE	0.0423228	0.302185	1
sp|P07724|ALBU_MOUSE;CON__P02768-1	0.0457788	0.318482	1
sp|P19639|GSTM3_MOUSE	0.0493244	0.318482	1
sp|P70168|IMB1_MOUSE	0.049958	0.318482	1
sp|P97328|KHK_MOUSE	0.0482804	0.318482	1
sp|Q922E4|PCY2_MOUSE	0.0484698	0.318482	1
sp|Q9DCW4|ETFB_MOUSE;tr|A0A0N4SVE0|A0A0N4SVE0_MOUSE	0.0491463	0.318482	1
sp|P09411|PGK1_MOUSE;sp|P09041|PGK2_MOUSE	0.0574959	0.347255	1
sp|P17563|SBP1_MOUSE	0.0567746	0.347255	1
sp|Q8BWT1|THIM_MOUSE	0.0583622	0.347255	1
sp|Q91YI0|ARLY_MOUSE	0.0559437	0.347255	1
sp|E9Q4Z2|ACACB_MOUSE	0.0598841	0.350469	1
sp|Q9JHW2|NIT2_MOUSE	0.0616689	0.355094	1
tr|A0A0A6YW67|A0A0A6YW67_MOUSE;sp|P62984|RL40_MOUSE;sp|P62983|RS27A_MOUSE;sp|P0CG49|UBB_MOUSE;sp|P0CG50|UBC_MOUSE	0.0628994	0.35643	1
sp|Q03265|ATPA_MOUSE	0.0645531	0.360085	1
sp|Q9QYB1|CLIC4_MOUSE	0.0706109	0.387817	1
sp|Q60692|PSB6_MOUSE	0.0725526	0.392443	1
sp|Q80XD1|CHIO_MOUSE	0.0775784	0.407287	1
sp|Q922D8|C1TC_MOUSE	0.0768853	0.407287	1
sp|P20108|PRDX3_MOUSE	0.0831856	0.409327	1
sp|P97364|SPS2_MOUSE	0.0829133	0.409327	1
sp|Q8VCW8|ACSF2_MOUSE	0.0823739	0.409327	1
sp|Q91WT9|CBS_MOUSE	0.0808485	0.409327	1
sp|Q9WUM5|SUCA_MOUSE	0.0836999	0.409327	1
sp|P63028|TCTP_MOUSE	0.0888969	0.428867	1
sp|P11983|TCPA_MOUSE	0.0984456	0.436628	1
sp|P27005|S10A8_MOUSE	0.101266	0.436628	1
sp|P56480|ATPB_MOUSE	0.100184	0.436628	1
sp|P70195|PSB7_MOUSE	0.0959852	0.436628	1
sp|P70694|DHB5_MOUSE;tr|Q3UXL1|Q3UXL1_MOUSE;sp|Q8K023|AKC1H_MOUSE	0.0966048	0.436628	1
sp|Q8C196|CPSM_MOUSE;sp|B2RQC6|PYR1_MOUSE	0.0972643	0.436628	1
sp|Q91X91|NADC_MOUSE	0.101513	0.436628	1
sp|Q9EQF5|DPYS_MOUSE	0.0921696	0.436628	1
sp|Q9WVL0|MAAI_MOUSE	0.093008	0.436628	1
sp|P63038|CH60_MOUSE	0.105719	0.449305	1
sp|O08709|PRDX6_MOUSE;tr|Q8BG37|Q8BG37_MOUSE	0.111715	0.461892	1
sp|Q61176|ARGI1_MOUSE	0.111793	0.461892	1
sp|Q91Y97|ALDOB_MOUSE	0.112562	0.461892	1
sp|P62259|1433E_MOUSE	0.115224	0.462189	1
sp|Q8R0Y6|AL1L1_MOUSE;sp|Q8K009|AL1L2_MOUSE	0.114271	0.462189	1
sp|P63017|HSP7C_MOUSE;sp|P17156|HSP72_MOUSE;sp|Q61696|HS71A_MOUSE;sp|P16627|HS71L_MOUSE;sp|P17879|HS71B_MOUSE	0.117977	0.462351	1
sp|Q64727|VINC_MOUSE	0.119072	0.462351	1
sp|Q8BMA6|SRP68_MOUSE	0.119149	0.462351	1
sp|Q99KR3|LACB2_MOUSE	0.120576	0.462858	1
sp|O55137|ACOT1_MOUSE;sp|Q9QYR7|ACOT3_MOUSE	0.123344	0.468444	1
sp|P34914|HYES_MOUSE	0.126939	0.469087	1
sp|Q8BFR5|EFTU_MOUSE	0.1284	0.469087	1
sp|Q8K157|GALM_MOUSE	0.130765	0.469087	1
sp|Q91XE0|GLYAT_MOUSE	0.131397	0.469087	1
sp|Q9CPY7|AMPL_MOUSE	0.125716	0.469087	1
sp|Q9EQ20|MMSA_MOUSE	0.12978	0.469087	1
sp|Q9ET01|PYGL_MOUSE;sp|Q9WUB3|PYGM_MOUSE;sp|Q8CI94|PYGB_MOUSE	0.133039	0.470246	1
sp|O35215|DOPD_MOUSE	0.144797	0.47397	1
sp|P05064|ALDOA_MOUSE;tr|A6ZI47|A6ZI47_MOUSE;tr|A6ZI46|A6ZI46_MOUSE;sp|P05063|ALDOC_MOUSE	0.15054	0.47397	1
sp|P10518|HEM2_MOUSE	0.155835	0.47397	1
sp|P11679|K2C8_MOUSE	0.145765	0.47397	1
sp|P14069|S10A6_MOUSE	0.138083	0.47397	1
sp|P17182|ENOA_MOUSE;sp|P17183|ENOG_MOUSE	0.156549	0.47397	1
sp|P28271|ACOC_MOUSE	0.156662	0.47397	1
sp|P47738|ALDH2_MOUSE	0.148956	0.47397	1
sp|P48036|ANXA5_MOUSE	0.146725	0.47397	1
sp|P61922|GABT_MOUSE	0.149261	0.47397	1
sp|Q60864|STIP1_MOUSE	0.153066	0.47397	1
sp|Q64105|SPRE_MOUSE	0.155007	0.47397	1
sp|Q78JT3|3HAO_MOUSE	0.148011	0.47397	1
sp|Q91WK2|EIF3H_MOUSE	0.135817	0.47397	1
sp|Q9CXF0|KYNU_MOUSE	0.152536	0.47397	1
sp|Q9DBT9|M2GD_MOUSE	0.139793	0.47397	1
sp|Q9EST5|AN32B_MOUSE	0.14298	0.47397	1
sp|P14211|CALR_MOUSE	0.162226	0.486677	1
sp|P17751|TPIS_MOUSE	0.170197	0.491101	1
sp|P35492|HUTH_MOUSE	0.166743	0.491101	1
sp|P54869|HMCS2_MOUSE;sp|Q8JZK9|HMCS1_MOUSE	0.171954	0.491101	1
sp|Q8QZR5|ALAT1_MOUSE	0.171137	0.491101	1
sp|Q9R0P5|DEST_MOUSE	0.17108	0.491101	1
sp|Q9WUU7|CATZ_MOUSE	0.166849	0.491101	1
sp|P07309|TTHY_MOUSE	0.179643	0.500415	1
sp|P16460|ASSY_MOUSE	0.189232	0.500415	1
sp|P40142|TKT_MOUSE	0.188931	0.500415	1
sp|P97494|GSH1_MOUSE	0.178328	0.500415	1
sp|Q62348|TSN_MOUSE	0.182281	0.500415	1
sp|Q8CDN6|TXNL1_MOUSE	0.184186	0.500415	1
sp|Q99JY9|ARP3_MOUSE	0.182103	0.500415	1
sp|Q99LC5|ETFA_MOUSE	0.186647	0.500415	1
sp|Q9JM76|ARPC3_MOUSE	0.184422	0.500415	1
tr|Q9JLI0|Q9JLI0_MOUSE	0.185103	0.500415	1
sp|P61161|ARP2_MOUSE	0.195741	0.50273	1
sp|P62192|PRS4_MOUSE	0.195315	0.50273	1
sp|Q60866|PTER_MOUSE	0.193582	0.50273	1
sp|Q64374|RGN_MOUSE	0.195008	0.50273	1
sp|Q8VCR7|ABHEB_MOUSE	0.197961	0.5048	1
sp|Q8CG76|ARK72_MOUSE	0.19979	0.505851	1
sp|P97371|PSME1_MOUSE	0.204251	0.509914	1
sp|Q8R2U6|NUDT4_MOUSE	0.203914	0.509914	1
sp|P06151|LDHA_MOUSE;sp|P00342|LDHC_MOUSE;sp|P16125|LDHB_MOUSE	0.208547	0.515569	1
sp|P16858|G3P_MOUSE;tr|A0A1D5RLD8|A0A1D5RLD8_MOUSE;tr|S4R1W1|S4R1W1_MOUSE;tr|V9GX06|V9GX06_MOUSE;sp|Q64467|G3PT_MOUSE;tr|V9GXK0|V9GXK0_MOUSE	0.210849	0.515569	1
sp|Q8BGQ7|SYAC_MOUSE	0.209957	0.515569	1
sp|O08807|PRDX4_MOUSE	0.215138	0.516887	1
sp|Q8BMS1|ECHA_MOUSE	0.215731	0.516887	1
sp|Q8CHT0|AL4A1_MOUSE	0.213142	0.516887	1
sp|P11725|OTC_MOUSE	0.229702	0.529476	1
sp|P52196|THTR_MOUSE	0.2267	0.529476	1
sp|Q8BWF0|SSDH_MOUSE	0.229885	0.529476	1
sp|Q9CWS0|DDAH1_MOUSE	0.225886	0.529476	1
sp|Q9R0H0|ACOX1_MOUSE	0.223193	0.529476	1
tr|Q8BGL3|Q8BGL3_MOUSE;tr|L7N245|L7N245_MOUSE;tr|K7N6K9|K7N6K9_MOUSE;sp|P52843|ST2A1_MOUSE;sp|P50236|ST2A2_MOUSE	0.227912	0.529476	1
sp|P32020|NLTP_MOUSE	0.246024	0.542164	1
sp|P60843|IF4A1_MOUSE	0.245951	0.542164	1
sp|Q8CAY6|THIC_MOUSE	0.245998	0.542164	1
sp|Q91VI7|RINI_MOUSE	0.239186	0.542164	1
sp|Q922B2|SYDC_MOUSE	0.239861	0.542164	1
sp|Q9R0P3|ESTD_MOUSE	0.244812	0.542164	1
sp|Q9Z2I8|SUCB2_MOUSE	0.240032	0.542164	1
sp|P99029|PRDX5_MOUSE	0.251591	0.55103	1
sp|P68373|TBA1C_MOUSE;sp|P68369|TBA1A_MOUSE;sp|P05213|TBA1B_MOUSE;sp|P05214|TBA3_MOUSE;tr|A0A2R8VHF3|A0A2R8VHF3_MOUSE;sp|Q9JJZ2|TBA8_MOUSE;sp|Q3UX10|TBAL3_MOUSE	0.266928	0.561565	1
sp|Q8R0F9|S14L4_MOUSE	0.265036	0.561565	1
sp|Q99K51|PLST_MOUSE	0.266421	0.561565	1
sp|Q9CQM9|GLRX3_MOUSE	0.268985	0.561565	1
sp|Q9D0M1|KPRA_MOUSE	0.261601	0.561565	1
sp|Q9DCS2|MTL26_MOUSE	0.265748	0.561565	1
sp|Q9JM62|REEP6_MOUSE	0.267501	0.561565	1
sp|Q9QZ85|IIGP1_MOUSE	0.264839	0.561565	1
sp|A2AJL3|FGGY_MOUSE	0.275025	0.56968	1
sp|P47199|QOR_MOUSE	0.288829	0.56968	1
sp|Q03249|GALT_MOUSE	0.286463	0.56968	1
sp|Q61171|PRDX2_MOUSE	0.279105	0.56968	1
sp|Q64516|GLPK_MOUSE;tr|Q8C635|Q8C635_MOUSE	0.280523	0.56968	1
sp|Q80X90|FLNB_MOUSE	0.287489	0.56968	1
sp|Q99KI0|ACON_MOUSE	0.288135	0.56968	1
sp|Q9DBF1|AL7A1_MOUSE	0.284195	0.56968	1
sp|Q9Z0S1|BPNT1_MOUSE	0.277802	0.56968	1
tr|Q792Z1|Q792Z1_MOUSE	0.281854	0.56968	1
sp|P07901|HS90A_MOUSE	0.294437	0.577549	1
sp|P18760|COF1_MOUSE;sp|P45591|COF2_MOUSE	0.299173	0.583632	1
sp|P80314|TCPB_MOUSE	0.309328	0.592055	1
sp|Q6ZWX6|IF2A_MOUSE	0.311782	0.592055	1
sp|Q9CQ62|DECR_MOUSE	0.311077	0.592055	1
sp|Q9CYR6|AGM1_MOUSE	0.306644	0.592055	1
sp|Q9JII5|DAZP1_MOUSE	0.306836	0.592055	1
sp|P68368|TBA4A_MOUSE	0.317003	0.598784	1
sp|O35423|SPYA_MOUSE	0.324947	0.605694	1
sp|P63101|1433Z_MOUSE	0.325752	0.605694	1
sp|Q91XD4|FTCD_MOUSE	0.324701	0.605694	1
sp|O55125|NIPS1_MOUSE	0.327646	0.60606	1
sp|P61979|HNRPK_MOUSE	0.334748	0.612092	1
sp|P63242|IF5A1_MOUSE;sp|Q8BGY2|IF5A2_MOUSE	0.333641	0.612092	1
sp|Q9QUR6|PPCE_MOUSE	0.33605	0.612092	1
sp|O35381|AN32A_MOUSE	0.34398	0.620919	1
sp|Q8BP47|SYNC_MOUSE	0.344375	0.620919	1
sp|P53657|KPYR_MOUSE	0.348643	0.625137	1
sp|Q9DBA8|HUTI_MOUSE	0.350217	0.625137	1
sp|O35490|BHMT1_MOUSE;sp|Q91WS4|BHMT2_MOUSE	0.353468	0.625814	1
sp|P25688|URIC_MOUSE	0.365029	0.625814	1
sp|Q8BFZ3|ACTBL_MOUSE	0.35758	0.625814	1
sp|Q8R050|ERF3A_MOUSE;sp|Q149F3|ERF3B_MOUSE	0.36403	0.625814	1
sp|Q91VA0|ACSM1_MOUSE	0.365471	0.625814	1
sp|Q93092|TALDO_MOUSE	0.366734	0.625814	1
sp|Q9D8W5|PSD12_MOUSE	0.368118	0.625814	1
sp|Q9QXD6|F16P1_MOUSE;sp|P70695|F16P2_MOUSE	0.360444	0.625814	1
tr|A8DUK4|A8DUK4_MOUSE;sp|P02088|HBB1_MOUSE;sp|P02089|HBB2_MOUSE;CON__Q3SX09;CON__P02070;sp|P02104|HBE_MOUSE	0.360157	0.625814	1
tr|Q80X81|Q80X81_MOUSE	0.368126	0.625814	1
sp|Q61425|HCDH_MOUSE	0.371657	0.628822	1
tr|E9Q6L7|E9Q6L7_MOUSE	0.373437	0.628854	1
sp|Q99LX0|PARK7_MOUSE	0.3794	0.634081	1
sp|Q9Z2I9|SUCB1_MOUSE	0.380093	0.634081	1
tr|Q14AA6|Q14AA6_MOUSE;sp|P62827|RAN_MOUSE	0.382292	0.634782	1
sp|P27773|PDIA3_MOUSE	0.388983	0.636038	1
sp|Q8BVI4|DHPR_MOUSE	0.387998	0.636038	1
sp|Q8VC30|TKFC_MOUSE	0.391866	0.636038	1
sp|Q99PL5|RRBP1_MOUSE	0.393738	0.636038	1
sp|Q9CWJ9|PUR9_MOUSE	0.392917	0.636038	1
sp|Q9JLJ2|AL9A1_MOUSE	0.38954	0.636038	1
sp|P70697|DCUP_MOUSE	0.401699	0.644615	1
sp|Q9CQE1|NPS3B_MOUSE	0.402659	0.644615	1
sp|P42125|ECI1_MOUSE	0.411102	0.652303	1
sp|P97807|FUMH_MOUSE	0.414336	0.652303	1
sp|Q8VCN5|CGL_MOUSE	0.416597	0.652303	1
sp|Q99J08|S14L2_MOUSE;tr|Q5SQ27|Q5SQ27_MOUSE	0.412551	0.652303	1
sp|Q9JII6|AK1A1_MOUSE	0.41532	0.652303	1
sp|P61294|RAB6B_MOUSE;sp|P35279|RAB6A_MOUSE;sp|Q8BHD0|RB39A_MOUSE	0.422052	0.656043	1
sp|Q9JI75|NQO2_MOUSE	0.422661	0.656043	1
sp|P57780|ACTN4_MOUSE;sp|Q7TPR4|ACTN1_MOUSE;sp|O88990|ACTN3_MOUSE;sp|Q9JI91|ACTN2_MOUSE	0.425141	0.657036	1
sp|Q91Z53|GRHPR_MOUSE	0.427851	0.658374	1
sp|P24270|CATA_MOUSE	0.429907	0.658698	1
sp|P08113|ENPL_MOUSE	0.436975	0.666506	1
sp|P52480|KPYM_MOUSE	0.438736	0.666506	1
sp|Q01853|TERA_MOUSE	0.441147	0.667328	1
sp|Q9DCD0|6PGD_MOUSE	0.443914	0.668681	1
sp|P19096|FAS_MOUSE	0.448604	0.672906	1
sp|O88533|DDC_MOUSE	0.454158	0.67575	1
sp|P10126|EF1A1_MOUSE;sp|P62631|EF1A2_MOUSE	0.457659	0.67575	1
sp|P68254|1433T_MOUSE	0.459965	0.67575	1
sp|P85094|ISC2A_MOUSE	0.45889	0.67575	1
sp|Q9DBM2|ECHP_MOUSE	0.456807	0.67575	1
sp|Q62095|DDX3Y_MOUSE;sp|P16381|DDX3L_MOUSE;sp|Q62167|DDX3X_MOUSE	0.466004	0.681818	1
sp|Q9QXF8|GNMT_MOUSE	0.468884	0.683231	1
sp|P61458|PHS_MOUSE	0.474244	0.687972	1
sp|Q99JY0|ECHB_MOUSE	0.475992	0.687972	1
sp|Q9JMD3|STA10_MOUSE	0.479149	0.689743	1
sp|Q68FD5|CLH1_MOUSE	0.485466	0.694873	1
sp|Q9R1P0|PSA4_MOUSE	0.487587	0.694873	1
tr|A2CEK7|A2CEK7_MOUSE;tr|A9R9W0|A9R9W0_MOUSE;tr|A2BIN1|A2BIN1_MOUSE;sp|P11591|MUP5_MOUSE;sp|P11589|MUP2_MOUSE;sp|P11588|MUP1_MOUSE;sp|P02762|MUP6_MOUSE;sp|B5X0G2|MUP17_MOUSE;tr|Q4FZE8|Q4FZE8_MOUSE;sp|P04938|MUP11_MOUSE;sp|A2BIM8|MUP18_MOUSE;tr|E9PVW0|E9PVW0_MOUSE	0.488552	0.694873	1
sp|O08749|DLDH_MOUSE	0.504007	0.697698	1
sp|O08756|HCD2_MOUSE	0.502533	0.697698	1
sp|P15105|GLNA_MOUSE	0.498396	0.697698	1
sp|P28474|ADHX_MOUSE;sp|Q64437|ADH7_MOUSE	0.504219	0.697698	1
sp|P45952|ACADM_MOUSE	0.496935	0.697698	1
sp|P99026|PSB4_MOUSE	0.498615	0.697698	1
sp|Q9D6Y9|GLGB_MOUSE	0.497074	0.697698	1
sp|P20029|BIP_MOUSE	0.514159	0.702853	1
sp|P40936|INMT_MOUSE	0.511952	0.702853	1
sp|P60710|ACTB_MOUSE;sp|P63260|ACTG_MOUSE;tr|V9GXQ2|V9GXQ2_MOUSE	0.514969	0.702853	1
sp|P63323|RS12_MOUSE	0.515819	0.702853	1
sp|Q60854|SPB6_MOUSE	0.520963	0.707163	1
sp|P50544|ACADV_MOUSE	0.523131	0.707416	1
sp|Q99KB8|GLO2_MOUSE	0.536253	0.722424	1
sp|Q8VC12|HUTU_MOUSE	0.541432	0.726659	1
sp|P23492|PNPH_MOUSE;tr|A0A2I3BQH2|A0A2I3BQH2_MOUSE;tr|Q9D8C9|Q9D8C9_MOUSE	0.548724	0.733687	1
sp|Q9JIF7|COPB_MOUSE	0.551359	0.734459	1
sp|P21981|TGM2_MOUSE	0.558341	0.739259	1
tr|Q9R0T7|Q9R0T7_MOUSE;tr|Q9QUK9|Q9QUK9_MOUSE	0.559103	0.739259	1
sp|P70333|HNRH2_MOUSE;sp|O35737|HNRH1_MOUSE	0.561807	0.740093	1
sp|Q3UV17|K22O_MOUSE	0.570638	0.748962	1
sp|P06801|MAOX_MOUSE	0.590234	0.759707	1
sp|P15532|NDKA_MOUSE;sp|Q01768|NDKB_MOUSE;tr|E9PZF0|E9PZF0_MOUSE	0.588511	0.759707	1
sp|P16015|CAH3_MOUSE	0.594273	0.759707	1
sp|P35505|FAAA_MOUSE	0.595848	0.759707	1
sp|P58252|EF2_MOUSE;sp|O08810|U5S1_MOUSE	0.587767	0.759707	1
sp|P61750|ARF4_MOUSE	0.583039	0.759707	1
sp|P80316|TCPE_MOUSE	0.594027	0.759707	1
tr|G3X9Y6|G3X9Y6_MOUSE	0.59405	0.759707	1
sp|Q91V92|ACLY_MOUSE	0.603287	0.763735	1
sp|Q99LB7|SARDH_MOUSE	0.60183	0.763735	1
sp|P38647|GRP75_MOUSE	0.61248	0.769914	1
sp|Q9QYG0|NDRG2_MOUSE	0.612122	0.769914	1
sp|P63158|HMGB1_MOUSE;sp|P30681|HMGB2_MOUSE	0.621169	0.772673	1
sp|P80317|TCPZ_MOUSE	0.619986	0.772673	1
sp|Q8VCA8|SCRN2_MOUSE	0.620581	0.772673	1
sp|Q9CZL5|PHS2_MOUSE	0.623562	0.772957	1
sp|G3X982|AOXC_MOUSE;sp|O54754|AOXA_MOUSE	0.644546	0.796204	1
sp|O88587|COMT_MOUSE	0.650415	0.797932	1
sp|Q61233|PLSL_MOUSE	0.649978	0.797932	1
sp|Q63836|SBP2_MOUSE	0.655362	0.798512	1
sp|Q91X44|GCKR_MOUSE	0.654155	0.798512	1
sp|P47754|CAZA2_MOUSE	0.657876	0.798849	1
sp|P26041|MOES_MOUSE;sp|P26043|RADI_MOUSE;sp|P26040|EZRI_MOUSE	0.667048	0.804514	1
sp|Q9QXE0|HACL1_MOUSE;tr|E9Q9L4|E9Q9L4_MOUSE	0.666614	0.804514	1
sp|Q02053|UBA1_MOUSE;sp|P31254|UBA1Y_MOUSE	0.670912	0.80645	1
sp|Q9CZS1|AL1B1_MOUSE;sp|Q62148|AL1A2_MOUSE;sp|Q9JHW9|AL1A3_MOUSE	0.676122	0.809985	1
sp|P05202|AATM_MOUSE	0.679384	0.811171	1
sp|P16331|PH4H_MOUSE	0.682498	0.812172	1
sp|O55060|TPMT_MOUSE	0.698947	0.823512	1
sp|P14152|MDHC_MOUSE	0.696444	0.823512	1
sp|P84084|ARF5_MOUSE	0.69858	0.823512	1
sp|O70251|EF1B_MOUSE	0.704494	0.824143	1
sp|O70475|UGDH_MOUSE	0.702654	0.824143	1
sp|Q9D0F9|PGM1_MOUSE	0.708447	0.824143	1
sp|Q9WTP6|KAD2_MOUSE	0.708716	0.824143	1
sp|Q91X52|DCXR_MOUSE	0.713064	0.826506	1
tr|Q91WT7|Q91WT7_MOUSE	0.719256	0.830985	1
sp|P08249|MDHM_MOUSE	0.72706	0.837292	1
sp|Q9JHI5|IVD_MOUSE	0.735655	0.844466	1
sp|Q9DBE0|CSAD_MOUSE	0.744562	0.849229	1
sp|Q9JMH6|TRXR1_MOUSE	0.74299	0.849229	1
sp|P51174|ACADL_MOUSE	0.747968	0.850397	1
sp|P07759|SPA3K_MOUSE;sp|Q03734|SPA3M_MOUSE;sp|P29621|SPA3C_MOUSE;sp|Q91WP6|SPA3N_MOUSE;sp|Q5I2A0|SPA3G_MOUSE	0.760165	0.861349	1
sp|Q8QZT1|THIL_MOUSE	0.764375	0.861349	1
sp|Q9D6R2|IDH3A_MOUSE	0.76484	0.861349	1
sp|P57776|EF1D_MOUSE	0.77379	0.86326	1
sp|Q61598|GDIB_MOUSE;sp|P50396|GDIA_MOUSE	0.773485	0.86326	1
sp|Q9ET30|TM9S3_MOUSE	0.771496	0.86326	1
sp|Q71RI9|KAT3_MOUSE	0.778189	0.865462	1
sp|P52760|RIDA_MOUSE	0.784655	0.869261	1
sp|Q99K67|AASS_MOUSE	0.786474	0.869261	1
sp|Q5XJY5|COPD_MOUSE	0.79228	0.870289	1
sp|Q8BGT5|ALAT2_MOUSE	0.792108	0.870289	1
sp|Q9D6Y7|MSRA_MOUSE	0.794861	0.870446	1
sp|Q9CZN7|GLYM_MOUSE	0.800974	0.874458	1
sp|P17742|PPIA_MOUSE;tr|F8VPN3|F8VPN3_MOUSE;tr|V9GX31|V9GX31_MOUSE	0.807424	0.87664	1
sp|P55264|ADK_MOUSE	0.807884	0.87664	1
sp|Q9DB29|IAH1_MOUSE	0.819904	0.886987	1
sp|Q91X83|METK1_MOUSE;sp|Q3THS6|METK2_MOUSE	0.829669	0.89484	1
sp|O09173|HGD_MOUSE	0.834042	0.896847	1
sp|P42932|TCPQ_MOUSE	0.838725	0.899174	1
sp|P01942|HBA_MOUSE	0.843015	0.901067	1
sp|P26443|DHE3_MOUSE	0.868262	0.922529	1
sp|Q9DBP5|KCY_MOUSE	0.867612	0.922529	1
sp|P59999|ARPC4_MOUSE	0.881163	0.930696	1
sp|Q9EQH3|VPS35_MOUSE	0.88025	0.930696	1
sp|Q8BWP5|TTPA_MOUSE	0.888977	0.936179	1
sp|P10639|THIO_MOUSE	0.898094	0.942999	1
sp|A3KMP2|TTC38_MOUSE	0.919205	0.945796	1
sp|O70456|1433S_MOUSE	0.910204	0.945796	1
sp|P35700|PRDX1_MOUSE	0.905607	0.945796	1
sp|Q3U1J4|DDB1_MOUSE	0.921953	0.945796	1
sp|Q8VCT4|CES1D_MOUSE;sp|P23953|EST1C_MOUSE;tr|E9PYP1|E9PYP1_MOUSE;tr|D3Z5G7|D3Z5G7_MOUSE	0.913974	0.945796	1
sp|Q9DCG6|PBLD1_MOUSE	0.919333	0.945796	1
sp|Q9Z1Q9|SYVC_MOUSE	0.912324	0.945796	1
sp|Q9Z2V4|PCKGC_MOUSE	0.919616	0.945796	1
sp|O88844|IDHC_MOUSE	0.931653	0.950147	1
sp|P05201|AATC_MOUSE	0.937487	0.950147	1
sp|P13707|GPDA_MOUSE;sp|Q3ULJ0|GPD1L_MOUSE	0.941877	0.950147	1
sp|P50247|SAHH_MOUSE	0.931135	0.950147	1
sp|Q8VBT2|SDHL_MOUSE	0.934788	0.950147	1
sp|Q9CZU6|CISY_MOUSE;tr|Q80X68|Q80X68_MOUSE	0.942162	0.950147	1
sp|Q571F8|GLSL_MOUSE	0.959771	0.965178	1
sp|P61982|1433G_MOUSE	0.965776	0.968489	1
sp|P50431|GLYC_MOUSE	0.997641	0.997641	1

## Sheet: GST_MSqRob
Protein	p-value	q-value (BH)	q-value (BY)
sp|Q05920|PYC_MOUSE	2.73628e-18	8.37991e-16	5.63696e-15
sp|Q9D8N0|EF1G_MOUSE	3.58116e-18	8.37991e-16	5.63696e-15
sp|P30115|GSTA3_MOUSE	4.42423e-17	6.9018e-15	4.64267e-14
sp|P00329|ADH1_MOUSE	3.09432e-13	3.62036e-11	2.43533e-10
sp|P24549|AL1A1_MOUSE	3.31847e-12	3.10608e-10	2.08939e-09
sp|Q99MN9|PCCB_MOUSE	1.57071e-10	1.22516e-08	8.24132e-08
sp|Q9CPU0|LGUL_MOUSE	3.08514e-09	2.06263e-07	1.38748e-06
sp|P19157|GSTP1_MOUSE	1.46002e-08	8.54112e-07	5.7454e-06
sp|Q5SWU9|ACACA_MOUSE	6.9582e-08	3.61826e-06	2.43392e-05
sp|P10649|GSTM1_MOUSE	1.68249e-07	7.87403e-06	5.29667e-05
sp|Q8BH00|AL8A1_MOUSE	9.54718e-07	4.06189e-05	0.000273233
sp|Q91ZA3|PCCA_MOUSE	1.95721e-06	7.63313e-05	0.000513462
sp|Q02257|PLAK_MOUSE	3.35357e-06	0.000120729	0.000812112
sp|Q99MR8|MCCA_MOUSE	2.68196e-05	0.000896541	0.00603081
sp|P15626|GSTM2_MOUSE	3.18439e-05	0.00099353	0.00668323
sp|P49429|HPPD_MOUSE	0.000298703	0.00873707	0.0587721
sp|Q91YI0|ARLY_MOUSE	0.000556421	0.0153179	0.10304
sp|Q60692|PSB6_MOUSE	0.000655213	0.016859	0.113406
sp|P31786|ACBP_MOUSE	0.000684447	0.016859	0.113406
sp|Q8R4N0|CLYBL_MOUSE	0.000849342	0.0198746	0.133692
sp|Q921C5|BICD2_MOUSE	0.00106725	0.0237844	0.159991
sp|O08709|PRDX6_MOUSE	0.00116485	0.0247796	0.166686
sp|Q64471|GSTT1_MOUSE	0.00131317	0.0267202	0.17974
sp|P70349|HINT1_MOUSE	0.00152777	0.0297915	0.2004
sp|P45377|ALD2_MOUSE	0.00266103	0.0498144	0.335089
sp|O35945|AL1A7_MOUSE	0.00304377	0.0547879	0.368545
sp|Q99L20|GSTT3_MOUSE	0.00334313	0.0579476	0.389799
tr|A0A0A6YW67|A0A0A6YW67_MOUSE;sp|P62984|RL40_MOUSE;sp|P62983|RS27A_MOUSE;sp|P0CG49|UBB_MOUSE;sp|P0CG50|UBC_MOUSE	0.00448822	0.0750174	0.504624
sp|P12710|FABPL_MOUSE	0.00593	0.0956979	0.643736
sp|Q63880|EST3A_MOUSE	0.00764282	0.119228	0.802017
sp|Q80XD1|CHIO_MOUSE	0.010839	0.16181	1
sp|P14824|ANXA6_MOUSE	0.0114023	0.16181	1
sp|Q80W21|GSTM7_MOUSE	0.0114097	0.16181	1
sp|O70435|PSA3_MOUSE	0.0144034	0.198259	1
sp|Q8BT60|CPNE3_MOUSE	0.017109	0.224775	1
sp|Q64727|VINC_MOUSE	0.0172904	0.224775	1
sp|P47738|ALDH2_MOUSE	0.0182318	0.230608	1
sp|Q9JHW2|NIT2_MOUSE	0.0201915	0.248675	1
sp|P28271|ACOC_MOUSE	0.0222229	0.266675	1
sp|Q9WVL0|MAAI_MOUSE	0.0230192	0.269324	1
sp|O08529|CAN2_MOUSE	0.0244371	0.278941	1
sp|Q8BGC4|PTGR3_MOUSE	0.025215	0.280968	1
sp|P61161|ARP2_MOUSE	0.0275096	0.299407	1
sp|Q03145|EPHA2_MOUSE	0.0299546	0.312338	1
sp|P24472|GSTA4_MOUSE	0.0300325	0.312338	1
sp|P70168|IMB1_MOUSE	0.034604	0.352058	1
sp|P99029|PRDX5_MOUSE	0.0366701	0.363344	1
sp|P70694|DHB5_MOUSE	0.0372661	0.363344	1
sp|P11352|GPX1_MOUSE	0.0409908	0.391504	1
sp|Q922M7|ASHWN_MOUSE	0.0427718	0.394709	1
sp|Q8CDN6|TXNL1_MOUSE	0.0430132	0.394709	1
sp|P62192|PRS4_MOUSE	0.0441266	0.397139	1
sp|Q60759|GCDH_MOUSE	0.049308	0.426631	1
sp|Q03265|ATPA_MOUSE	0.0493297	0.426631	1
sp|Q61176|ARGI1_MOUSE	0.0501382	0.426631	1
sp|Q9JK84|PAR6G_MOUSE	0.0540873	0.451828	1
sp|P06745|G6PI_MOUSE	0.0550303	0.451828	1
sp|Q9EST5|AN32B_MOUSE	0.0581827	0.466847	1
sp|Q64442|DHSO_MOUSE	0.0594719	0.466847	1
sp|P07309|TTHY_MOUSE	0.0598522	0.466847	1
sp|P60843|IF4A1_MOUSE	0.0652859	0.500882	1
sp|Q9CR26|VTA1_MOUSE	0.0681643	0.51047	1
sp|P60766|CDC42_MOUSE	0.0687172	0.51047	1
sp|P11983|TCPA_MOUSE	0.0703909	0.514733	1
sp|Q91Y97|ALDOB_MOUSE	0.0748416	0.538859	1
sp|Q99K51|PLST_MOUSE	0.0771594	0.541539	1
sp|Q99LC5|ETFA_MOUSE	0.077528	0.541539	1
sp|Q8K183|PDXK_MOUSE	0.0826751	0.56369	1
sp|O55137|ACOT1_MOUSE	0.0843733	0.56369	1
sp|Q02053|UBA1_MOUSE	0.0847708	0.56369	1
sp|Q923D2|BLVRB_MOUSE	0.085517	0.56369	1
sp|P00920|CAH2_MOUSE	0.0903216	0.58709	1
sp|P27005|S10A8_MOUSE	0.0926444	0.59394	1
sp|Q6ZWX6|IF2A_MOUSE	0.103258	0.645325	1
sp|Q8BFR5|EFTU_MOUSE	0.104655	0.645325	1
tr|E9Q035|E9Q035_MOUSE;sp|P47758|SRPRB_MOUSE	0.104796	0.645325	1
tr|Q9Z1R9|Q9Z1R9_MOUSE	0.108237	0.652467	1
sp|Q8BGQ7|SYAC_MOUSE	0.108744	0.652467	1
sp|Q8CG76|ARK72_MOUSE	0.119328	0.706905	1
sp|Q07417|ACADS_MOUSE	0.122611	0.710569	1
sp|Q99JY9|ARP3_MOUSE	0.122983	0.710569	1
sp|Q9QUM9|PSA6_MOUSE	0.125951	0.711995	1
sp|Q60864|STIP1_MOUSE	0.128048	0.711995	1
sp|Q9DCM2|GSTK1_MOUSE	0.128887	0.711995	1
sp|Q78PY7|SND1_MOUSE	0.13048	0.711995	1
sp|P35492|HUTH_MOUSE	0.132313	0.711995	1
sp|O09174|AMACR_MOUSE	0.132358	0.711995	1
sp|P48758|CBR1_MOUSE	0.136364	0.725207	1
sp|Q99KK7|DPP3_MOUSE	0.145166	0.763346	1
sp|Q9QYB1|CLIC4_MOUSE	0.147276	0.765834	1
sp|P63028|TCTP_MOUSE	0.151686	0.780097	1
sp|P70296|PEBP1_MOUSE	0.157517	0.80128	1
sp|P21300|ALD1_MOUSE	0.169573	0.845018	1
sp|Q91XD4|FTCD_MOUSE	0.169726	0.845018	1
sp|P63242|IF5A1_MOUSE	0.174316	0.858735	1
sp|A2AJL3|FGGY_MOUSE	0.18045	0.879693	1
sp|Q11011|PSA_MOUSE	0.182454	0.880292	1
sp|Q920E5|FPPS_MOUSE	0.184908	0.883032	1
sp|P40142|TKT_MOUSE	0.189087	0.893865	1
sp|Q9QXD6|F16P1_MOUSE	0.191243	0.894636	1
sp|Q9DBT9|M2GD_MOUSE	0.193073	0.894636	1
sp|Q9EPQ7|STAR5_MOUSE	0.204978	0.940487	1
sp|P68368|TBA4A_MOUSE	0.209482	0.945794	1
sp|P46471|PRS7_MOUSE	0.211959	0.945794	1
sp|Q8R0F8|FAHD1_MOUSE	0.212197	0.945794	1
sp|Q8R2U6|NUDT4_MOUSE	0.219962	0.96903	1
sp|Q62348|TSN_MOUSE	0.222781	0.96903	1
sp|Q9QXF8|GNMT_MOUSE	0.224836	0.96903	1
sp|Q9WUU7|CATZ_MOUSE	0.225693	0.96903	1
sp|Q03249|GALT_MOUSE	0.237311	1	1
sp|P14152|MDHC_MOUSE	0.238603	1	1
sp|P80314|TCPB_MOUSE	0.243327	1	1
sp|Q9R0P5|DEST_MOUSE	0.247417	1	1
sp|Q99KR3|LACB2_MOUSE	0.260008	1	1
sp|Q9D0F9|PGM1_MOUSE	0.264062	1	1
tr|Q8BGL3|Q8BGL3_MOUSE	0.266588	1	1
sp|Q60710|SAMH1_MOUSE	0.268717	1	1
sp|Q9WU84|CCS_MOUSE	0.272422	1	1
sp|Q64105|SPRE_MOUSE	0.280504	1	1
sp|Q9CZY3|UB2V1_MOUSE	0.290007	1	1
sp|Q9EQ20|MMSA_MOUSE	0.293426	1	1
sp|Q9WUK4|RFC2_MOUSE	0.296504	1	1
sp|Q9QXG4|ACSA_MOUSE	0.301468	1	1
sp|Q80W22|THNS2_MOUSE	0.301619	1	1
sp|Q9JMD3|STA10_MOUSE	0.303832	1	1
sp|Q9CQ60|6PGL_MOUSE	0.304773	1	1
sp|Q91XE4|ACY3_MOUSE	0.306617	1	1
sp|P47757|CAPZB_MOUSE	0.312131	1	1
sp|P38060|HMGCL_MOUSE	0.322317	1	1
sp|P52196|THTR_MOUSE	0.328039	1	1
sp|O35660|GSTM6_MOUSE	0.331401	1	1
sp|Q8VC12|HUTU_MOUSE	0.336099	1	1
sp|P19639|GSTM3_MOUSE	0.336834	1	1
sp|P07724|ALBU_MOUSE	0.342178	1	1
sp|P26638|SYSC_MOUSE	0.343853	1	1
sp|P08228|SODC_MOUSE	0.353249	1	1
sp|P62814|VATB2_MOUSE	0.353486	1	1
sp|Q9R0P3|ESTD_MOUSE	0.353504	1	1
sp|Q8CAY6|THIC_MOUSE	0.360385	1	1
sp|Q8BP47|SYNC_MOUSE	0.365429	1	1
sp|P97371|PSME1_MOUSE	0.384486	1	1
sp|Q61133|GSTT2_MOUSE	0.3894	1	1
sp|P16858|G3P_MOUSE;tr|A0A1D5RLD8|A0A1D5RLD8_MOUSE	0.394986	1	1
sp|P00375|DYR_MOUSE	0.42631	1	1
sp|Q8VCR7|ABHEB_MOUSE	0.467787	1	1
sp|Q9D0M1|KPRA_MOUSE	0.471069	1	1
sp|P61458|PHS_MOUSE	0.475473	1	1
sp|P42125|ECI1_MOUSE	0.476402	1	1
sp|Q9R1P0|PSA4_MOUSE	0.482961	1	1
sp|O55135|IF6_MOUSE	0.509213	1	1
sp|Q8BWF0|SSDH_MOUSE	0.514746	1	1
sp|P13745|GSTA1_MOUSE;tr|Q6P8Q0|Q6P8Q0_MOUSE	0.516036	1	1
sp|O35215|DOPD_MOUSE	0.518871	1	1
sp|Q8BMS1|ECHA_MOUSE	0.522843	1	1
sp|Q91WU0|CES1F_MOUSE	0.523848	1	1
sp|P18760|COF1_MOUSE	0.525297	1	1
sp|P06151|LDHA_MOUSE	0.533081	1	1
sp|Q99PT1|GDIR1_MOUSE	0.54168	1	1
sp|P80316|TCPE_MOUSE	0.542036	1	1
sp|P09103|PDIA1_MOUSE	0.564531	1	1
sp|Q8BFZ3|ACTBL_MOUSE	0.571179	1	1
sp|P61922|GABT_MOUSE	0.578786	1	1
sp|P60335|PCBP1_MOUSE	0.579357	1	1
sp|Q99JI6|RAP1B_MOUSE;sp|P62835|RAP1A_MOUSE	0.584174	1	1
sp|Q9D1A2|CNDP2_MOUSE	0.602859	1	1
sp|Q9QUR6|PPCE_MOUSE	0.62826	1	1
sp|P52792|HXK4_MOUSE	0.633404	1	1
sp|Q60866|PTER_MOUSE	0.637151	1	1
sp|O88533|DDC_MOUSE	0.640735	1	1
sp|Q924Y0|BODG_MOUSE	0.644756	1	1
sp|Q91V76|CK054_MOUSE	0.668192	1	1
sp|Q9CWJ9|PUR9_MOUSE	0.672888	1	1
sp|Q9WUM5|SUCA_MOUSE	0.677056	1	1
sp|Q8BVI4|DHPR_MOUSE	0.680596	1	1
tr|E9Q035|E9Q035_MOUSE;sp|Q921I1|TRFE_MOUSE	0.687304	1	1
sp|Q61081|CDC37_MOUSE	0.699753	1	1
sp|Q9JKW0|AR6P1_MOUSE	0.7118	1	1
sp|Q8CHT0|AL4A1_MOUSE	0.72281	1	1
sp|P11679|K2C8_MOUSE	0.728998	1	1
tr|G3X9Y6|G3X9Y6_MOUSE	0.732492	1	1
sp|Q62426|CYTB_MOUSE	0.734039	1	1
sp|Q61699|HS105_MOUSE	0.757348	1	1
sp|P59999|ARPC4_MOUSE	0.777344	1	1
sp|Q8BTZ7|GMPPB_MOUSE	0.825561	1	1
sp|P52825|CPT2_MOUSE	0.847594	1	1
sp|Q99LX0|PARK7_MOUSE	0.850045	1	1
sp|P35585|AP1M1_MOUSE	0.85535	1	1
sp|O55029|COPB2_MOUSE	0.857501	1	1
sp|Q91VI7|RINI_MOUSE	0.858445	1	1
sp|Q00623|APOA1_MOUSE	0.865847	1	1
sp|P57776|EF1D_MOUSE	0.869457	1	1
sp|Q80X90|FLNB_MOUSE	0.885454	1	1
sp|Q9CWF2|TBB2B_MOUSE;sp|Q7TMM9|TBB2A_MOUSE	0.919599	1	1
sp|Q9CQM5|TXD17_MOUSE	0.932747	1	1
sp|Q91V64|ISOC1_MOUSE	0.933907	1	1
sp|Q9CQM9|GLRX3_MOUSE	0.937976	1	1
sp|Q8BWY3|ERF1_MOUSE	0.938383	1	1
sp|Q8VCX1|AK1D1_MOUSE	0.94898	1	1
sp|P50543|S10AB_MOUSE	0.962534	1	1
sp|Q922R8|PDIA6_MOUSE	0.966857	1	1
tr|Q9JLI0|Q9JLI0_MOUSE	0.974646	1	1
sp|Q99LB2|DHRS4_MOUSE	0.993106	1	1
sp|Q8VCR2|DHB13_MOUSE	0.995917	1	1
sp|P14069|S10A6_MOUSE	0.998614	1	1
sp|Q9R0H0|ACOX1_MOUSE	0.998938	1	1
sp|Q9Z2I8|SUCB2_MOUSE	0.999162	1	1
sp|Q9EQF5|DPYS_MOUSE	0.999508	1	1
sp|P63038|CH60_MOUSE	0.999723	1	1
sp|Q9D6Y9|GLGB_MOUSE	0.999816	1	1
sp|Q8BWT1|THIM_MOUSE	0.999854	1	1
sp|Q99KB8|GLO2_MOUSE	0.999903	1	1
sp|Q9D819|IPYR_MOUSE	0.999916	1	1
sp|Q9DCS2|MTL26_MOUSE	0.999932	1	1
sp|Q9Z1Q9|SYVC_MOUSE	0.99997	1	1
sp|Q9Z0S1|BPNT1_MOUSE	0.999971	1	1
sp|Q9JII6|AK1A1_MOUSE	0.999975	1	1
sp|P11725|OTC_MOUSE	0.999976	1	1
sp|Q01853|TERA_MOUSE	0.999981	1	1
sp|Q9DCW4|ETFB_MOUSE	0.999981	1	1
sp|P48036|ANXA5_MOUSE	0.999982	1	1
sp|P54775|PRS6B_MOUSE	0.999984	1	1
sp|Q91X44|GCKR_MOUSE	0.99999	1	1
sp|Q9D8W5|PSD12_MOUSE	0.99999	1	1
sp|Q8VCN5|CGL_MOUSE	0.999991	1	1
sp|P17742|PPIA_MOUSE	0.999992	1	1
sp|P13707|GPDA_MOUSE	0.999993	1	1
sp|P51660|DHB4_MOUSE	0.999993	1	1
sp|P63017|HSP7C_MOUSE	0.999994	1	1
sp|Q91ZJ5|UGPA_MOUSE	0.999994	1	1
sp|Q9ET01|PYGL_MOUSE	0.999996	1	1
sp|Q9DCG6|PBLD1_MOUSE	0.999996	1	1
sp|Q99PL5|RRBP1_MOUSE	0.999997	1	1
sp|Q8VC30|TKFC_MOUSE	0.999997	1	1
sp|Q9JM76|ARPC3_MOUSE	0.999998	1	1
sp|P26443|DHE3_MOUSE	0.999999	1	1
sp|P40936|INMT_MOUSE	0.999999	1	1
sp|P20029|BIP_MOUSE	0.999999	1	1
sp|P97807|FUMH_MOUSE	1	1	1
sp|Q99JY0|ECHB_MOUSE	1	1	1
sp|E9Q557|DESP_MOUSE	1	1	1
sp|O70475|UGDH_MOUSE	1	1	1
sp|O88342|WDR1_MOUSE	1	1	1
sp|Q8QZR5|ALAT1_MOUSE	1	1	1
sp|Q64516|GLPK_MOUSE	1	1	1
sp|Q9DBM2|ECHP_MOUSE	1	1	1
sp|P15105|GLNA_MOUSE	1	1	1
tr|A8DUK4|A8DUK4_MOUSE	1	1	1
sp|P16015|CAH3_MOUSE	1	1	1
sp|P10639|THIO_MOUSE	1	1	1
sp|Q9CPY7|AMPL_MOUSE	1	1	1
sp|Q8C196|CPSM_MOUSE	1	1	1
sp|P42932|TCPQ_MOUSE	1	1	1
sp|Q63836|SBP2_MOUSE	1	1	1
sp|P28474|ADHX_MOUSE	1	1	1
sp|Q91WT9|CBS_MOUSE	1	1	1
sp|P19096|FAS_MOUSE	1	1	1
sp|P50247|SAHH_MOUSE	1	1	1
sp|Q9Z2I9|SUCB1_MOUSE	1	1	1
sp|Q9DBA8|HUTI_MOUSE	1	1	1
sp|O88844|IDHC_MOUSE	1	1	1
sp|Q8QZR3|EST2A_MOUSE	1	1	1
sp|Q8VBT2|SDHL_MOUSE	1	1	1
sp|P68037|UB2L3_MOUSE	1	1	1
sp|Q9DCL9|PUR6_MOUSE	1	1	1
sp|Q9JII5|DAZP1_MOUSE	1	1	1
tr|E9Q6L7|E9Q6L7_MOUSE	1	1	1
sp|P14211|CALR_MOUSE	1	1	1
sp|P61979|HNRPK_MOUSE	1	1	1
sp|Q91XE0|GLYAT_MOUSE	1	1	1
sp|Q3UV17|K22O_MOUSE	1	1	1
sp|O35381|AN32A_MOUSE	1	1	1
sp|P50431|GLYC_MOUSE	1	1	1
sp|Q93092|TALDO_MOUSE	1	1	1
sp|O08756|HCD2_MOUSE	1	1	1
sp|Q9JK38|GNA1_MOUSE	1	1	1
sp|P80313|TCPH_MOUSE	1	1	1
sp|P61750|ARF4_MOUSE	1	1	1
sp|P62259|1433E_MOUSE	1	1	1
sp|Q71RI9|KAT3_MOUSE	1	1	1
sp|P01942|HBA_MOUSE	1	1	1
sp|P61294|RAB6B_MOUSE;sp|P35279|RAB6A_MOUSE;sp|Q8BHD0|RB39A_MOUSE	1	1	1
sp|Q9CQN1|TRAP1_MOUSE	1	1	1
sp|Q8QZS1|HIBCH_MOUSE	1	1	1
sp|P70697|DCUP_MOUSE	1	1	1
sp|P68373|TBA1C_MOUSE;sp|P68369|TBA1A_MOUSE;sp|P05213|TBA1B_MOUSE;sp|P05214|TBA3_MOUSE	1	1	1
sp|P52480|KPYM_MOUSE	1	1	1
sp|P40124|CAP1_MOUSE	1	1	1
sp|Q99J08|S14L2_MOUSE	1	1	1
sp|Q9CZU6|CISY_MOUSE	1	1	1
sp|Q922E4|PCY2_MOUSE	1	1	1
sp|P27773|PDIA3_MOUSE	1	1	1
sp|P63323|RS12_MOUSE	1	1	1
sp|A3KMP2|TTC38_MOUSE	1	1	1
sp|O55060|TPMT_MOUSE	1	1	1
sp|Q9CQV8|1433B_MOUSE	1	1	1
sp|Q9QZ85|IIGP1_MOUSE	1	1	1
sp|P68033|ACTC_MOUSE;sp|P62737|ACTA_MOUSE;sp|P68134|ACTS_MOUSE;sp|P63268|ACTH_MOUSE	1	1	1
sp|P97494|GSH1_MOUSE	1	1	1
sp|P68254|1433T_MOUSE	1	1	1
sp|Q922B2|SYDC_MOUSE	1	1	1
sp|Q3U1J4|DDB1_MOUSE	1	1	1
sp|Q9JIF7|COPB_MOUSE	1	1	1
tr|Q80X81|Q80X81_MOUSE	1	1	1
tr|Q91WT7|Q91WT7_MOUSE	1	1	1
sp|P17182|ENOA_MOUSE	1	1	1
sp|P47199|QOR_MOUSE	1	1	1
sp|Q61598|GDIB_MOUSE	1	1	1
sp|P52760|RIDA_MOUSE	1	1	1
sp|Q9DCQ2|ASPD_MOUSE	1	1	1
sp|P97364|SPS2_MOUSE	1	1	1
sp|Q9QYR9|ACOT2_MOUSE	1	1	1
sp|Q9DBF1|AL7A1_MOUSE	1	1	1
sp|Q3TNA1|XYLB_MOUSE	1	1	1
sp|Q9D6R2|IDH3A_MOUSE	1	1	1
sp|P26041|MOES_MOUSE;sp|P26043|RADI_MOUSE	1	1	1
sp|Q8CGK3|LONM_MOUSE	1	1	1
sp|Q99L47|F10A1_MOUSE	1	1	1
sp|P70195|PSB7_MOUSE	1	1	1
sp|O70251|EF1B_MOUSE	1	1	1
sp|P85094|ISC2A_MOUSE	1	1	1
sp|Q91Z53|GRHPR_MOUSE	1	1	1
sp|Q68FD5|CLH1_MOUSE	1	1	1
sp|Q80VH0|BANK1_MOUSE	1	1	1
sp|Q9Z2V4|PCKGC_MOUSE	1	1	1
sp|P68373|TBA1C_MOUSE;sp|P68369|TBA1A_MOUSE;sp|P05213|TBA1B_MOUSE;tr|A0A2R8VHF3|A0A2R8VHF3_MOUSE	1	1	1
sp|O08601|MTP_MOUSE	1	1	1
tr|Q792Z1|Q792Z1_MOUSE	1	1	1
sp|P07356|ANXA2_MOUSE	1	1	1
sp|Q5XJY5|COPD_MOUSE	1	1	1
sp|Q91VA0|ACSM1_MOUSE	1	1	1
sp|Q62095|DDX3Y_MOUSE;sp|P16381|DDX3L_MOUSE;sp|Q62167|DDX3X_MOUSE	1	1	1
sp|Q99KK2|NEUA_MOUSE	1	1	1
sp|Q9WTP6|KAD2_MOUSE	1	1	1
sp|Q9CZ30|OLA1_MOUSE	1	1	1
sp|Q9JMH6|TRXR1_MOUSE	1	1	1
sp|Q99LB7|SARDH_MOUSE	1	1	1
sp|Q9Z1Z0|USO1_MOUSE	1	1	1
sp|Q61171|PRDX2_MOUSE	1	1	1
sp|Q9JI75|NQO2_MOUSE	1	1	1
sp|Q9QXE0|HACL1_MOUSE	1	1	1
sp|Q8BWP5|TTPA_MOUSE	1	1	1
sp|Q922D8|C1TC_MOUSE	1	1	1
sp|P11499|HS90B_MOUSE	1	1	1
sp|O88587|COMT_MOUSE	1	1	1
sp|Q07076|ANXA7_MOUSE	1	1	1
sp|P54869|HMCS2_MOUSE	1	1	1
sp|Q61233|PLSL_MOUSE	1	1	1
sp|Q9DBE0|CSAD_MOUSE	1	1	1
sp|Q9CZL5|PHS2_MOUSE	1	1	1
sp|Q9CYR6|AGM1_MOUSE	1	1	1
sp|O35423|SPYA_MOUSE	1	1	1
sp|Q8BH95|ECHM_MOUSE	1	1	1
sp|P07901|HS90A_MOUSE	1	1	1
sp|P34914|HYES_MOUSE	1	1	1
sp|P29341|PABP1_MOUSE;tr|A2A5N3|A2A5N3_MOUSE	1	1	1
sp|Q9CXF0|KYNU_MOUSE	1	1	1
sp|Q91WK2|EIF3H_MOUSE	1	1	1
sp|Q64374|RGN_MOUSE	1	1	1
sp|P97328|KHK_MOUSE	1	1	1
sp|P47791|GSHR_MOUSE	1	1	1
sp|Q9DBP5|KCY_MOUSE	1	1	1
sp|Q8BGT5|ALAT2_MOUSE	1	1	1
sp|P63158|HMGB1_MOUSE	1	1	1
sp|Q9JLJ2|AL9A1_MOUSE	1	1	1
sp|Q91VS7|MGST1_MOUSE	1	1	1
sp|E9Q4Z2|ACACB_MOUSE	1	1	1
sp|P63101|1433Z_MOUSE	1	1	1
sp|P80317|TCPZ_MOUSE	1	1	1
sp|O55125|NIPS1_MOUSE	1	1	1
sp|P10126|EF1A1_MOUSE	1	1	1
sp|Q8VCT4|CES1D_MOUSE	1	1	1
sp|P45952|ACADM_MOUSE	1	1	1
sp|P70333|HNRH2_MOUSE;sp|O35737|HNRH1_MOUSE	1	1	1
sp|Q3UEG6|AGT2_MOUSE	1	1	1
sp|P51855|GSHB_MOUSE	1	1	1
sp|G3X982|AOXC_MOUSE	1	1	1
sp|Q8VCH0|THIKB_MOUSE	1	1	1
sp|Q91YP0|L2HDH_MOUSE	1	1	1
sp|P32020|NLTP_MOUSE	1	1	1
sp|P17563|SBP1_MOUSE	1	1	1
sp|P17751|TPIS_MOUSE	1	1	1
sp|P20108|PRDX3_MOUSE	1	1	1
sp|Q9CRB3|HIUH_MOUSE	1	1	1
sp|Q91YP3|DEOC_MOUSE	1	1	1
sp|Q9JM62|REEP6_MOUSE	1	1	1
sp|Q9DB29|IAH1_MOUSE	1	1	1
sp|P35700|PRDX1_MOUSE	1	1	1
sp|O70325|GPX4_MOUSE	1	1	1
sp|P22315|HEMH_MOUSE	1	1	1
sp|P08113|ENPL_MOUSE	1	1	1
sp|Q8VCW8|ACSF2_MOUSE	1	1	1
sp|P70266|F261_MOUSE	1	1	1
sp|Q61425|HCDH_MOUSE	1	1	1
sp|P21981|TGM2_MOUSE	1	1	1
sp|Q91X52|DCXR_MOUSE	1	1	1
sp|P06801|MAOX_MOUSE	1	1	1
sp|Q9EQH3|VPS35_MOUSE	1	1	1
sp|O70456|1433S_MOUSE	1	1	1
sp|P16460|ASSY_MOUSE	1	1	1
sp|Q8R0Y6|AL1L1_MOUSE	1	1	1
sp|O08807|PRDX4_MOUSE	1	1	1
sp|P55264|ADK_MOUSE	1	1	1
sp|P51174|ACADL_MOUSE	1	1	1
sp|P23492|PNPH_MOUSE	1	1	1
sp|Q9ET30|TM9S3_MOUSE	1	1	1
sp|P10518|HEM2_MOUSE	1	1	1
sp|Q60936|COQ8A_MOUSE	1	1	1
sp|P24270|CATA_MOUSE	1	1	1
sp|Q9JHI5|IVD_MOUSE	1	1	1
sp|Q7TMK9|HNRPQ_MOUSE	1	1	1
sp|Q8VCA8|SCRN2_MOUSE	1	1	1
sp|Q91X91|NADC_MOUSE	1	1	1
sp|Q99K67|AASS_MOUSE	1	1	1
sp|Q8R0F9|S14L4_MOUSE	1	1	1
sp|Q60854|SPB6_MOUSE	1	1	1
sp|Q91X83|METK1_MOUSE	1	1	1
sp|Q3UZZ6|ST1D1_MOUSE	1	1	1
sp|Q99KI0|ACON_MOUSE	1	1	1
tr|Q9R0T7|Q9R0T7_MOUSE;tr|Q9QUK9|Q9QUK9_MOUSE	1	1	1
sp|Q9DC50|OCTC_MOUSE	1	1	1
sp|Q8BG32|PSD11_MOUSE	1	1	1
sp|P05201|AATC_MOUSE	1	1	1
sp|P61982|1433G_MOUSE	1	1	1
sp|Q9CQE1|NPS3B_MOUSE	1	1	1
sp|Q9CWS0|DDAH1_MOUSE	1	1	1
sp|P56480|ATPB_MOUSE	1	1	1
sp|P05202|AATM_MOUSE	1	1	1
sp|Q8BMA6|SRP68_MOUSE	1	1	1
sp|Q78JT3|3HAO_MOUSE	1	1	1
sp|Q8QZT1|THIL_MOUSE	1	1	1
sp|P16331|PH4H_MOUSE	1	1	1
sp|P45376|ALDR_MOUSE	1	1	1
sp|P53657|KPYR_MOUSE	1	1	1
sp|Q9CZN7|GLYM_MOUSE	1	1	1
sp|Q9CQ62|DECR_MOUSE	1	1	1
sp|Q9D6Y7|MSRA_MOUSE	1	1	1
sp|P58252|EF2_MOUSE	1	1	1
sp|Q05816|FABP5_MOUSE	1	1	1
sp|P35505|FAAA_MOUSE	1	1	1
sp|O08749|DLDH_MOUSE	1	1	1
sp|P50544|ACADV_MOUSE	1	1	1
tr|Q14AA6|Q14AA6_MOUSE;sp|P62827|RAN_MOUSE	1	1	1
sp|O35490|BHMT1_MOUSE	1	1	1
sp|Q9CZS1|AL1B1_MOUSE	1	1	1
sp|Q9QY30|ABCBB_MOUSE	1	1	1
sp|Q99MZ7|PECR_MOUSE	1	1	1
sp|Q571F8|GLSL_MOUSE	1	1	1
sp|A2ADY9|DDI2_MOUSE	1	1	1
sp|P60710|ACTB_MOUSE	1	1	1
sp|P09411|PGK1_MOUSE	1	1	1
sp|Q9QYG0|NDRG2_MOUSE	1	1	1
sp|O09173|HGD_MOUSE	1	1	1
sp|P84084|ARF5_MOUSE	1	1	1
sp|P57780|ACTN4_MOUSE	1	1	1
sp|Q9DCD0|6PGD_MOUSE	1	1	1
sp|P47754|CAZA2_MOUSE	1	1	1
sp|Q91V92|ACLY_MOUSE	1	1	1
sp|Q8K157|GALM_MOUSE	1	1	1
sp|P25688|URIC_MOUSE	1	1	1
sp|P38647|GRP75_MOUSE	1	1	1
sp|Q8BWU8|AT2L1_MOUSE	1	1	1
sp|P07759|SPA3K_MOUSE	1	1	1
sp|P68372|TBB4B_MOUSE	1	1	1
sp|P08249|MDHM_MOUSE	1	1	1
sp|P99026|PSB4_MOUSE	1	1	1
sp|P50516|VATA_MOUSE	1	1	1
sp|P54071|IDHP_MOUSE	1	1	1
sp|P68510|1433F_MOUSE	1	1	1
sp|O09172|GSH0_MOUSE	NA	NA	NA
sp|P62141|PP1B_MOUSE	NA	NA	NA
sp|P16332|MUTA_MOUSE	NA	NA	NA
sp|Q8K010|OPLA_MOUSE	NA	NA	NA
sp|Q9DBJ1|PGAM1_MOUSE	NA	NA	NA
sp|Q9QXS1|PLEC_MOUSE	NA	NA	NA
sp|Q91X34|BAAT_MOUSE	NA	NA	NA
sp|Q99KC8|VMA5A_MOUSE	NA	NA	NA
sp|C0LLJ0|IMA8_MOUSE	NA	NA	NA
sp|P56399|UBP5_MOUSE	NA	NA	NA
sp|P35278|RAB5C_MOUSE	NA	NA	NA
sp|Q8CHR6|DPYD_MOUSE	NA	NA	NA
tr|Q8BVD2|Q8BVD2_MOUSE;sp|P24456|CP2DA_MOUSE;tr|L7N463|L7N463_MOUSE	NA	NA	NA
sp|Q99L13|3HIDH_MOUSE	NA	NA	NA
sp|P26516|PSMD7_MOUSE	NA	NA	NA
sp|P0DP28|CALM3_MOUSE;sp|P0DP27|CALM2_MOUSE;sp|P0DP26|CALM1_MOUSE	NA	NA	NA
sp|P62196|PRS8_MOUSE	NA	NA	NA
sp|O88685|PRS6A_MOUSE	NA	NA	NA
sp|Q60737|CSK21_MOUSE	NA	NA	NA
sp|Q9D3R6|KATL2_MOUSE;sp|Q3UMC0|AFG2H_MOUSE	NA	NA	NA
sp|Q9D0S9|HINT2_MOUSE	NA	NA	NA
sp|Q9WUM4|COR1C_MOUSE	NA	NA	NA
sp|P16546|SPTN1_MOUSE	NA	NA	NA
sp|Q9DCU9|HOGA1_MOUSE	NA	NA	NA
sp|Q61792|LASP1_MOUSE	NA	NA	NA
sp|Q9DBC0|SELO_MOUSE	NA	NA	NA
sp|P08226|APOE_MOUSE	NA	NA	NA
sp|Q8VDD5|MYH9_MOUSE	NA	NA	NA
sp|P48774|GSTM5_MOUSE	NA	NA	NA
sp|Q9JLM4|ZMYM3_MOUSE	NA	NA	NA
sp|P34884|MIF_MOUSE	NA	NA	NA
sp|P46412|GPX3_MOUSE	NA	NA	NA
sp|Q3ULD5|MCCB_MOUSE	NA	NA	NA
sp|Q7TQI3|OTUB1_MOUSE	NA	NA	NA
sp|Q8R164|BPHL_MOUSE	NA	NA	NA
sp|Q8BTM8|FLNA_MOUSE	NA	NA	NA
sp|P41216|ACSL1_MOUSE	NA	NA	NA
sp|O89079|COPE_MOUSE	NA	NA	NA
sp|P10711|TCEA1_MOUSE	NA	NA	NA
sp|Q9D2G2|ODO2_MOUSE	NA	NA	NA
sp|P61089|UBE2N_MOUSE	NA	NA	NA
sp|P09813|APOA2_MOUSE	NA	NA	NA
sp|Q8CGC7|SYEP_MOUSE	NA	NA	NA
sp|Q5SW19|CLU_MOUSE	NA	NA	NA
sp|Q8BMJ2|SYLC_MOUSE	NA	NA	NA
tr|Q9CPN9|Q9CPN9_MOUSE	NA	NA	NA
